# 1 How the FLP do nematodes jump?

2

3 Robert Morris, Leonie Wilson, Neil D. Warnock, Daniel Carrizo, Deborah Cox,

4 Matthew Sturrock, Kilian McGrath, Aaron G. Maule and Johnathan J. Dalzell\*

5

6 School of Biological Sciences, Institute for Global Food Security, Queen's University

7 Belfast

8

9 \*Corresponding author: [j.dalzell@qub.ac.uk](mailto:j.dalzell@qub.ac.uk)

10

11 Keywords: Neuropeptide; Entomopathogenic nematode; RNAi; Nictation; Dispersal;

12 Jumping; SPME GC-MS

13

## 14 Abstract

15 Entomopathogenic nematodes (EPNs) are a guild of obligate insect parasites which share

16 many physiological and behavioural traits with mammalian strongylid and strongyloidid

17 parasites; including host-finding nictation behaviour. EPNs are also interesting from the

18 perspective of insect biocontrol. Like other parasitic nematodes, EPNs employ a

19 sophisticated chemosensory apparatus to detect potential hosts and communicate with

20 conspecifics. Understanding the underlying molecular basis of relevant host-finding

21 behaviours could facilitate improved EPN biocontrol approaches, and could lend insight to

22 similar behaviours in economically important animal parasites. FMRFamide-like peptides are

23 enriched and conserved across the Phylum Nematoda, and have been linked with motor and

24 sensory function, including dispersal and aggregating behaviours in the free living nematode

25 *Caenorhabditis elegans*. RNA interference (RNAi) was used to knockdown the expression

26 of the FMRFamide-like protein 21 (GLGPRPLRFamide) gene (*flp-21*) in *Steinernema*  
27 *carpocapsae* infective juveniles (IJs). Our data show that *S. carpocapsae* is sensitive to  
28 neuronal RNAi, and that knockdown of *flp-21* has a significant impact on dispersal, nictation  
29 and jumping behaviours. Immunocytochemical localisation of FLP-21 to paired anterior  
30 neurons corroborates the RNAi data, further suggesting a role in sensory modulation. This  
31 study represents the first demonstration of a functional RNAi pathway in *S. carpocapsae*,  
32 through which we have linked a single gene product to the coordination of nematode  
33 jumping, nictation, and dispersal behaviours in IJs. These data can underpin efforts to study  
34 these behaviours in other economically important parasites, and could facilitate molecular  
35 approaches to EPN strain improvement for biocontrol.

36

## 37 **Introduction**

38 Entomopathogenic nematodes (EPNs) borrow their name from the entomopathogenic  
39 bacteria (*Photorhabdus*, *Serratia* and *Xenorhabdus* spp.) with which they form a commensal  
40 relationship. These nematodes provide a stable environment for the bacteria, and act as a  
41 vector between insect hosts. Once the nematode has invaded an insect, the nematode  
42 exsheaths (or 'recovers') and entomopathogenic bacteria are regurgitated into the insect  
43 haemolymph; the bacteria then rapidly kill and metabolise the insect, providing nutrition and  
44 developmental cues for the nematode. These entomopathogenic bacteria are then  
45 transmitted between nematode generations (Dillman et al., 2012). The entomopathogenic  
46 lifestyle has been found to arise independently in nematodes, at least three times, spanning  
47 significant phylogenetic diversity. *Heterorhabditis* and *Oscheius* spp. (Torrini et al., 2015)  
48 reside within clade 9 along with major strongylid parasites of man and animal (Holterman et  
49 al., 2006); *Steinernema* spp. reside within clade 10 alongside strongyloidid parasites (Viney  
50 and Lok, 2007).

51

52 Nictation is a dispersal and host-finding strategy, enacted by nematodes which stand upright  
53 on their tails, waving their anterior in the air (Lee et al., 2012). This behaviour is shared  
54 amongst many economically important animal parasitic and entomopathogenic nematodes,  
55 alongside the model nematode *C. elegans*, for which nictation is a phoretic dispersal  
56 behaviour of dauer larvae, used to increase the likelihood of attachment to passing animals.  
57 Nictation is regulated by amphidial IL2 neurons in *C. elegans*, which occur in lateral triplets  
58 either side of the pharyngeal metacarpus (Lee et al., 2012; Schroeder et al., 2013). IL2  
59 neurons display significant remodelling from *C. elegans* L3 to dauer (the only life-stage to  
60 enact nictation behaviours) such that connectivity with other chemosensory and cephalic  
61 neurons is enhanced (Schroeder et al., 2013). It has been shown that IL2 neurons express  
62 the DES-2 acetylcholine receptor subunit, and that cholinergic signalling is requisite for  
63 nictation (Pereira et al., 2015; Zhang et al., 2014; Lee et al., 2012; Yassin et al., 2001).  
64 Additionally, the central pair of IL2 neurons express the FMRFamide-like peptide (FLP)  
65 receptor, NPR-1 (Coates and de Bono, 2002). To date there are two known NPR-1 agonists;  
66 FLP-18 and FLP-21 (Rogers et al., 2003). However, there is also known redundancy of  
67 FLP-18 and FLP-21 in signalling through other neuropeptide receptors (NPR-4, -5, -6 -10, -  
68 11, and NPR-2, -3, -5, -6, 11, respectively) in heterologous systems (Ezcurra et al., 2016;  
69 and reviewed by Li and Kim, 2014), making functional linkage difficult.

70

71 *Steinernema* spp. also display a highly specialised jumping behaviour which is thought to  
72 enhance both dispersal and host attachment. Jumping occurs when a nictating infective  
73 juvenile (IJ) unilaterally contracts body wall muscles bringing the anterior region towards the  
74 posterior region, forming a loop. This generates high pressure within the IJ pseudocoel, and  
75 differential stretching and compression forces across the nematode cuticle. Release of this  
76 unilateral contraction, in conjunction with the correction of cuticle pressure, triggers enough  
77 momentum for an IJ to jump a distance of nine times body length, to a height of seven times  
78 body length (Campbell and Kaya, 1999).

79

80 The recent publication of five *Steinernema* spp. genomes, along with stage-specific  
81 transcriptomes (Dillman et al., 2015) represents a valuable resource, alongside the  
82 previously published genome of *Heterorhabditis bacteriophora* (Bai et al., 2013). The  
83 genome of *Steinernema carpocapsae* is the most complete, at an estimated 85.6 Mb, with  
84 predicted coverage of 98% (Dillman et al., 2015). *S. carpocapsae* was selected as a test  
85 subject for our study due to the quality of genome sequence, and the interesting biology  
86 underpinning dispersal and host-finding behaviours in this species. The close phylogenetic  
87 relationship between *Steinernema* spp. coupled with a diverse behavioural repertoire,  
88 particularly in terms of dispersal and host-finding (Castelletto et al., 2014; Lee et al., 2016),  
89 make this genus an extremely attractive model for comparative neurobiology. The aim of  
90 this study was to examine RNAi functionality in *S. carpocapsae*, and to probe the  
91 involvement of FLP-21 in coordinating nictation, jumping and dispersal phenotypes, as a  
92 prelim to probing the neuronal and molecular underpinnings of host-finding behaviour in this  
93 genus.

94

## 95 **Materials and Methods**

### 96 ***S. carpocapsae* culture**

97 *S. carpocapsae* (ALL) was maintained in *Galleria mellonella* at 23°C. IJs were collected by  
98 White trap (White, 1927) in a solution of Phosphate Buffered Saline (PBS). Freshly emerged  
99 IJs were used for each experiment.

100

### 101 **BLAST analysis of *S. carpocapsae* RNAi pathway**

102 BLAST analysis of RNAi pathway components was conducted as in Dalzell et al. (2011),  
103 using a modified list of core RNAi pathway components from *C. elegans*, against predicted  
104 protein sets and contigs of the *S. carpocapsae* genome, through the Wormbase Parasite  
105 BLAST server (Howe et al., 2016; Altschul et al., 1990).

106

107 **dsRNA synthesis**

108 *Sc-flp-21* (Gene ID: L596\_g19959.t1) dsRNA templates were generated from *S.*  
109 *carpocapsae* IJ cDNA using gene-specific primers with T7 recognition sites (see Table 1).  
110 Neomycin phosphotransferase (*neo*) and Green Fluorescent Protein (*gfp*) dsRNA templates  
111 were generated from pEGFP-N1 (GenBank: U55762.1). Template PCR products were  
112 generated as follows: [95 °C x 10 min, 40 x (95 °C x 30 s, 60 °C x 30 s, 72 °C x 30 s) 72 °C x  
113 10 min]. PCR products were assessed by gel electrophoresis, and cleaned using the  
114 Chargeswitch PCR clean-up kit (Life Technologies). dsRNA was synthesised using the T7  
115 RiboMAX™ Express Large Scale RNA Production System (Promega), and quantified by a  
116 Nanodrop 1000 spectrophotometer.

117

118 **RNAi**

119 1000 *S. carpocapsae* were incubated in 50 µl PBS with dsRNA and 50 mM serotonin across  
120 four experimental regimes; (i) 24 h in 5 mg/ml dsRNA / serotonin / PBS; (ii) 24 h in 5 mg/ml  
121 dsRNA / serotonin / PBS, followed by washes to remove the initial dsRNA, and 24 h  
122 recovery in PBS only; (iii) 48 h in 5 mg/ml dsRNA / serotonin / PBS; and (iv) 48 h in 1 mg/ml  
123 dsRNA and serotonin. Each experiment was conducted at 23 °C. We found that 50 mM  
124 serotonin induced oral uptake of fluorescent dyes under all conditions tested; 50 mM  
125 octopamine did not (data not shown).

126

127 **RNA extraction, cDNA synthesis and quantitative (q)RT-PCR**

128 Total RNA was extracted from 1000 IJs using the Simply RNA extraction kit (Promega, UK)  
129 and Maxwell 16 extraction system (Promega, UK). cDNA was synthesised using the High  
130 Capacity RNA to cDNA kit (Applied Biosystems, UK). Each individual qRT-PCR reaction  
131 comprised 5 µl Faststart SYBR Green mastermix (Roche Applied Science), 1 µl each of the  
132 forward and reverse primers (10 µM), 1 µl water, 2 µl cDNA. PCR reactions were conducted  
133 in triplicate for each individual cDNA using a Rotorgene Q thermal cycler under the following  
134 conditions: [95 °C x 10 min, 40 x (95 °C x 20 s, 60 °C x 20 s, 72 °C x 20 s) 72 °C x 10 min].

135 Primer sets were optimised for working concentration, annealing temperature and analysed  
136 by dissociation curve for contamination or non-specific amplification by primer–dimer as  
137 standard. The PCR efficiency of each specific amplicon was calculated using the Rotorgene  
138 Q software. Relative quantification of target transcript relative to two endogenous control  
139 genes (*Sc-act* and *Sc-β-tubulin*) was calculated by the augmented  $\Delta\Delta\text{Ct}$  method (Pfaffl,  
140 2001), relative to the geometric mean of endogenous references (Vandesompele et al.,  
141 2002). One way ANOVA and Fisher's LSD test were used to analyse data (GraphPad Prism  
142 6). The most similar non-target gene (*L596\_g5821.t1*) was identified using BLASTn against  
143 the *S. carpocapsae* genomic contigs (supplemental figure S1), and primers *Sc-*  
144 *L596\_g5821.t1-f* and *Sc- L596\_g5821.t1-r* were used to assess transcript abundance  
145 relative to *Sc-act* across control and experimental conditions for the 48h dsRNA exposure  
146 experiments only (Table 1).

147

148

149

150

151

152

153

154

155

156

157

158

159

160

161

162

163 **Table 1.** dsRNA synthesis and qRT-PCR primer sequences.

| <b>Primer designation</b> | <b>Sequence (5' – 3')</b>                |
|---------------------------|------------------------------------------|
| Sc-flp-21-F               | TTCTGAGCCGCTATCTGAGC                     |
| Sc-flp-21-Ft7             | TAATACGACTCACTATAGGTTCTGAGCCGCTATCTGAGC  |
| Sc-flp-21-R               | AGTCGCAGGGAACAAACAAT                     |
| Sc-flp-21-Rt7             | TAATACGACTCACTATAGGAGTCGCAGGGAACAAACAAT  |
| neo-F                     | GGTGGAGAGGCTATTCGGCTA                    |
| neo-Ft7                   | TAATACGACTCACTATAGGGGTGGAGAGGCTATTCGGCTA |
| neo-R                     | CCTTCCCGCTTCAGTGACAA                     |
| neo-Rt7                   | TAATACGACTCACTATAGGCCTTCCCGCTTCAGTGACAA  |
| gfp-F                     | GGCATCGACTTCAAGGAGGA                     |
| gfp-Ft7                   | TAATACGACTCACTATAGGGGCATCGACTTCAAGGAGGA  |
| gfp-R                     | GTAGTGGTTGTCGGGCAGCA                     |
| gfp-Rt7                   | TAATACGACTCACTATAGGGTAGTGGTTGTCGGGCAGCA  |
| Sc-act-Fq                 | ATGTTCCAGCCCTCTTTCT                      |
| Sc-act-Rq                 | GATGTCGCACTTCATGATCG                     |
| Sc- $\beta$ tub-Fq        | CTCGGAGGAGGAGATGACAG                     |
| Sc- $\beta$ tub-Rq        | ATCATAACGGCACGAGGAAC                     |
| Sc-flp-21-Fq              | GCTGCCTTCTCGTACTCTTC                     |
| Sc-flp-21-Rq              | TCAGATAGCGGCTCAGAAGC                     |
| Sc-L596_g5821.t1-Fq       | GTGGGAAATCCGACACAAA                      |
| Sc-L596_g5821.t1-Rq       | GTCACGTCGTCCACTATAAAC                    |

164

165

166

167

168

## 169 **Headspace Solid-Phase MicroExtraction (SPME) GC-MS**

170 Approximately 5 g of fresh waxworm (*Galleria mellonella*) and mealworm (*Tenebrio molitor*)  
171 larvae were placed into 20 mL glass tubes and sealed. The holder needle was exposed to  
172 the headspace of the tube over a 120 min timecourse (extraction time) at room temperature  
173 (22 °C). After this time, the SPME syringe was directly desorbed in the GC injection port for  
174 5 min. A fused silica fibre coated with a 95 µm layer of carboxen–polydimethylsiloxane  
175 (CAR–PDMS; Supelco) was used to extract the volatile compounds from the samples.  
176 Fibres were immediately thermally desorbed in the GC injector for 5 min (with this time we  
177 desorb the analytes and re-activated the fiber for the next analysis) at 250 °C and the  
178 compounds were analysed by GC-MS.

179  
180 A CTC Analytics CombiPal autosampler was coupled to a 7890N Agilent gas chromatograph  
181 (Agilent, Palo Alto, California) and connected to a 5975C MSD mass spectrometer. The  
182 manual SPME holder (Supelco, Bellefonte, PA, USA) was used to perform the experiments.  
183 Chromatographic separation was carried out on 30 m x 0.25 mm I.D. ZB-semivolatiles,  
184 Zebron column (Phenomenex, Macclesfield, UK). The oven temperature was set at 40 °C  
185 for 3 min, temperature increased from 40 to 250 °C at 5 °C min<sup>-1</sup> and set at the maximum  
186 temperature for 4 min. Helium was used as carrier gas at 1 ml min<sup>-1</sup>. Mass spectra were  
187 recorded in electron impact (EI) mode at 70 eV. Scan mode was used for the acquisition to  
188 get all the volatile compounds sampled. Quadrupole and source temperature were set at 150  
189 and 230 °C respectively. Compounds were identified using MS data from the NIST library  
190 (>95% confidence).

191

## 192 **Dispersal assays**

193 100 *S. carpocapsae* IJs were placed in the centre of a 90 mm PBS agar plate (1.5 % w/v) in  
194 a 5 µl aliquot of PBS. Plates were divided into four zones; a central zone 15 mm in  
195 diameter, and three further zones equally spaced over the remainder of the plate. Plates  
196 were allowed to air dry for ~5 min. Evaporation of the PBS allowed the IJs to begin



197 movement over the agar surface. Lids were then placed back onto the Petri dishes, and  
198 plates were incubated at 23 °C in darkness for one hour. IJs were counted across central  
199 and peripheral zones and expressed as percentage of total worms. Our subsequent  
200 analysis was conducted on total IJs found within the two central zones. Relative to those  
201 found in the two peripheral zones.

202

### 203 **Nictation & jumping assays**

204 3.5 g of compost (John Innes No.2) was placed in a petri dish (55 mm), and dampened  
205 evenly with 150 µl PBS. Approximately ten IJs were pipetted onto the compost in 5 µl of  
206 PBS, and left for 5 minutes at room temperature; this enabled IJs to begin nictating. For the  
207 waxworm volatile challenge, one healthy waxworm (UK Waxworms Ltd.) was placed inside a  
208 1 mL pipette tip, without filter. For the mealworm volatile challenge, two mealworms  
209 (Monkfield Nutrition, UK), weight-matched to the waxworm, were placed inside a 1 mL  
210 pipette tip, without filter. Blank exposure data were captured using an empty 1 ml pipette tip,  
211 without filter. In each case, the pipette was set to eject a volume of 500 µL, comprising air  
212 and the corresponding insect volatiles. A binocular microscope was used to record IJ  
213 behavioural responses following up to five volatile exposures each, on gentle ejection from  
214 the pipette within a distance of ~1 cm of the *S. carpocapsae* IJs. A five second period was  
215 allowed between each volatile exposure. Recording ended for any individual when jumping  
216 was observed or the IJ abandoned a nictating stance (this always corresponded with  
217 migration away from the stimulus). A jumping index was calculated for each treatment group  
218 (Dillman et al., 2012). Additional behavioural observations were recorded, and subsequently  
219 reported as percentage IJs displaying the behaviour over the course of up to five volatile  
220 exposures, or until the IJ migrated / jumped out of the field of vision.

221

### 222 **Immunocytochemistry**

223 Freshly emerged *S. carpocapsae* IJs were fixed in 4 % paraformaldehyde overnight at 4 °C,  
224 followed by a brief wash in antibody diluent (AbD; 0.1 % bovine serum albumin, 0.1 %

225 sodium azide, 0.1 % Triton-X-100 and PBS pH 7.4). The fixed specimens were roughly  
226 chopped on a glass microscope slide with a flat edged razor, and incubated in primary  
227 polyclonal antiserum raised against GLGPRPLRFamide, N-terminally coupled to KLH, and  
228 affinity purified (1:800 dilution in AbD) for 72 h at 4 °C. Subsequently, chopped IJs were  
229 washed in AbD for 24 h at 4 °C, and then incubated in secondary antibody conjugated to  
230 fluorescein isothiocyanate (1:100 dilution in AbD) for 72 h at 4 °C. A further AbD wash for  
231 24 h at 4 °C was followed by incubation in Phalloidin–Tetramethylrhodamine B  
232 isothiocyanate (1:100 dilution in AbD) for 24 h at 4 °C. Finally, chopped IJs were washed in  
233 AbD for 24 h at 4 °C. Specimens were mounted onto a glass slide with Vectasheild  
234 mounting medium and viewed with a Leica TCS SP5 confocal scanning laser microscope.  
235 Controls included the omission of primary antiserum, and pre-adsorption of the primary  
236 antiserum with  $\geq 250$  ng of GLGPRPLRFamide. Pre-adsorption in GLGPRPLRFamide did not  
237 alter staining patterns.

238

### 239 **Statistical analysis**

240 Data pertaining to both qRT-PCR and behavioural assays were assessed by Brown-  
241 Forsythe and Bartlett's tests to examine homogeneity of variance between groups. Were  
242 variance differed statistically between groups a Kruskal-Wallis test was followed by Dunn's  
243 multiple comparison test. In all other instances, One-way or two-way ANOVA was followed  
244 by Fisher's Least Significant Difference (LSD) test. All statistical tests were performed using  
245 GraphPad Prism 6.

246

## 247 **Results**

### 248 **The RNAi pathway of *S. carpocapsae***

249 As is the case for other parasitic nematode species, *S. carpocapsae* was found to encode a  
250 less diverse RNAi pathway than that of *C. elegans*, in terms of gene for gene conservation

251 (Dalzell et al., 2011). However, the apparent reduction in AGO homologue diversity is offset  
252 by significant expansions across several putative *ago* genes, to give a predicted overall  
253 increase in the *S. carpocapsae* AGO complement (38 in total), relative to *C. elegans* (24, not  
254 including pseudogenes) (Vasquez-Rifo et al., 2012); WAGO-1 (19), ALG-1 (three), ALG-3  
255 (two), WAGO-5 (four), WAGO-10 (two), WAGO-11 (three) are all expanded relative to *C.*  
256 *elegans*. Notably, no identifiable homologue of RDE-1, the primary AGO for exogenously  
257 triggered RNAi events in *C. elegans*, could be identified (Supplementary table S2).

258

259 The presence of PRG-1 and components of the piwi interacting (pi)RNA biosynthetic  
260 machinery suggests that a functional piRNA (or 21U RNA) pathway may be present. Whilst  
261 ERGO-1 is not conserved, two putative ALG-3 orthologues suggest that a functional endo-  
262 siRNA (26G RNA) pathway may also exist, which is supported by broad conservation of  
263 associated proteins. MicroRNA-associated AGOs, ALG-1 and ALG-2 are conserved, with a  
264 small apparent expansion of ALG-1 to three related proteins in *S. carpocapsae*. Further  
265 understanding of how RNAi pathway complements influence functionality will require small  
266 RNA sequencing efforts, and functional genomics approaches.

267

268 The RNA-dependent RNA Polymerase (RdRp), RRF-3 is conserved, and known to function  
269 antagonistically to exogenously primed RNAi, through competing activity for pathway  
270 components required for both exogenous RNAi, and the endo-siRNA (26G RNA) pathway  
271 within which RRF-3 operates (Simmer et al., 2002; Sijen et al., 2001; reviewed by Billi et al.,  
272 2014). The RdRps, RRF-1 and EGO-1, which are involved in the biosynthesis of secondary  
273 siRNAs (22G RNAs) are also conserved. Loss of the argonaute ERGO-1 which functions  
274 upstream of secondary siRNA biogenesis in the endo-siRNA (26G RNA) pathway in *C.*  
275 *elegans*, also leads to an exogenous ERI phenotype (Enhanced RNAi), but is not conserved  
276 in *S. carpocapsae*, suggesting that ALG-3 / -4 may be solely responsible for endo-siRNA  
277 functionality (Conine et al., 2010; Han et al., 2009).

278

279 The apparent absence of the intestinal dsRNA transporter, SID-2 is consistent with findings  
 280 from other parasitic nematodes (Dalzell et al., 2011; Geldhof et al., 2007; Knox et al., 2005).  
 281 SID-1 also appears to be absent, however CHUP-1, a putative cholesterol uptake protein  
 282 which contains a SID-1 RNA channel is present, and may assist in the intercellular spread of  
 283 dsRNA. RSD-3, which also effects intercellular spread of dsRNA is conserved (see Figure 1  
 284 for pathway overview).  
 285

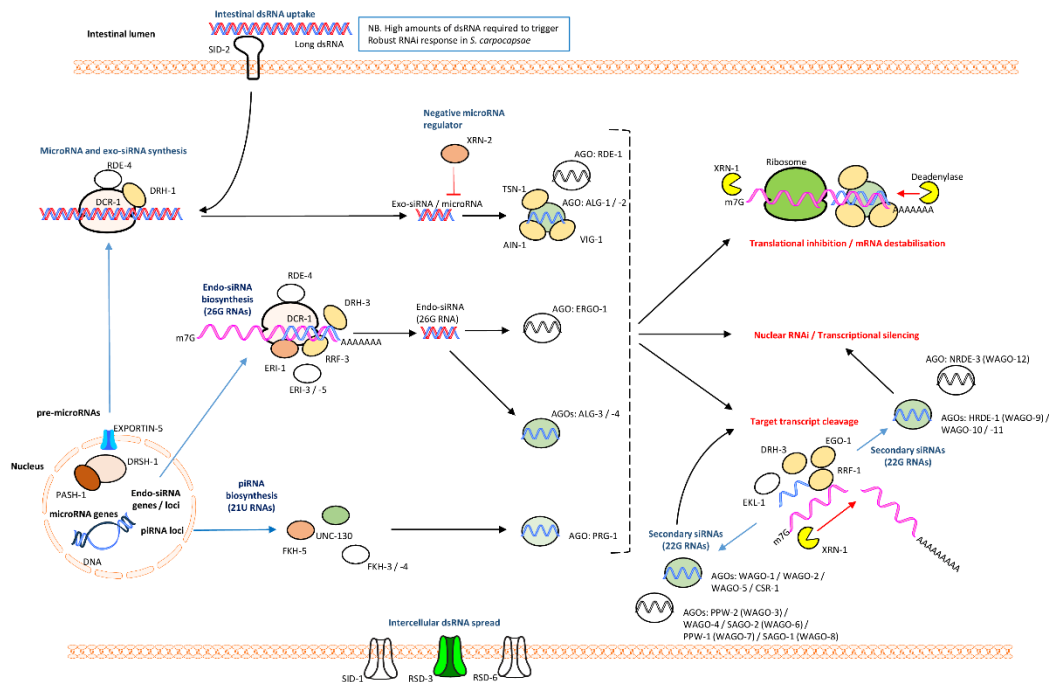

286

287 **Figure 1. Core RNAi pathway components of *S. carpocapsae* relative to *C. elegans*.**

288 Proteins with at least one putative homologue are represented in colour; those without any  
 289 identifiable homologues are colourless. See supplemental tables for information on number  
 290 of putative related homologues.

291

292 **Knockdown of *Sc-flp-21***

293 Various treatment regimens were employed in order to assess the responsiveness of *S.*  
 294 *carpocapsae* IJs to exogenous dsRNA. 24h incubation in 5 mg/ml dsRNA, with 50 mM  
 295 serotonin was not sufficient to trigger statistically significant *Sc-flp-21* knockdown (Fig. 2A),  
 296 however a 24h dsRNA / serotonin incubation followed by a 24h recovery in PBS only, did  
 297 trigger a small decrease in *Sc-flp-21* relative to *Sc-act* when compared to *gfp* and *neo*

298 dsRNA controls ( $0.70 \pm 0.11$ ,  $P < 0.05$ ) (Fig. 2B). Extended incubation of *S. carpocapsae* IJs  
299 in 5 mg/ml dsRNA and 50 mM serotonin for 48 h triggered robust knockdown of *Sc-flp-21*  
300 ( $0.16 \pm 0.07$ ,  $P < 0.0001$ ) (Fig. 2C). 48 h incubation in 1 mg/ml dsRNA, with 50 mM serotonin  
301 also triggered significant levels of *Sc-flp-21* knockdown ( $0.49 \pm 0.27$ ,  $P < 0.01$ ), however this  
302 was not as effective as the 5 mg/ml dsRNA treatment (Fig. 2D). A BLAST analysis identified  
303 predicted *S. carpocapsae* transcript *L596\_g5821.t* as the non-target gene with most  
304 similarity to the *Sc-flp-21* dsRNA (supplemental figure S1). The relative expression level of  
305 *L596\_g5821.t1* was unaffected by a 48 h incubation in 5 mg/ml *Sc-flp-21* dsRNA with 50 mM  
306 serotonin, relative to *neo* and *gfp* dsRNA ( $1.013 \pm 0.04$ ,  $P > 0.05$ ) (Fig. 2E).

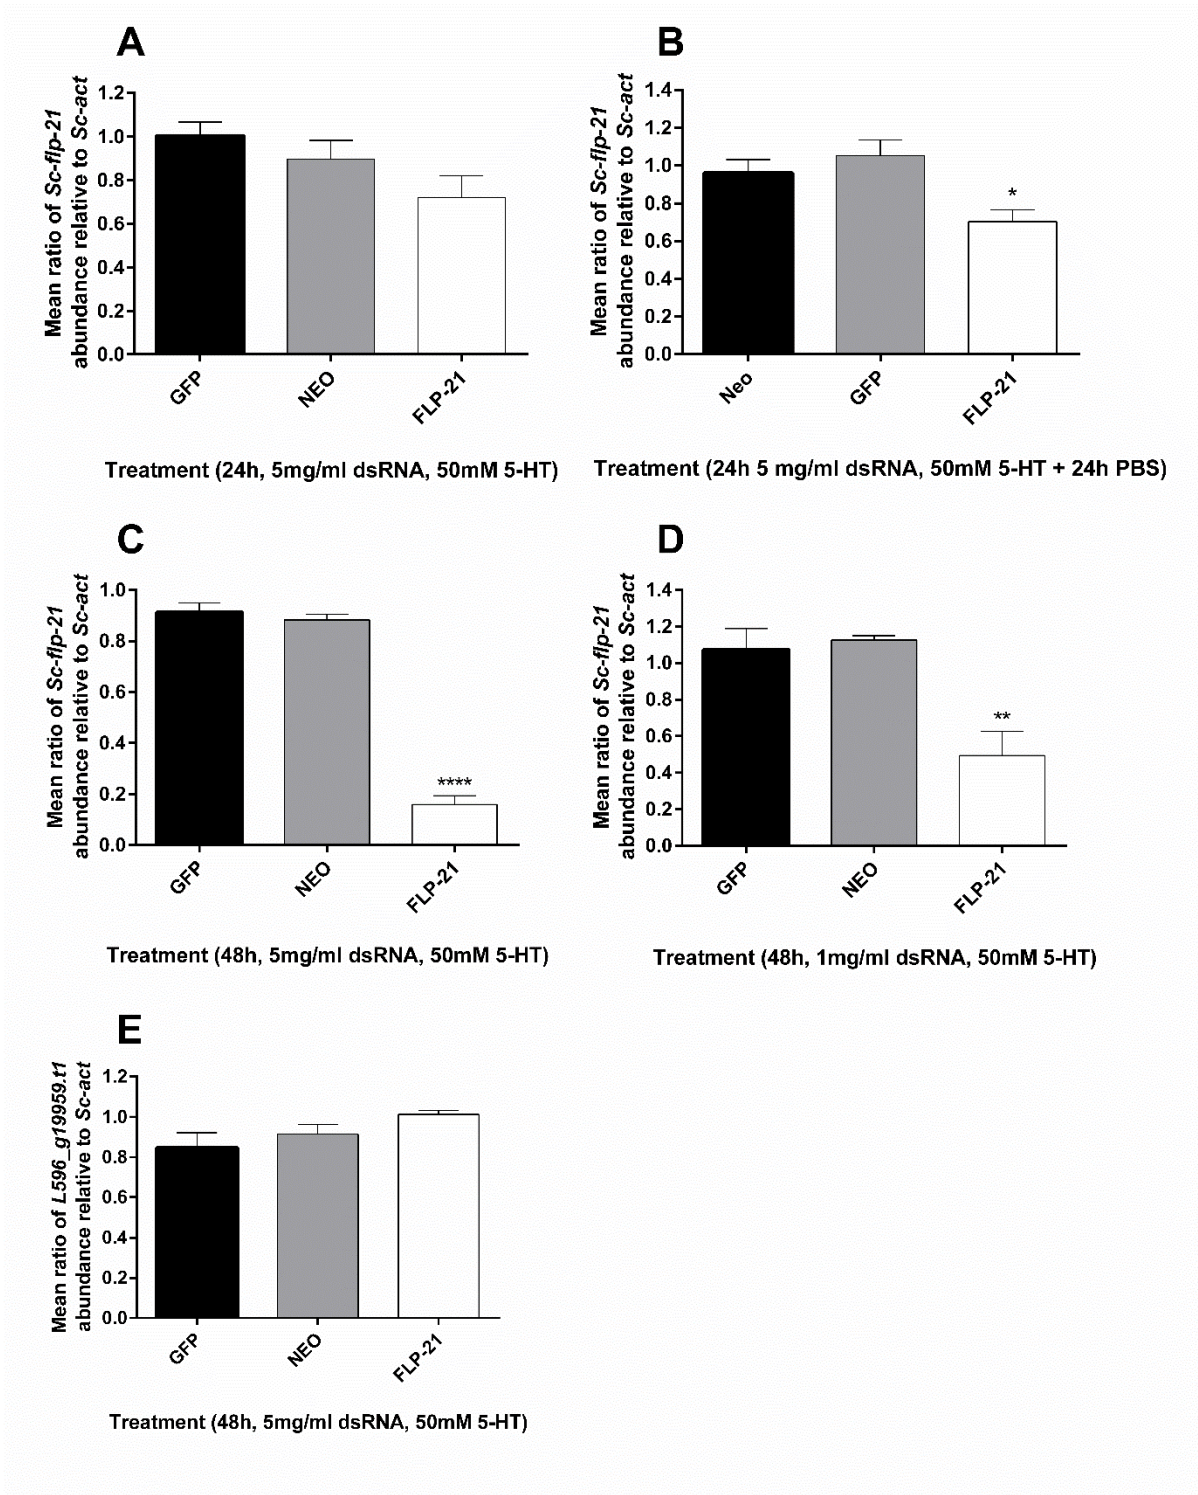

307

308 **Figure 2. qRT-PCR expression analysis of *Sc-flp-21* and off-target control gene (A) *Sc-***  
309 ***flp-21* transcript ratio relative to *Sc-act* following 24 h incubation in 5 mg/ml dsRNA, 50 mM**  
310 **serotonin. (B) *Sc-flp-21* transcript ratio relative to *Sc-act* following 24 h incubation in 5 mg/ml**  
311 **dsRNA, 50 mM serotonin, and 24 h in PBS; (C) *Sc-flp-21* transcript ratio relative to *Sc-act***

312 following 48 h incubation in 5 mg/ml dsRNA, 50 mM serotonin; (D) *Sc-flp-21* transcript ratio  
313 relative to *Sc-act* following 48 h incubation in a reduced 1 mg/ml dsRNA, 50 mM serotonin;  
314 (E) *L596\_g5821.t1* transcript ratio relative to *Sc-act* following 48 h incubation in 5 mg/ml  
315 dsRNA, 50 mM serotonin. \*P<0.05; \*\*P<0.01; \*\*\*\*P<0.0001.

316

### 317 **Host insect volatiles**

318 Comprehensive volatile signatures were characterised, and significant differences noted  
319 between *G. mellonella* and *T. molitor* larvae. In total, we identified 10 compounds unique to  
320 *G. mellonella*, four compounds unique to *T. molitor*, and 14 compounds shared between  
321 both species. These profiles vary significantly from headspace GC-MS data presented by  
322 Hallem et al. (2011) for the same insect species (see Table 1).

323

324

325

326

327

328

329

330

331

332

333

334

335

336

337

338

339 **Table 1. Headspace SPME GC-MS volatile profiles of *Galleria mellonella* and *Tenebrio***  
 340 ***molitor* larvae**

| <i>Galleria mellonella</i>   | <i>Tenebrio molitor</i>     | Shared                                   |
|------------------------------|-----------------------------|------------------------------------------|
| α-pinene                     | decanal                     | nonanal                                  |
| butanoic acid                | 1-tetradecanol-methyl ether | hexanoic acid                            |
| tetradecanal                 | 1-hexadecanol               | octanoic acid                            |
| tridecanol                   | cyclohexadecane             | cyclododecane                            |
| nonanoic acid                |                             | decanoic acid                            |
| 2-[phenyl methylene]-octanal |                             | dodecanoic acid                          |
| tetracosanol                 |                             | tetradecanoic acid                       |
| tridecane                    |                             | pentadecanoic acid                       |
| 1-heptacosanol               |                             | bis(2-ethylhexyl) ester-hexanedioic acid |
| cis-9-hexadecenoic acid      |                             | hexadecanoic acid                        |
|                              |                             | heptadecanoic acid                       |
|                              |                             | cis-10-heptadecenoic acid                |
|                              |                             | squalene                                 |
|                              |                             | octadecanoic acid                        |

341

342 **Behavioural impact of *Sc-flp-21* knockdown**

343 *S. carpocapsae* IJs were challenged by exposure to volatiles from *G. mellonella* or *T. molitor*  
 344 following RNAi (48h 5 mg/ml dsRNA, 50 mM serotonin) and control treatments. A decrease  
 345 in hyperactive nictation following *Sc-flp-21* knockdown was observed (10% ±5.774) relative  
 346 to untreated (40.75% ±6.75; P<0.01) and *neo* dsRNA treatment (47.5% ±2.5; P<0.001)  
 347 following *G. mellonella* volatile challenge (Fig. 3A). Likewise, a decrease in hyperactive  
 348 nictation was observed following *T. molitor* volatile challenge to *Sc-flp-21* RNAi IJs (5.0%  
 349 ±2.9), relative to untreated (57.25% ±2.8; P<0.0001) and *neo* dsRNA treatment (35.0% ±6.5;  
 350 P<0.001) (Fig. 3B). A decrease in the jumping index of IJs following *Sc.flp-21* dsRNA



351 treatment was observed when challenged by *G. mellonella* volatiles ( $0.08 \pm 0.03$ ) relative to  
352 untreated ( $0.69 \pm 0.11$ ;  $P < 0.001$ ) and *neo* dsRNA treated ( $0.50 \pm 0.04$ ;  $P < 0.01$ ) (Fig. 3E) .  
353 Similarly, a decrease in jumping index as a response to *T. molitor* volatiles was observed  
354 following *Sc-flp-21* RNAi ( $0.03 \pm 0.03$ ) relative to untreated ( $0.44 \pm 0.06$ ;  $P < 0.001$ ) and *neo*  
355 dsRNA treatment ( $0.38 \pm 0.05$ ;  $P < 0.001$ ) (Fig 3F). However, it appears that *Sc-flp-21*  
356 knockdown does result in a discrimination between *G. mellonella* and *T. molitor* volatiles in  
357 triggering standing phenotypes (as described by Campbell and Gaugler, 1993; Ishibashi and  
358 Kondo, 1990). No statistically significant difference in the percentage of IJs displaying a  
359 standing phenotype is observed in response to *G. mellonella* volatiles between experimental  
360 groups, however a significant decrease in standing phenotypes was observed in response to  
361 *Sc-flp-21* knockdown following exposure to *T. molitor* volatiles (0.00%) relative to *neo*  
362 dsRNA treated ( $40.0\% \pm 9.13$ ;  $P < 0.05$ ) but not untreated ( $29.5\% \pm 4.4$ ;  $P > 0.05$ ) using  
363 Kruskal-Wallis and Dunn's multiple comparison tests. Undoubtedly, the significant difference  
364 in variance across experimental groups in this instance has reduced statistical power (Fig.  
365 3D). It was also found that *Sc-flp-21* RNAi resulted in significantly decreased lateral  
366 dispersal, relative to both untreated and *neo* dsRNA treatment ( $P < 0.0001$ ) (Fig. 3G). In all  
367 instances, dsRNA treatment regimens which triggered lower levels of *Sc-flp-21* knockdown  
368 relative to the 48h 5 mg/ml dsRNA, 50 mM serotonin approach, failed to trigger null  
369 phenotypes (data not shown).

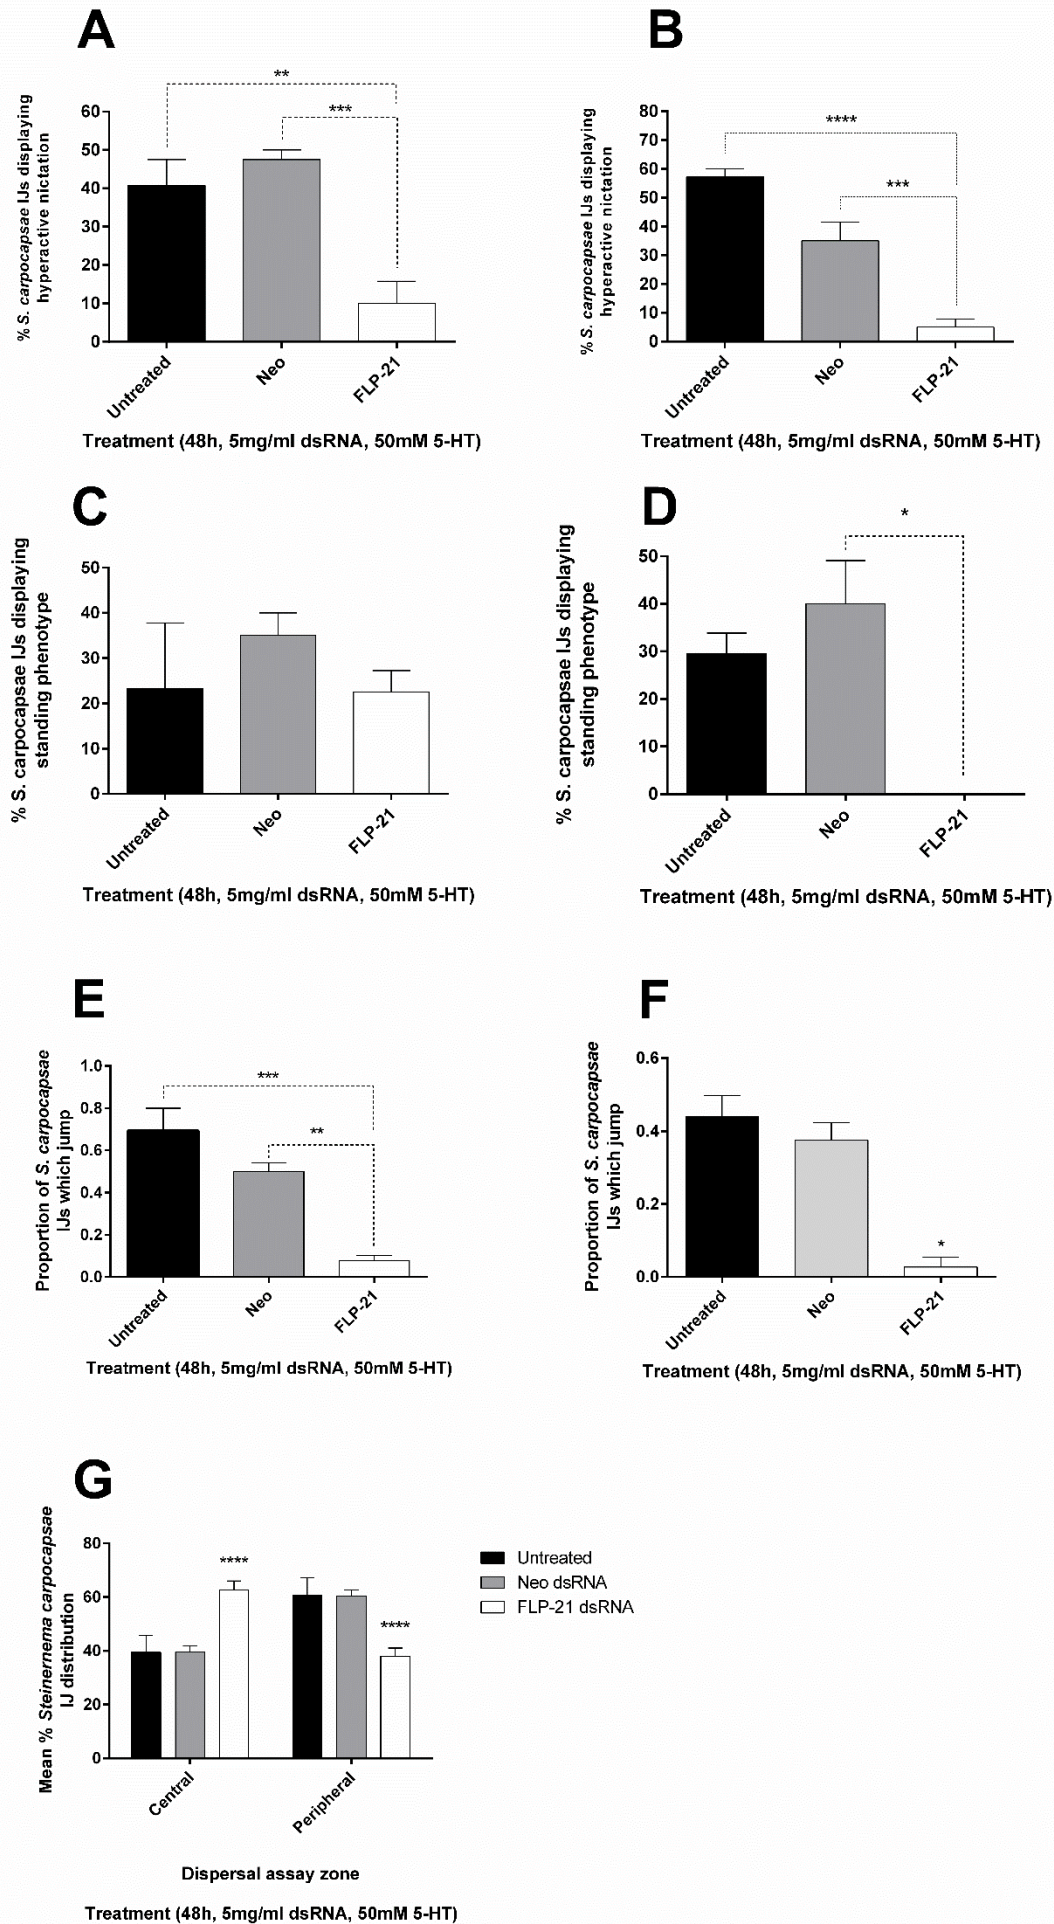

371 **Figure 3. *S. carpocapsae* IJ behavioural assays post-RNAi**

372 Behavioural impact of *Sc-flp-21* knockdown following IJ incubation in 5 mg/ml dsRNA, 50  
373 mM serotonin: (A) Mean percentage of *S. carpocapsae* displaying hyperactive nictation upon  
374 challenge by *G. mellonella* volatiles. (B) Mean percentage of *S. carpocapsae* displaying  
375 hyperactive nictation upon challenge by *T. molitor* volatiles. (C) Mean percentage of *S.*  
376 *carpocapsae* displaying standing upon challenge by *G. mellonella* volatiles. (D) Mean  
377 percentage of *S. carpocapsae* displaying standing upon challenge by *T. molitor* volatiles. (E)  
378 Mean jumping index of *S. carpocapsae* displaying upon challenge by *G. mellonella* volatiles.  
379 (F) Mean jumping index of *S. carpocapsae* upon challenge by *T. molitor* volatiles. (G) Mean  
380 percentage distribution of *S. carpocapsae* IJs across central and peripheral assay zones.

381 \*P<0.05; \*\*P<0.01; \*\*\*\*P<0.0001.

382

383 **Immunocytochemical localisation of FLP-21 in *S. carpocapsae* IJs**

384 FLP-21 was localised to paired neurons within the central nerve ring region of *S.*  
385 *carpocapsae* IJs. Without additional neuroanatomical information on *S. carpocapsae* IJs it is  
386 impossible to define these cells, however they do appear to project posteriorly, terminating in  
387 synapses around the region of the pharyngeal metacarpal bulb (Fig. 4).

388

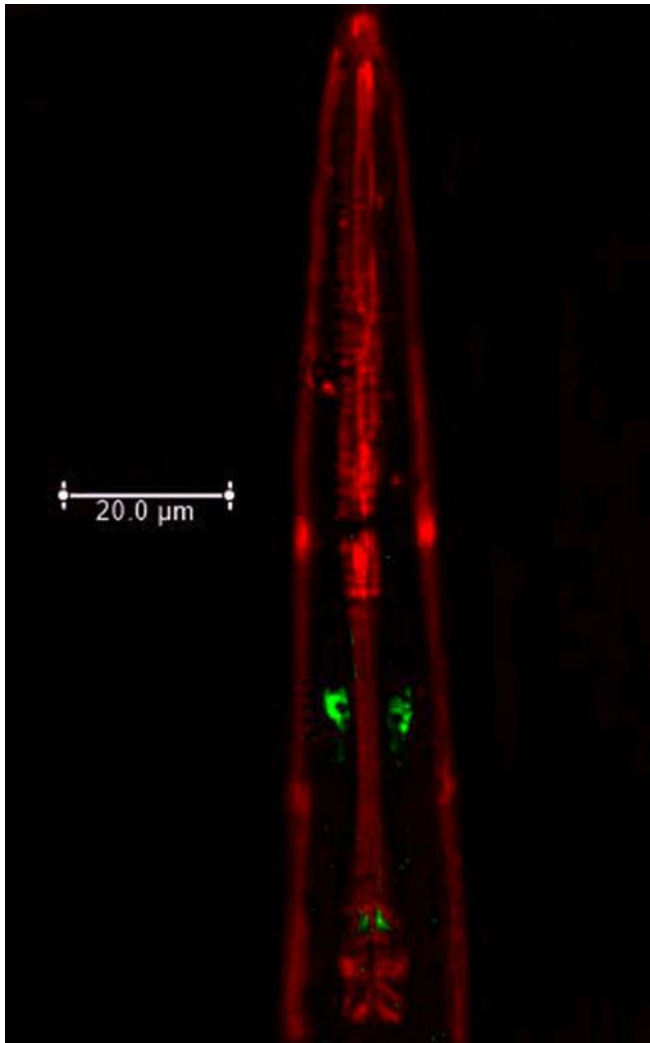

389

390 **Figure 4. Immunocytochemical localisation of FLP-21 (GLGPRPLRFamide) to paired**  
391 **neurons within the central nerve ring of *S. carpocapsae* IJs.** Positive FLP-21  
392 immunostaining is visible as green, muscle is counterstained red.

393

## 394 Discussion

395 RNA interference is an extremely important tool for the study of gene function in parasitic  
396 nematodes (Dalzell et al., 2012; Maule et al., 2011). Three independent reports of a  
397 functional RNAi pathway in the entomopathogenic nematode *Heterorhabditis bacteriophora*  
398 have been published. Ciche and Sternberg (2007) assessed the efficacy of RNAi through  
399 soaking egg / L1 stage *H. bacteriophora* in 5-7.5 mg/ml dsRNA targeting a number of genes  
400 which had been selected on the basis of phenotypic impact on the model *C. elegans*.

401 Demonstrable phenotypes and target transcript knockdown signified an active pathway.  
402 Moshayov, Koltai and Glazer (2013) employed the methodology of Ciche and Sternberg  
403 (2007) to study the involvement of genes in the regulation of IJ exsheathment (or 'recovery').  
404 Subsequently, Ratnappan et al. (2016) demonstrated that microinjection was also a suitable  
405 method for introducing dsRNA into hermaphrodite gonads, effectively triggering the RNAi  
406 pathway in F1 progeny. To date, no such assessment of a functional RNAi pathway has  
407 been published for *Steinernema* spp.

408

409 The RNAi pathway of *S. carpocapsae* has been characterised by BLAST and validated  
410 through silencing *Sc-flp-21* in IJs. Our data indicate that neuronal cells are sensitive to RNAi  
411 in *S. carpocapsae* IJs, and that knockdown is highly sequence specific. Like other parasitic  
412 nematodes *S. carpocapsae* encodes an expanded set of WAGO-1 (R06C7.1) family AGOs  
413 (19 in total) which function primarily with secondary siRNAs (22G RNAs) in *C. elegans*,  
414 along with CSR-1 which is also conserved. Whilst RDE-1 is primarily responsible for  
415 triggering the onset of an exogenous RNAi response, acting upstream of secondary siRNAs  
416 (22G RNAs), it is not conserved in *S. carpocapsae* (Billi et al., 2014; Dalzell et al., 2011).  
417 Our observation of RNAi sensitivity in *S. carpocapsae* reveals that RDE-1 is not required to  
418 trigger an exogenous RNAi response, however the functional significance of AGO  
419 homologue expansions relative to *C. elegans* remains to be determined. The lack of SID-2  
420 seems to correlate with our observation that relatively high amounts of dsRNA are required  
421 to trigger the RNAi pathway by oral delivery.

422

423 The nearest non-target gene sequence within the *S. carpocapsae* genome represents an  
424 uncharacterised predicted gene (*L596\_g5821.t1*). The *Sc-flp-21* dsRNA shared high levels  
425 of sequence similarity over a 21 bp stretch of *L596\_g5821.t1* (20 of 21 bp shared), however  
426 qRT-PCR indicates that *L596\_g5821.t1* had not been silenced, which could suggest: (i) the  
427 level of sequence similarity was either insufficient for gene knockdown; (ii) dsRNA was not  
428 diced in the correct register to produce this exact 21 bp sequence within a significant

429 population of siRNAs; or (iii) the *L596\_g5821.t1* gene is not expressed in cells / tissue which  
430 is sufficiently susceptible to dsRNA delivered under the conditions tested. In order to trigger  
431 significant knockdown of *Sc-flp-21*, 48h continuous exposure to dsRNA was required in the  
432 presence of 50 mM serotonin. Reducing dsRNA exposure time lead to a corresponding  
433 reduction in *Sc-flp-21* knockdown, as did a reduction of dsRNA amount from 5mg/ml to  
434 1mg/ml over a 48h time-course. Phenotypes which developed following 48h dsRNA  
435 exposure were not observed across any of the experimental variations which resulted in  
436 decreased gene knockdown (shorter exposure timeframes / lower dsRNA amounts).

437

438 The neuronal RNAi sensitivity of *S. carpocapsae* IJs, and the ease of behavioural assays  
439 makes these species ideal models for studying the neurobiology of nictation. Within the  
440 Steinernematid EPNs, a number of species also display a highly specialised jumping  
441 behaviour which can be triggered in nictating IJs on exposure to host Insect volatiles  
442 (Castelletto et al., 2014). Silencing *Sc-flp-21* triggers pleiotropic effects on lateral dispersal,  
443 hyperactive nictation and jumping phenotypes. The frequency of standing phenotypes  
444 which is observed of nictating IJs which are stimulated by host volatile cues was found to  
445 differ between *flp-21*-silenced IJs exposed to mealworm volatiles, but not waxworm volatiles  
446 (Fig. 3C-D). Specifically, the standing phenotype is enacted by IJs which adopt a temporary,  
447 upright torpid stance. The mechanistic significance of torpid standing nictation relative to  
448 hyperactive waving nictation is not clear, however we observe that both can be triggered by  
449 insect volatiles under the conditions tested here. The waxworm and mealworm headspace  
450 SPME GC-MS profiles are expanded relative to those presented by Hallem et al. (2011), and  
451 likely reflects the increased sensitivity of analysis in this study. These data could provide a  
452 valuable tool for comparative analysis of neurobiology and host-finding behaviours across  
453 EPN species.

454

455 Given the redundancy of FLP-21 and FLP-18 in activating NPR-1 (and other NPRs), further  
456 work is required to understand the neuronal basis of nictation and jumping behaviours in *S.*

457 *carpocapsae* and other EPN species. Of particular interest is the function of FLP-21 in EPN  
458 species which do not nictate or jump, such as *Steinernema glaseri* and *H. bacteriophora*.  
459 Likewise, it is not yet known if, or how FLP-21 signalling is differentially regulated in  
460 *Steinernema feltiae* which displays a less pronounced nictation behaviour involving partial  
461 lifting of the IJ anterior from the substrate surface (Campbell and Gaugler, 1993).  
462  
463 Collectively, these data provide the first mechanistic insight to a behaviour which may have  
464 implications for biocontrol efficacy. Through isolating genes and signalling pathways which  
465 coordinate these behaviours, efforts to identify molecular markers of desired behaviours and  
466 traits could facilitate the identification of more suitable isolates and strains for biocontrol use,  
467 and the enhancement of current strains through selective breeding approaches. The  
468 selection or manipulation of behavioural tendencies could lead to strains which are capable  
469 of operating within new ecological niches, expanding their utility.

470

## 471 **Acknowledgements**

472 Waxworms infected with *S. carpocapsae* (ALL) were kindly provided by Ali Mortazavi and  
473 Marissa Macchietto, University of California, Irvine. Morris was supported by a PhD  
474 studentship from the Business Alliance Fund, Queen's University Belfast; Wilson was  
475 supported by a PhD studentship from the EUPHRESKO Plant Health Fellowship Scheme;  
476 Warnock and Cox were supported by a Bill and Melinda Gates Foundation grant. Sturrock  
477 was supported by a PhD studentship from the Department of Education and Learning.  
478 Dalzell was supported by a Leverhulme early career fellowship.

479

480

481

482

483

## 484 **References**

- 485 Altschul SF, Gish W, Miller W, Myers EW, Lipman DJ. 1990. Basic local alignment search  
486 tool. *J Mol Biol* 215: 403–410.
- 487
- 488 Billi AC, Fischer SEJ, Kim JK. 2014. Endogenous RNAi pathways in *C. elegans* (May 7,  
489 2014), *WormBook*, ed. The *C. elegans* Research Community, WormBook,  
490 doi/10.1895/wormbook.1.170.1,<http://www.wormbook.org>.
- 491
- 492 Brown FD, D'Anna I, and Sommer RJ. 2011. Host-finding behaviour in the nematode  
493 *Pristionchus pacificus*. *Proceedings of the Royal Society B* 278: 3260-3269. doi:  
494 10.1098/rspb.2011.0129
- 495
- 496 Campbell JF, Gaugler R. 1993. Nictation behaviour and its ecological implications in the host  
497 search strategies of entomopathogenic nematodes (Heterorhabditidae and  
498 Steinernematidae). *Behaviour* 126(3-4): 155-169.
- 499
- 500 Campbell JF, and Kaya HK. 1999. How and why a parasitic nematode jumps. *Nature* 397:  
501 485-486. doi:10.1038/17254.
- 502
- 503 Castelletto ML, Gang SS, Okubo RP, Tselikova AA, Nolan TJ, Platzer EJ, Lok JB, Hallem  
504 EA. 2014. Diverse host-seeking behaviors of skin-penetrating nematodes. *PLoS Pathogens*  
505 10, no. 8: e1004305.
- 506
- 507 Ciche TA, Sternberg PW. 2007. Postembryonic RNAi in *Heterorhabditis bacteriophora*: a  
508 nematode insect parasite and host for insect pathogenic symbionts. *BMC Dev Biol* 7: 101.  
509 doi: 10.1186/1471-213X-7-101.
- 510



- 511 Coates JC, de Bono M. 2002. Antagonistic pathways in neurons exposed to body fluid  
512 regulate social feeding in *Caenorhabditis elegans*. *Nature* 419: 925-929.  
513 doi:10.1038/nature01170  
514
- 515 Conine CC, Batista PJ, Gu W, Claycomb JM, Chaves DA, Shirayama M, Mello CC. 2010.  
516 Argonautes ALG-3 and ALG-4 are required for spermatogenesis-specific 26G-RNAs and  
517 thermotolerant sperm in *Caenorhabditis elegans*. *Proc. Natl. Acad. Sci. U. S. A.* 107, 3588-  
518 3593.  
519
- 520 Dalzell JJ, McVeigh P, Warnock ND, Mitreva M, Bird DM, Abad P, Fleming CC, Day TA,  
521 Mousley A, Marks NJ, Maule AG. 2011. RNAi effector diversity in nematodes. *PLoS*  
522 *Neglected Tropical Diseases*, 5(6), p.e1176.  
523
- 524 Dalzell JJ, Warnock ND, McVeigh P, Marks NJ, Mousley A, Atkinson L, Maule AG. 2012.  
525 Considering RNAi experimental design in parasitic helminths. *Parasitology* 139(5): 589 –  
526 604. doi:10.1017/S0031182011001946.  
527
- 528 Dillman AR, Guillermin ML, Lee JH, Kim B, Sternberg PW, and Hallem EA. 2012. Olfaction  
529 shapes host-parasite interactions in parasitic nematodes. *Proc Natl Acad Sci U S A* 109(35):  
530 E2324-2333. doi: 10.1073/pnas.1211436109  
531
- 532 Ezcurra M, Walker DS, Beets I, Swoboda P, Schafer WR. 2016. Neuropeptidergic Signaling  
533 and Active Feeding State Inhibit Nociception in *Caenorhabditis elegans*. *The Journal of*  
534 *Neuroscience* 36(11): 3157-3169; doi: 10.1523/JNEUROSCI.1128-15.2016  
535
- 536 Geldhof P, Visser A, Clark D, Saunders G, Britton C, Gilleard J, Berriman M, Knox  
537 D. 2007. RNA interference in parasitic helminths: Current situation, potential pitfalls and  
538 future prospects. *Parasitology* 134: 609–619.

539

540 Hallem EA, Dillman DR, Hong AV, Zhang Y, Yano JM, DeMarco SF, Sternberg PW. 2011. A  
541 sensory code for host seeking in parasitic nematodes. *Curr Biol* 21, 377-383.

542

543 Han T, Manoharan AP, Harkins TT, Bouffard P, Fitzpatrick C, Fitzpatrick C, Chu DS, Thierry-  
544 Mieg D, Thierry-Mieg J, Kim JK. 2009. 26G endo-siRNAs regulate spermatogenic and  
545 zygotic gene expression in *Caenorhabditis elegans*. *Proc. Natl. Acad. Sci. U. S. A.* 106,  
546 18674-18679.

547

548 Holterman, M., van der Wurff, A., van den Elsen, S., van Megen, H., Bongers, T.,  
549 Holovachov, O., Bakker, J. and Helder, J., 2006. Phylum-wide analysis of SSU rDNA reveals  
550 deep phylogenetic relationships among nematodes and accelerated evolution toward crown  
551 clades. *Molecular biology and evolution*, 23(9), pp.1792-1800.

552

553 Howe KL, Bolt BJ, Cain S, et al. 2016. WormBase 2016: expanding to enable helminth  
554 genomic research. *Nucleic Acids Res* 44(D1): D774-80. DOI: 10.1093/nar/gkv1217.

555

556 Knox DP, Geldhof P, Visser A, Britton C. 2005. RNA interference in parasitic nematodes of  
557 animals: A reality check? *Trends in Parasitology* 23: 105–107.

558

559 Lee H, Choi MK, Lee D, Kim HS, Hwang H, Kim H, Park S, Young-ki P, Junho L. 2012.  
560 Nictation, a dispersal behaviour of the nematode *Caenorhabditis elegans*, is regulated by IL2  
561 neurons. *Nature Neuroscience* 15(1): 107. DOI: 10.1038/nn.2975.

562

563 Lee JH, Dillman AR, Hallem EA. 2016. Temperature-dependent changes in the host-seeking  
564 behaviors of parasitic nematodes. *BMC biology*, 14(1), 1.

565

- 566 Li C, Kim K. 2014. Family of FLP peptides in *Caenorhabditis elegans* and related  
567 nematodes. *Frontiers in Endocrinology* 5: 150. doi: 10.3389/fendo.2014.00150
- 568 Maule AG, McVeigh P, Dalzell JJ, Atkinson L, Mousley A, Marks NJ. 2011. An eye on RNAi  
569 in nematode parasites. *Trends in Parasitology* 27(11): 505-513. doi:  
570 10.1016/j.pt.2011.07.004.
- 571
- 572 McWilliam H, Li W, Uludag M, Squizzato S, Park YM, Buso N, Cowley AP, Lopez R.  
573 Analysis Tool Web Services from the EMBL-EBI. 2013. *Nucleic acids research* Jul;41(Web  
574 Server issue):W597-600 [doi:10.1093/nar/gkt376](https://doi.org/10.1093/nar/gkt376)
- 575
- 576 Moshayov A, Koltai H, Glazer I. 2013. Molecular characterisation of the recovery process in  
577 the entomopathogenic nematode *Heterorhabditis bacteriophora*. *International Journal for*  
578 *Parasitology* 43: 843-852.
- 579
- 580 Pereira L, Kratsios P, Serrano-Saiz E, Sheftel H, Mayo AE, Hall DH, White JG, LeBoeuf B,  
581 Garcia LR, Alon U, Hobert O. 2015. A cellular and regulatory map of the cholinergic nervous  
582 system of *C. elegans*. *eLife* 4:e12432. doi: <http://dx.doi.org/10.7554/eLife.12432>
- 583
- 584 Pfaffl MW. 2001. A new mathematical model for relative quantification in real-time RT-PCR.  
585 *Nucleic Acid Res* 29(9), e45.
- 586
- 587 Ratnappan R, Vadnal J, Keaney M, Eleftherianos I, O'Halloran D, Hawdon JM. 2016. RNAi-  
588 mediated gene knockdown by microinjection in the model entomopathogenic nematode  
589 *Heterorhabditis bacteriophora*. *Parasites & Vectors* 9: 160. doi: 10.1186/s13071-016-1442-4.
- 590
- 591 Schroeder NE, Androwski RJ, Rashid A, Lee H, Lee J, Barr MM. 2013. Dauer-Specific  
592 Dendrite Arborization in *C. elegans* is regulated by KPC-1/Furin. *Current Biology* 23(16):  
593 1527-1535. DOI: 10.1016/j.cub.2013.06.058.

594

595 Sijen T, Fleenor J, Simmer F, Thijssen KL, Parrish S, Timmons L, Plasterk RH, and Fire A.

596 2001. On the role of RNA amplification in dsRNA-triggered gene silencing. *Cell* 107, 465-

597 476.

598

599 Simmer F, Tijsterman M, Parrish S, Koushika SP, Nonet ML, Fire A, Ahringer J, Plasterk RH.

600 2002. Loss of the putative RNA-directed RNA polymerase RRF-3 makes *C.*

601 *elegans* hypersensitive to RNAi. *Curr. Biol.* 12, 1317-1319

602

603 Torrini G, Mazza G, Carletti B, Benvenuti C, Roversi PF, Fanelli E, De Luca F, Troccoli A,

604 Tarasco E. 2015. *Oscheius onirici* sp. n. (Nematoda: Rhabditidae): a new entomopathogenic

605 nematode from an Italian cave. *Zootaxa* 3937(3), pp.533-548.

606

607 Vandesompele J, De Preter K, Pattyn F, Poppe B, Van Roy N, De Paepe A, Speleman F.

608 2002. Accurate normalization of real-time quantitative RT-PCR data by geometric averaging

609 of multiple internal control genes. *Genome Biol.* 3, RESEARCH0034.

610

611 Vasquez-Rifo A, Jannot G, Armisen J, Labouesse M, Bukhari SIA, Rondeau EL, Miska EA,

612 and Simard MJ. 2012. Developmental Characterization of the MicroRNA-Specific *C.*

613 *elegans* Argonautes *alg-1* and *alg-2*. *PLoS One* 7(3): e33750 doi:

614 10.1371/journal.pone.0033750

615

616 Viney ME, and Lok JB. *Strongyloides* spp. 2007. WormBook, ed. The *C. elegans* Research

617 Community, WormBook, doi/10.1895/wormbook.1.141.1, <http://www.wormbook.org>.

618

619 Wang XD, and Ishibashi N. 1999. Infection of the Entomopathogenic Nematode,

620 *Steinernema carpocapsae*, as Affected by the Presence of *Steinernema glaseri*. *J Nematol*

621 31(2): 207-211.

622

623 White GF. 1927. A method for obtaining infective nematodes larvae from cultures. *Nature*  
624 66: 302-303.

625

626 Yassin L, Gillo B, Kahan T, Halevi S, Eshel M, Treinen M. 2001. Characterisation of the  
627 DEG-3/DES-2 receptor: a nicotinic acetylcholine receptor that mutates to cause neuronal  
628 degeneration. *Molecular and Cellular Neuroscience* 17: 589-599.

629 doi:10.1006/mcne.2000.0944

630

631 Zhang F, Bhattacharya A, Nelson JC, Abe N, Gordon P, Lloret-Fernandez C, Maicas M,  
632 Flames N, Mann RS, Colón-Ramos DA, Hobert O. 2014. The LIM and POU homeobox  
633 genes *ttx-3* and *unc-86* act as terminal selectors in distinct cholinergic and serotonergic  
634 neuron types. *Development* 141(2): 422–435. doi: 10.1242/dev.099721

635

636

637

638

639

640

641

642

643

644

645

646

647

648

649

## 650 Supplemental Data

### 651 Figure S1. Alignment of *Sc-flp-21* dsRNA against most similar non-target *S.* 652 *carpocapsae* gene (McWilliam et al., 2013).

```
653 CLUSTAL O(1.2.1) multiple sequence alignment
654
655
656
657 exon_14_L596g5821      CAAATTCAAGAGCGCAGCAGGGATAAAGGCTTGTAGCTGGCCGCAAAGCCATCAGACGC
658 Sc-flp-21_dsRNA      -----
659
660
661 exon_14_L596g5821      TAATTGCGCCAGAACTCGGTGACGCTAGTATTTCGGCGATCTTGCAAATGCATTGGACAAG
662 Sc-flp-21_dsRNA      -----
663
664
665 exon_14_L596g5821      TTTCTCCGTCAGGTCAGCCCTGAGAACTGCATCGCTGACATGCATCCTTTCCAGATGGC
666 Sc-flp-21_dsRNA      -----
667
668
669 exon_14_L596g5821      CAAGTATTGATCGATGATGTGGCAAACATCTACATAAGAAGTGTGCCGAATCTCCGA
670 Sc-flp-21_dsRNA      -----TTCTG
671                                     * * .
672
673 exon_14_L596g5821      AGACGCGATTTGGATTGTGGCGTCGAGTTGGCAAGCCAGTTCACGCGCCCGAACG--CC
674 Sc-flp-21_dsRNA      AGCCGCT-----ATCTGAGCCAGTTCACGCGCCCGAATACGAC
675 **.*.*                : .*****.*****.*.*
676
677 exon_14_L596g5821      TTCAGCTTCGCCGTGTCCATCCA---CTTCACG-----ACGACTCGGTCGAAAATCT
678 Sc-flp-21_dsRNA      CCCAGCGCTACATGTACTTCGATCAGCGCTCGATGAAGCGAGGCTCGGTCCCTC-----
679          **** * .*.***.*:* *      *:*      * *.***** :.
680
681 exon_14_L596g5821      GGCTCCAGTCGGATTTGTCCAGCCGGTATTTCTGCTTTGGAAGACGGTACTGACGAAATT
682 Sc-flp-21_dsRNA      -----GACCTCTCCGCTTTGGTTAACTGCTA-----GAAAT
683          *. .* ** *****:.* * :.      .**:*
684
685 exon_14_L596g5821      CTGCGCTGCCAGATGTACCTTCAGAATCGTGATCAAAAGTTCTTCATTGTGCGCTTCGC
686 Sc-flp-21_dsRNA      CGTGATATTTCAGAATTCTC-----CTCTTTGATCTCTTTGATTGTTTGTC
687 * *. . * *****: * . *      .***:::*** :* . * * *
688
689 exon_14_L596g5821      TCTTCGACGCGCTCATCAT
690 Sc-flp-21_dsRNA      CCTGCGACT-----
691          ** ****
692
693
694
695
696
697
698
699
700
701
702
703
```

704 **Table S2. *Steinernema carpocapsae* argonaute proteins.**

| <b><u>AGOs Protein List</u></b> | <b><u>Homologues</u></b> | <b><u>Accession *</u></b> |
|---------------------------------|--------------------------|---------------------------|
| ALG-1                           | x2                       | L596_g7718.t1             |
| ALG-2                           | x1                       | L596_g16709.t1            |
| ALG-3 (T22B3.2)                 | x2                       | L596_g3457.t1             |
| ALG-4                           |                          |                           |
| CSR-1                           | x1                       | L596_g20174.t1            |
| C04F12.1                        | x1                       | L596_g11107.t1            |
| C14B1.7a                        |                          |                           |
| ERGO-1                          |                          |                           |
| HPO-24                          |                          |                           |
| HRDE-1 (WAGO-9)                 | x1                       | L596_g11197.t1            |
| NRDE-3 (WAGO-12)                |                          |                           |
| PPW-1 (WAGO-7)                  |                          |                           |
| PPW-2 (WAGO-3)                  |                          |                           |
| PRG-1                           | x1                       | L596_g25491.t1            |
| RDE-1                           |                          |                           |
| SAGO-2 (WAGO-6)                 |                          |                           |
| SAGO-1 (WAGO-8)                 |                          |                           |
| T23B3.2                         | x1                       | L596_g21112.t1            |
| WAGO-1 (R06C7.1)                | x19                      | L596_g19943.t1            |
| WAGO-10 (T22H9.3)               | x2                       | L596_g19923.t1            |
| WAGO-11 (Y49F6A.1)              | x3                       | L596_g17524.t1            |
| WAGO-2 (F55A12.1)               | x1                       | L596_g16917.t1            |
| WAGO-4 (F58G1.1)                |                          |                           |
| WAGO-5 (ZK1248.7)               | x4                       | L596_g12936.t1            |

705

706 \* Accession numbers presented are the top returning hits for each RNAi pathway  
707 protein.

708

709

710

711

712

713

714

715

716

717 **Table S3. *Steinernema carpocapsae* non-argonaute RNA interference pathway**  
718 **proteins.**

| <u>Non AGO Protein List</u> | <u>Homologues</u> | <u>Accession *</u> |
|-----------------------------|-------------------|--------------------|
| AIN-1                       | x1                | L596_g5788.t1      |
| DCR-1                       | x1                | L596_g26648.t1     |
| DRH-1                       | x1                | L596_g26385.t1     |
| DRH-3                       | x1                | L596_g25860.t1     |
| DRSH-1                      | x4                | L596_g13580.t1     |
| EGO-1                       | X3                | L596_g919.t1       |
| EKL-1                       |                   |                    |
| ERI-1                       | x5                | L596_g16241.t2     |
| ERI-3                       |                   |                    |
| ERI-5                       |                   |                    |
| FKH-3                       |                   |                    |
| FKH-4                       |                   |                    |
| FKH-5                       | x1                | L596_g10448.t1     |
| PASH-1                      | x2                | L596_g24740.t1     |
| RDE-4                       |                   |                    |
| RRF-1                       | x1                | L596_g7841.t1      |
| RRF-3                       | x1                | L596_g11915.t1     |
| RSD-3                       | x1                | L596_g5786.t2      |
| RSD-6                       |                   |                    |
| SID-1                       |                   |                    |
| SID-2                       |                   |                    |
| TSN-1                       | x1                | L596_g28061.t1     |
| UNC-130                     | x1                | L596_g11813.t1     |
| VIG-1                       | x1                | L596_g22586.t1     |
| XPO-5                       |                   |                    |
| XRN-1                       | x1                | L596_g18210.t1     |
| XRN-2                       | x1                | L596_g10155.t1     |

719  
720  
721  
722  
723  
724  
725  
726  
727  
728  
729  
730  
731  
732



733 RNAi pathway proteins

734

735 >AIN-1 - L596\_g5788.t1

736 MWGEETGAETMTLNPWAGVSQQPQVWQNMNSRGNGNPSVANSVGSFAPNGGSVRPGSQQW  
737 DGGATPAGRSAWNPNPHAPRWTPSVNHGNASGWPNQQHWSVANSNGTYAEQTKKNMALG  
738 RSSGPNLNMSSQRFDSQGWGSKVDQGT PWDGTGNSGGVSQQMHGEGKEQWSNPTRWTQPPGT  
739 WPTPIVAPMVADWQQGQPRHDHWANHPTGGMVPSGGAWAQQALGVASSSEQGRVPYDPNP  
740 QTPGPWVAPQPAEMNNDMMWHDPNPKQKKIQKDVGTGIWGDPTSQIEIRRWKDLEAEGGE  
741 FPGGSDWGSNSSTQPTGWGDVGPAGQNDGTDWRGAQQALQGGWSDKVDQDRDLNNGGK  
742 SDLNQIQRGIQNAIANGALCPDGQSRLQWKKQKRGIGVGSPEEKMGVASSSDSNVPSLI  
743 AATKIMNIHGDWTPPSSVADDSAKSEDQVSSSGTNNEKESVKEASPTPPPTQLDDGPQ  
744 EFVPGKKWEWRDPNKVAEDPNATPGNCKPNPLMAAGNNMNAFNSAVNTANPYGPEVPS  
745 GNASTFWPNSQGFNVFGRDMYNSVRARLPSNGQFMPQRMSSGGYSNSNHNRMQTPPGK  
746 GVFIVLNHQGANETQLNFSCTRAGQLLNVASLGGQTVLLRYADSSSEGLVQLKLKADFPN  
747 ERIKTVSEEEVEKLLKNRSPTMSGSAWAPNSDTPLWSNGGSPLATGEIMSSQNVSNOED  
748 LNRQQY

749

750 >DCR-1 - L596\_g26648.t1

751 MSKFAGKPPQAPPRPQKLCGLKSTTRRRGLHFDGRAPAAKSRFQISLANFKFVWRRSGDS  
752 LADRLQKRDENWILKLRSPSDSAKAKNAAQMVVKATEINPNFFTPRDYQIELLEKALNYN  
753 TIIPLGTGSGKTFIAVLLIKEYTQLLLPKFSNGGKRAVFIIVDKVALVKQQADHIECHTEL  
754 KVAQFHGYMNTDVCNTREAFEKVIEDSQVLVLTAQIFLMLLDHAI FSDRVPVIVMDECH  
755 HVLGGKHPYRLIVQRYSELSEETRPRMLGLTASLINNKTAPELEALLRQLETIMKCRIE  
756 ASSDIISVAKYGARPKELVIACRDNDFAEDWIRVCLKSLQNLRESAANCLDFHPDLVDVP  
757 RKSVEAATKILSVLQQMGPCAWKVAMVWEKQLRKIHTSKSKASGLGEKQIAFLQNGES  
758 KIHETIKFEFEQKVKTVRSYEELKKYI PHKVERLLELLRYYHPNIQKTLQGGVKSLSAMV  
759 FVDQRYVAYAMNLLMKSLEYKWNQIDFGHLRSDFVIGFNGTSLGEESAGFHKRQETVLEKF  
760 RQSQLNLLFTTSVLEEGVDVKHCNLVIKFDSPGDFRSYIQSRGRARKQGAHYFMLTEAKN  
761 KLEFALNLRNFCEIERMLITRTVTIHDPEHQVPARNVDDVVQPYVVTSTGAKVTMSTAIA  
762 LINKYCAKLPSDVFTLVPQSCIEPVTVNGVTKFLATLSLPINSPFKEEIRLKT PMDTKK  
763 LAQMAVALEACRQLHEKNELNLDYLLPAGKDAIAATFLLDEDPDEYVPHMPHKAGSIRRKQ  
764 LYDKKMDLLVEASGAANPKRRKIANPLDNDYFFGFLSKRILPEVPSFPPIFPRQGKVLVSI  
765 KLCKNQITLDEETFERAMKFHEYLFDDVLGLAKQGFVEFVPRHAPIATVIVPLKREHAV  
766 YDLDRVYLSNILEYRRI PYTPSEEEERTFQFREEDFTDAIVVPWYRNQDVFYDVAVINHS  
767 LTPASGFPDGNYNFREYMKRYNLEIFNETQPLLDVDYTSRNMNLVMPRIPTRSQGKEK  
768 KSDRTQHQMVPPELVNVHPIPASLWNSIVTLPTI IYRANALLLADELRELICAEALGPND  
769 NSVHICWEPLDYVTSYSEDAQLPINKLSHLEKDLEAERAKARAENPEPEIVDMEDDSSND  
770 GFNIGVWDPKLGDDGELAGRI LTVFPFMASSARTDEEIADEAADMIVTSGNLNNGNMSDD  
771 EDDQGEMKMLMDYAH IYKNDSSSFLPVRDNIEELGWDADIGQLNISEDAFPVSI TGTAS  
772 IDGKSLMKDIASVLDPSFAGNGVASANGSAPNGSGDAVFAKSKPVATRDLDSAFDDRDA  
773 LIRGENESLNLIEYFMSDNDSEEVERMKKASLEIESSRPHLENFPVVEVEEEEGTPQKAI  
774 EIDNSLFTNPNVLQPEINAYTDGDVGERSEVARVI PKTTFMKPDVKVNFTDEGMPECSAG  
775 VSPCVLLQALTL SHASDGINLERLETVGDSFLKFAVTDYLFHEHKEQHEGKLSFARSKEV  
776 SNYNLYRIGKKNLPSILVASKFEPTDSWLP CYMPTGDFKGPNAEDAEATDKFMDAVFE  
777 GKPI PQSKKPLTGWDEDNNEAEKVVDGIETINLLKNPTGNTQYDVNEEISPLPYNVMTQQ  
778 YISDKAIADTVEALIGAHLLQLGPKVALRFMRWLGLRVI SEQTVADEPLLRFLDTPEDPN  
779 RSNQELVSYIERFQLSSVEKTIGYRFNNKAYLLQAFTHASYKNRITSCYQRLEFLGDAV  
780 LDYMITRFLFQHRKKYSPGVLTDLRSALVNNTIFASLAVKYNFHKHFVAMCPGLHHMIEK  
781 FVRLCESQAKNTNFNSELYMVTEEEFDDGDEEDIEVPKALGDI FESLAGAIYLD SGRRLD  
782 VVWEVFNLMHDTIMECCEHPPKSPIRELLEREPDKARFSKLERIRENGKIRVTVDIQ GK  
783 CRFTGIGRSYRIAKCTAAKRALRYLRDLDKEREAACKASAHH

784

785 >DRH-1 - L596\_g26385.t1  
786 MNTHLKTSHPLSVINWDKFTPETPVAIRPEHFDLRPYQEELAHHALKGENTI IWAPTGSG  
787 KTIVAVHVIAQHLLKGNRKCFCVVPNVTLLEQQKRVCCERHMDAKVNI IKAESKAPFSGM  
788 VAASHIVLLTPQMLVNALQNTTEGKENFSLSVFSMIVLDECHHTAESHPYNVLMHHYHDV  
789 KLKGTGKSPQIVGLTASLGAGTSRNANEAFRHIQKLCANLDSPKISTVEKHKADLTGFAV  
790 ETKDRIRYVESNYRSKPFKDVMEMLMSELENGIFVHPAIACDPVKKAMIKEQVCRSSDAS  
791 STANYRSSASTRYSQAYQNWLGNALMITLPKVDLPSDARVEIMTRFRLKILYKMIELWA  
792 NFNGKCAMDYMKESGLPIPLPVHDIRRELVSYRNDNSDMLIEMCQLLVEKFGEGTDGA  
793 SPARVLIFVKEREYTYMLANI IDCCNELKALGVRPDFLISTNSGDGECRLNPEEQRSKLE  
794 KFRSGEINLLCSTVAEEGLDVAECNLVIKYNYASSDIAHVQRRGRRARHQNSYAVLFTH  
795 DKNLEQQENKNILSEELSNQAIALLRQMPQKMFEAEVQELVRKSYSDRVIERAAKETASL  
796 ALKDVGARTCTEFIGRSTDVRRHSNLSHLICDGS IWDRTCEESVSQENFLKTSELP I GK  
797 IYCNNCKEVWGRIVIFKGIAPVPI IACKGILLQNGRGERFPCA KWAGIKGRYFCPEEVKSV  
798 DLARLSAAPHRPQFLTVLMGETESRSL

799

800 >DRH-3 - L596\_g25860.t1  
801 MTSNGTRFELDYLTVITLDFILEPFFLFLALTKSTPSMWFYRIFLIAISLCNCAFSIV  
802 FFLLSAKFIPIDDAVCLISSHFALRSRVLWQLSMFFMMIQFQIVLLMLIYSSYEISHPL  
803 RPLNWRSKAVILAVFVFI FLPASLVLILEQQVIMGEIEEEKREKVPLSHVRLFRKEFLES  
804 GRINEAFIDKCEKFLSFDVVEILKCLFTINPGLARKFFFRQIRLKHPKESGII IPI IERC  
805 YGDDTEVLSELRLNKNASKERYLKI FSDDEFCAGDTLSTQIRPQPF IKNLAAKYGNRY  
806 EKMIKKVEALLKDKHEHDAACQILRSMPKIADDEDDSWWLHLLDIDC DMPHNRACLVLL  
807 DVDYRNI IDMFRAEQRAKRTPAIQGKDEVMFDETI SLDLREFRGQEPYMEHRETVDENLI  
808 DDPDKIVLRDYQEEQMEGVRKGNTIVCAPTGS GKT I IAAQTLLLEHFKENEKARAVMFVPT  
809 IPLVEQQAQLLTRFLRKRKYILTASGAERVVSLGRKMLSADVVVITPQLFYNYMTDPRES  
810 ERIYISDFTLFI FDECHHCDSNHPYRKITKRISAFEGKKPHVVGLTASVGVGTKTMNPQE  
811 AVDHMIRICANMTAQSI TTVQRCLKSLDEKVRIPDDYIRT VHRDLESPFRGKIAEVLGKF  
812 VYIAEEKLKN TVLAGGEFESFPDKRKVCQFFGFVKRLKNELEARNQKVEDRNALI YTLARI  
813 EVLYKLFNLSDLLPARYAAHV LKEFN DENK DGLQEKYKHYLRELGEAAIKNEERDMNKDI  
814 LVTLKEILVDQYQKDPFSKTLIFVSTRDLARDLSLYLRDQWDKYGLPRKVKPTREGEDSE  
815 KTYKPVSYITSSNQATSAGGLTAQQQRETVAHF RSGHLLV L VATSVADEGLDIAECNLII  
816 KYNTSESSELKLIQRRGRARAKQSSSILLALDGAIEKAEYDGMLREKLMYAAIKHLHTLP  
817 DTHVYRLIEAKAQQLLVDEKEAEERAKQRKEEASEEVWIVACKKCSEQLTTTGS LRNAGD  
818 KRVASCDPSIWEKLVGNQKAESHGNASLEISVAVCSNGDCDNTIATLGT DGNTFMPFL  
819 RAQSVSLYRQAEYDADNREGKQSLKKWRSLEAGEYNI VLRSIDDEDRKRMCS SWESQNSE  
820 KAKEIVQKRQDQRAFKRARYLTKE SRNRELAKKVI LKQKEDPNAEEDDYGYSSIADDKIR  
821 GEDLEKVKIKAEDFAQVLHSEPNYLSAMKGYEAEVSDNSDNDYE

822

823 >DRSH-1 #1 - L596\_g13580.t1  
824 MEDPGCSGTQKLFEGAKRTLKREDAQENEKTENKEQLL TESDVFKRLAEIDL TTEESTA  
825 NSPDPSKIQDLSKFTVAVSKRTISEPDASEFYVKTENGDTIGTDRLKTVHEAMQFRVLDV  
826 IDMARREQPQSEPTMPTFHENCKCGHVSESEADSSSGSESEEDDENADLSNVSDANKHS  
827 LVAKREIARKQQHPAGLSQEMCFNEPGQMNDGPACRCSWASKQSGIRHSIFVGEERVEPC  
828 NPMSNLRLNLHHYFMKVT PNPVEQSRNASLIYHNDKGYVFEGFSVFFHRKLPQFFPQTPV  
829 NKLSQEFVVFIEEKAPEQFTVHDLESFHTYMF D H L L E M Y D L N R R A K D V F D G C P V Y H C M P  
830 RFVFKDYATEAVEVLPM S A V L H H I A G A F Q P V F D D R L V Q K I R R D E N L F H N M S S H M K G Q I F V  
831 NPSKRPATIRVDLIERQDPYTKSVNKDFHPVLTHI GLRPSVYTFSAKPAYQQAMKKYLRT  
832 RHLMSLQGKLSYEDKQKLVEQEANIRKLKAEAQHKRDMVMSVTSRGFYSTTFYPDIVQHA  
833 VLLTLACSHVRYHWCLETFEKRIGYSFKNRTLLELAL THPSFRANYGTNSDHTRNALANC  
834 GLRIDKARNDNRNSQVDRPSRKRGYENLREVM SMKGTEKAVLSPVHHNERLEFLGDSVIE

835 FITTIHLFYMLTDLDEGALATYRSALVQNKHLAVLAKKIGLDEFMLYSHGPDLCHESDFR  
836 HAMANTYEAMMAAVYLDLDCDLNECDRI FADTLFMDEKEEKSKEKLAWTKLLDHPLKRDNPY  
837 GDRHLIPKIDSLQLLTQFEDSIGIKFKHIRVLAKAFTRRCIGYNNLTHGHNRLEFLGDT  
838 VLQLVTTTEYLYKHFPNHHEGHLSSLRTCLVCNRTQGVICDDLAMAKYLVI PPNSRKHTHV  
839 MSIRWKERADLVESFIGALYVDRGLECYCKTFCKVCFPPRLKYFIESQRWNDPKSQLQONC  
840 IALRDGKNEPEIPEYRVIAIEGPTNTRLRVRGVYFRAVRLADGVGHTVHQAQMNAENAL  
841 KQHADMWPSMSTKKTEKKASHNNWERASYRREGNSAKYERSSSNRQGGGNDYRNDLSGQDY  
842 RKVPDGRESRRNSQNSDAPRSTFNAPYMQONRRPYDNGQEKPHRSRNGQQYDDRSNQNDL  
843 RNGRNNHAPSQNEPSRFGPTRHRHDHEFRKPYDRPQHDFRHF'TNDRRPHNESQNTSYGR  
844 DQNKGEAYSGVRSRYYESQSERPPYRPSGSQKDSNPVYQRNAQPYRQQNNEQNSCRQPTW  
845 QDSQNKPH

846  
847 > DRS-1 #2 - L596\_g13580.t2  
848 MPRFVFKDYATEAVEVLPMSAVLHHIAGAFQPVFDDRLVQKIRRDENLFHNMS SHMKGQI  
849 FVNPSKRPATIRVDLIERQDPYTKSVNKDFHPVLTHIGLRPSVYTFSAKPAYQQAMKKYL  
850 RTRHLSLQGLKSYEDKQKLVEQEANIRKLKAEAQHKRDMVMSVTSRGFYSTTFYPDIVQ  
851 HAVLLTLACSHVRYHWCLETFEKRIGYSFKNRTLLELALHPSFRANYGTNSDHTRNALA  
852 NCGLRIDKARNDNRNSQVDRPSRKRGYENLREVMSMKGTEKAVLSPVHHNERLEFLGDSV  
853 IEFITTIHLFYMLTDLDEGALATYRSALVQNKHLAVLAKKIGLDEFMLYSHGPDLCHESD  
854 FRHAMANTYEAMMAAVYLDLDCDLNECDRI FADTLFMDEKEEKSKEKLAWTKLLDHPLKRDN  
855 PYGDRHLIPKIDSLQLLTQFEDSIGIKFKHIRVLAKAFTRRCIGYNNLTHGHNRLEFLG  
856 DTVLQLVTTTEYLYKHFPNHHEGHLSSLRTCLVCNRTQGVICDDLAMAKYLVI PPNSRKHT  
857 HVMSIRWKERADLVESFIGALYVDRGLECYCKTFCKVCFPPRLKYFIESQRWNDPKSQLQQ  
858 NCIALRDGKNEPEIPEYRVIAIEGPTNTRLRVRGVYFRAVRLADGVGHTVHQAQMNAEN  
859 ALKQHADMWPSMSTKKTEKKASHNNWERASYRREGNSAKYERSSSNRQGGGNDYRNDLSGQ  
860 DYRKVPDGRESRRNSQNSDAPRSTFNAPYMQONRRPYDNGQEKPHRSRNGQQYDDRSNQNDL  
861 DLNNGRNNHAPSQNEPSRFGPTRHRHDHEFRKPYDRPQHDFRHF'TNDRRPHNESQNTSY  
862 GRDQNKGEAYSGVRSRYYESQSERPPYRPSGSQKDSNPVYQRNAQPYRQQNNEQNSCRQP  
863 TWQDSQNKPH

864  
865 > DRS-1 #3 - L596\_g28273.t1  
866 MTTSPDIELFNISSDEEDDLLDFPKMAPARKATQAPSREKHCQAELSRACEAFSVQTLDA  
867 IGVARCRAADGNAAENG FETLLGCPCPKSQLGTGLRHGFYKPEECIPACDKEQINPPNLH  
868 HYVLKVDSPNVPQVTRIMHGNKEFVFDGFSLFFHQKLPVELLCTPLKIALGTSATVTLLP  
869 ARSPKGFNVKSLDWFHKYLFEEILSFPMSPQNQC SFYHCLPHFVHKEGKNVHLLPMIA  
870 VLQHLQANFKPIFGVNDL FKNHRGENVVAKIRGQVFNPTKTFSALRLDHVEDPRDLLGQ  
871 PKLVSFTKWKKS VHTRSRTKRKFMNRIKSDQTERPFFENAVPSKGYKTYGLYPDVIQHA  
872 LLLVPTVNYMRHFHNLQILEVRIGYTFKDKTLLELALHGNFRGSYGPHRLIVKRQNETF  
873 GFRTNLDTATKELKRPSNNGSKREPGQTYERLEFLGDAVLGFIAATHLFYMFMSMADEGTL  
874 SLFKSKNVDNSRLCDLAKRSGLQQF ILYECDRNLI IDEGSHPLLANI FEALFGAIYLDGG  
875 LNECDRVFADITFRNEQNGEENKLAWKNMLEHPLKRENPHGDRHLIPKCKSLLLLLTKFEK  
876 SINAKFKHIRVLAKAFSRACIGLNNLTHGNSQRLEFFGDITLQFLTTEFLFHKFP SHSEG  
877 ALSLLRQGLVNNKALSTICDKLSMRTYIVVPEDMEKMEHVWILTEKSKADLVECMKRWKR  
878 KAGRTRNPPSKKRSTSSAEALDAQIYLDTKFSATR DHQIIDLTMS PSTSGTFNTLKLKFS  
879 LFRGKQLGVGKERTIKKGEMEAAKNALESITEAVFKDMKRKLL EKKIDVPRTGVC SYPS  
880 L

881  
882 > DRS-1 #4 -L596\_g13580.t3  
883 MEDPGCSGTQKLFEGAKRTLDKREDAQENENEKTENKEQLL TESDVFKRLAEIDLTTTEESTA  
884 NSPDPSKIQDLSKFTVAVSKRTISEPDASEFYVKTENGDTIGTDRLKTVHEAMQFRVLDV  
885 IDMARREQPQSEPTMPTFHENCKCGHVSESEADSSSGSESEEDDENADLSNVSDANKHS

886 LVAKREIARKQQHPAGLSQEMCFNEPGQMNDGPACRCSWASKQSGIRHSIFVGEERVEPC  
887 NPMSSNLRLNLHHYFMKVTPNPVEQSRNASLIYHNDKGYVFEGFSVFFHRKLPQFFPQTPV  
888 NKLSQEFEVVFIIEEKAPEQFTVHDLSEFHTYMFHDHLEMYDLNRRAKDVFDFGCPVYHCMP  
889 RFVFKDYATEAVEVXXXXPKLQLLLLLTVCAFH

890

891 >EGO-1 #1 - L596\_g919.t1

892 MLAAENDRPPTSDDSQMELKEGGTAVMDVKARDAPSKKAPRVFPESDDSDLVRIITEAER  
893 DRRMQLKLDKADFQKKVIHEMSADIAGCSASCKRVSEVPGNVNGVPKSAHFVELTAPEW  
894 DRAFFPMVHNFLQISKDYAETKKANALMQVSNPTLLREDFEPTNKLLPLQSFAGCMRSP  
895 FEFTNHHEFHSSSENAELLHDYFNHCREEPNHKEAMTIDFNHDLGDSFVKFASEEENGYF  
896 VYMLKLIYNKVRRIIVNFERLDSTTSTVHGVKLFLLFNNPIEVRRSQIKGRKGDYWR  
897 DTNGDRCLTWNNEERQAIADCLNLKLFQFEKLEKNVLYNILSRLRRCNVILEFSSVQE  
898 VPFKGVDRPMPFGDHAIAARKLKEMDKYDVNYLIEALCSRGAVINDQFLESEKTRDDYVEM  
899 ILEDYERNFSFITIAALERILNIIDEHLEVRDIHLLYRTCFNEEAAHEKDLKETEERRKAD  
900 GFLKVRKIVITPTRVLVFPPEMMMGNKFLREYDPDGLYSLRVAFRDSDGLKMNNNSNVGSQ  
901 LVEKTIRESFKGMVAGKEFWIGSSNSQMRDHGCYFLLNQTRDMRKILMEKTGEFDEKD  
902 PIKAQARFQGRFTQARAVPFDLSRDDYDFDIDIKGGEDENGERYTFSDGVGSI SVHFARR  
903 IAEALKLQNFVPSVYQIRFRGIKGIIVTLDPNLDYRDHAKKYGIQERRKHHRFDLQIAFR  
904 KSQDKFNARVDVEIDIVKFSTPTPMQLNRPMINIMDQVTAMQSEASHRRMCARVHQLLDQ  
905 QLSDLGKCLVDEHKAREKLFDIRRVDVHLLTLEKGFHLTEEPFFRSLIQCHVHTTLNRL  
906 RAKNQVQIPFNKGRMMFGVIDESGGLQYQOIFCQVTNNLQKTPGVTAAKTILTPVLM  
907 KNPQNVAGDMRMFNAVDIPELRHLVDVVVFPYRGPVPHPDQAGSDLDGDEYAVIWDPEL  
908 FFDRNEEPIEFKPKKPPVPPADADSTDLVINHIVNYIQQDSIGVISYAFVNSDLYGIDS  
909 EVCKRIARKHSMVDFPKTGVPVQKLTREPDEDNNVPPEKPDYRPFMEKSGRDPDYVSA  
910 GLNGQIYRRSKEIQGILQFTVGHQESRAPEPDPDFLVEGWKTYELDAREAMDAYNASIRA  
911 LLDNYGVKDEAELFTGNI SNARNRLSDKDNDDMSLFNTNYAIEQRVSTIFQTHREQFFDK  
912 CGGYMELTVSDMTFIPTAPKINSRDLERRLCTEISPEMKKRASAYYQVCYTLQPKRESRR  
913 ILSFPWAIYDVLAEIKKENYARKIRNQELRIDIGRPIMSRLDDYIKEYLKHPRFAAFKA  
914 LVFDKVCCHRYATVYPALTELEFFVLWQFGFEQKIFDGCILPENLFYLFLLFAVSTENPFLE  
915 KIPADANVKAMEKRDHARIGGMGGPLMDFLEYLCTREFQSOLFVVSFNEIGVDDCLOGAT  
916 LASLSRAAIHTYYRITFSGMFFALPQLGADHSKNPSTKEQKFDTSQVVRVYEIDPFVIEVP  
917 SFAKEEGKLDLDELQMLKLRTGMQHLVVRIFIVRKTGNLRLLVSGIGSLEAIEALRDVVS  
918 IKPNLRSQSATVVAKAHLMADMVYAKIMGSDNFGGGPFGYCHDISDIKKATPRKKPIRKD  
919 LRN

920

921 >EGO-1 #2 - L596\_g10626.t1

922 MSADSDSSANAKTSGVIRIFLDRTYERYDRCTELQHYVLEKLTREETFQFTTLKRNGLP  
923 HHKGDYEERLSEYELTRMPPPKNADKSKEPWDREEYPPRKRLQLVTEFTEALSATMKGP  
924 LPAIMQISDDFFLKKDYDPIDENLRVAEFALGNLVDPFTHYSELKSSTDDKAQHDTHIL  
925 RSFMKDNNIKSGMIATFEHDKNILWIRCVHWQKNPQAVYGVSLKVPYNQIRRLIIDVDKK  
926 ADCATIYFCLNYPVEIRRAKMKSQKGRNMSAFGTEFDRKGRDGERCLSWEGEDSENGRLK  
927 QAIADSPVLALTLTDYKDEGFYNVLSRLRSRCKVPEFTHVHKEKRSYVDPPDVLHLRT  
928 KSGKLNDFSVAYFVQAVFSRGALVKDALLRSEDVNRNFKIAKICKQCDKNRIVAVCALERF  
929 LNAIDEREKRELDPKILWDFLVNQVSGDIGTIQKQLDKNEKDGTYTLVRKAVVTPSRILLT  
930 PELIMGNRGLRDFVNNSDDVIRVLFREDEDGTQMRKISVGEIIIQKVVGQVLEDGIRIAGR  
931 HLCYLGSNSQLRDNGCYFFEKSQIPDIRKKMGTFKEMSVPKRMSRMGQFFTQAQRVQRP  
932 LERKEYRESYDLIGGADLVNEPYTFSDGVGVMSVALGEEFSRSLKLNCGVPSFCFQIRYRG  
933 FKGVLVSNPMLDEIRAWAEANLSDEDI PKYRNNVFRSSQKKFDASKNAKLD SAPFEVVK  
934 YSAPCQISLNRPMIDILDQVSEIQSYKAHERIWSRIDELFEKQVAKAASSLTSEHYARER  
935 LAELPKRIGTSDLKEEDGFMLTQEPFFRSLIMSSVRLSMSKLRKKNVDIPSNLGRVYG  
936 IVDETQQLQYNQIFCQVSSSIFVKHPKKSALKRILKGPVMMTKNPAIVKGDIRRFEAVDI

937 PELRHLVDVVVFPYRGPRSMPEMAGSDDLGDGEYVI IWDPKFLFDKNEAMNYPRPLKTF  
938 EKVREDEIEKKSCFEFFIKYIIQDAVGMLAHAFLANSDYEGIESEVCENVARKHAKALDFP  
939 KTGDQPDALTKMPTKSEIYEGKQIPQEKPDYRYPDFMEKDHQRCYASIGLNHGIYRRARAL  
940 DDILHRSVDRHLSDKIEVDPDLIVDGDWEDYEDEAKKTMNDYNSQIRSVLETYGIEDEGQL  
941 FSGAISKMRSGVGDATQDKDLFGAFNVLSTVSKHVALIFDEFRRSFFDEHGFGGYLHCTD  
942 LKYETVGRSDEMHSYKRTCRKPTLEMKKLASAYYKLTYEAAARQESQQAVKLLSFPWTVW  
943 DVLAAIKHDVAEEKRRSSDRRDQYMNRRVKPFANLLSEHIAKFCRQRQEDLDDFKNLLVN  
944 TDGIIALMLERYEGLVSI LFFVCVWADDSNVFSDFFNQHLWCWILILFGQGIYPWNHAKT  
945 FHTDLPIFYPIDKLKEVQNIKESVNLNHLGGIGSVILLFLEFLSSYYFGHKMKSISFN  
946 PLGLNSSLGCYLQKLFHAATKTYNEVIFSVSFDTLPOPEEGKVHRSLSREFEIEPFMIEL  
947 PLQKESEGSEARYNLS DVEDQIKEMTGASHVRVRPLNDVFLSGVTRLMVSAKGTLESSQK  
948 LRTLLSVMPSCRNEHNAKWGKLFMSERLMLRLNLVHS

949  
950 >EGO-1 #3 - L596\_g1037.t1  
951 MHEILFLLAEGFVEGPGVALEGKDLTVFFSKSFALNFSWIKSPPVTINRLTLCVHQIDSM  
952 LNDETKALARLSELTRRIDFNHLTSEKGFQFIDEPPFKSLIQCCVKFTLSKPMGRFKW

953  
954 >ERI-1 #1 - L596\_g16241.t2  
955 MRDRLKRRLRKDLLSTREYEDEF SRNKLRQHFDLVIIDFECTCEDEVVDYPFEIIEFPA  
956 VLVDTHQKKIVSRFRTFVRPKVNPVLSAFCVELTGV TQADVDKAPRFSEAVLKFHRWLF  
957 HVYPSGQHDFGGLMKS YAIIVTDGPWDLGKFFQLECI RLECI RSEYNAKI PHHFRAYINI  
958 RRVFTLKYKKT HALSKVNLAGMLAVLGMEFEGREHCGLDDAMNLARIAIRMMEDGAEFRI  
959 NEKLVAEYADKYTSFVPTISTTGMSTAERDRRKWRLNLPYRIVNICKDRFMTGAYADCD  
960 SCDEDANFYEKAANRK

961  
962 >ERI-1 #2 - L596\_g986.t1  
963 PISAHNFRGTSQQMRDRLKRRLRKDLLSTREYEDEF SRNKLRQHFDLVIIDFECTCEDE  
964 VVDYPFEIIEFPAVLVDTHQKKIVSRFRTFVRPKVNPVLSAFCVELTGV TQADVDKAPRF  
965 SEAVLKFHRWLF SHVYPSGQHDFGGLMKS YAIIVTDGPWD

966  
967 >ERI-1 #3 - L596\_g8761.t1  
968 MSLEELSALISEASKRKP KRAKRGEE EAPNGRYEDPKEFP AVLVDTHQKKIVSRFRTFVR  
969 PKVNPVLSAFYVELTGV TQADVDKAPRFSEAVLKFHRWLF SHVYPSGQHDFGGLMKS YAI  
970 DDDGLWELRNFLQXXXXS ILTGLSVKKNRNSAFIVQVRTTYPMHTASTDGLAKMSWGSDEG  
971 SISMAIAALRKS RPAAFELEYPDLMAKT KPTPLPRQPSPAQQVEPKSPAQSIAPTSSSED  
972 LHAHLAKIQVTQPSVYLP SRPAYPSVAPS VPTPEAVVPQPEPPRGPPGFDRSAKPKETTF  
973 DTRVMGGASQTDVQVVP SREVPHPVPSLPVAPARPRVDRSTKEAVARKEAEFQRNLFAYYE  
974 ACTQDFRNMT

975  
976 >ERI-1 #4 - L596\_g16232.t1  
977 MLAVLGMEFEGREHCGLDDAMNLARIAIRMMEDGAEFRINEKLVAEYADKYASFVPTIS  
978 TTGMSTAERDRRKWRLNLPYXXXXVYCGNAI INGR LIRITFKFSRIAWSQHLACEGVTKI  
979 EMLAAYVAFEARRRLAQFV TYRES

980  
981 >ERI-1 #5 - L596\_g16263.t1  
982 MSVSVTRIQELPSVLRPFVPRQSLPSFSRDGRTPETELRSGKTRGRLLRVRGRRRGRRRG  
983 FRRRRVRLQPLRRRSDDL RGTGLGAYLRSLETDAE ESEKRGRC SKWPLMIEDPNEPLRC  
984 EGYQVPKHDFEFPREVSVXXXXKANLQKELEELQLNTGGTSQQMRDRLKRRLRKDLLPKY  
985 KDEFSRNKLRQHFDLVIIDFECTCEDEVVSRFRTFVRPRVNPVLSAFCVELTGVNKAPR  
986 FSEAVRDEFSPGRESDEGQGRVSDQREARGRVRGQIHRVCPRNFDHRHERGAGSQMMW  
987 RLNLPYRIVNICKHRFMSEAYADCDLYDEDANFYEKAANRK

988  
989  
990 >FKH-5 - L596\_g10448.t1  
991 MTPRGLCVCNLSSQPQHSMEPSSSESRKFMDMISTLCAEVDNKQKLPEKKPQRNASGKCM  
992 KPAYAFSAIIALALKNSPDGRLPVWKIYAFI LEHFRYFRTANEAWRNSVRHSLSKNGNFE  
993 KCLKEDGSKMKDGNMWQIIIESRREAI DREILKYRLSDKYHAMNLAALNKPEILTSLEEGS  
994 FGLPPFVFEKEYKQAYRILANQKNKRPEIPKNFEVASNVFKESNMNTLNTDLDTLARP  
995 ISVLLNENTPSPISRIDLKPSIPSSSSQNMSEASMNAEEKQIYEKYLTSDSNPLLSSAA  
996 LPGAVVPEIDDCMLWECEQDTLEAGIQTRLRHDENDFWLPTRSNCIFDLPSDNLSVVSDG  
997 F  
998  
999 >PASH-1 #1 - L596\_g24740.t1  
1000 MRKHKKLKPRILLAKTWCSPSPFGDLXXXXSCRKEKSLTTPTDHLIEDSDSDGGIRNRSF  
1001 GETQDQPQTTQTDHLDGSRSGDEFEDETLEKTPNKSHTSKNEKEEQGTSKRVLAYSEYGL  
1002 SNKLPEGWVEVSHESGVQVYLHRMTRVCTFSRPYLLGEGSVRHHKVPQTAIPCFQQRKVR  
1003 EQLEQREKEIEEVVKSQKGAETSAHLIAKLQAPDVKTIAQSQQLTPDDLFDYAKSVFEFKT  
1004 ITVYRDKASKWRHLKEQKRAEGKINAAKAALLDSAPEIPQNMKIITIALDVESEKKAVT  
1005 IDPRAKTSINILSEYFQKVFRSTPRFTDELTSVPLKEKIMSFQNLAKSELNPEIGDEVIL  
1006 GEGVGAKKKTAKLRAAAEEAASFLIPEIKFDLDGKVISWNEDSGNKTEKDI TVDFNQYEIT  
1007 DPRIAE LCKSYAQPSPYTVLQECLRRI SACSND EIQIKTKHKNYSSFIEFTMAVGEQKVS  
1008 VTCSNQOEGTQRASQLMLALLYPDLQNWGDVLRLYGEEPQRVVKDRSKEVTTLQTFVQNG  
1009 GDKVLS DHNNAILD KLKEEMKATADGLDLQKGLLKEVSASHLP ISECDAVLSAVYAEFHR  
1010 VKREVP EMGI  
1011  
1012 >PASH-1 #2 - L596\_g24745.t1  
1013 MGDVSDDLKLLMLERERILRELNSQNPGYDPDDVEPPPPPPPELPDEESSLSSAEDMYPP  
1014 PPPPFTESFPSPSCSPAAPVCLTASPANPEPCTSFDSVSRDPSSLQRDSSSTALPATPLQ  
1015 APIKKDAEESFDSPVAKRPRMDGCPFSGTQFSEESPAVNRKSTYNDNVDADVSNEA  
1016 NNSQAQSVENSGDSDLSDSDDDFVDGLLEKTLDESRTVKNEEDLEIKSKRVLEHRGCDH  
1017 FVDLPEGWVEVSHESGLSVYLHRKLRVCTFSRPYFLGTG SVRHHKVPQTAIPCFQQRKVR  
1018 EQVEQREKEIDELIKSHKETESSAHLIAKLQAPEVKT VQDFEQS QLTPDDLH DYAKTVFK  
1019 FKTINVHRDRTWASHRMRIKDKKRADAEMNAEANAASLDCDRPVLPSDVKLITIPSLDQN  
1020 GKPQRKNFLMNPQGKTSVSVLHEYVQKVVKSTIRYHYEETRSSNPYIAIAYLKLQGISG  
1021 KATSAVSIKEKIMLLHEQQRREGLKNSSENTDEVFLGKGSVSKKLAKLRAAVEAVSIL I  
1022 PGIEFDSEGMVVNSKKETGTENNANEDVISMFNKFDITHERIPELCSRSGQPAPFLVLQE  
1023 CLKRYASADTKLSISSTRQKHHRHEFVMSVGKHETKVIC TNKQEGKQRASQMLQLLHP  
1024 ELKTWGEIIRMYGYEAQRQFKDARKKGN DVTKLQALAADGSSKVS LNPNAAIL SRLNEEM  
1025 RKTAERVGQLKGPFRPDLSDNETAVTDWEVALSAQYSEIHRDRVEVPIIDL  
1026  
1027 >RRF-1 - L596\_g7841.t1  
1028 MDDMSMFNTNFVIEERFSKIFQKYRLEFFEEFGGFEACTVDESSLVNRSKNLHANKAESD  
1029 MDRRICKNPTEAMKDKACAWYNVCYFYANKAKRRYLSFAWIVVDVLAEVKRENHFKNRE  
1030 QRLMGIP I HTRLHAYIEKYTG DVSNRVALEELKKLIAKEERHIAKYVEAHEGEIWIVNCS  
1031  
1032 >RRF-3 - L596\_g11915.t1  
1033 MSSKAVSTRGVAFALRLSVSQEGLPKEILLHAARQMLQSCGCSSVRLETPVQALQAEYED  
1034 CRLEISGTVTFAVPSSVDAWQMIIVFTSKFCAETGMGLELQPSLEMDAFDRPNHDNCHIL  
1035 WFAFGNMPNEGLFLTRGDYISGYNKKSNRFVPDRGYNVNYVAGTQLLLSWANFEHDKLL  
1036 TIYFAVQLPCPASDGLLFKGYKLVFTYHNIISVIADTDDSRAGNNVVYLKLRHPPQLWEA  
1037 IPRLYANRRLVNLEACRDWIRVFEFPGSNRFYGCTKSTLGSSSVFAFGMPKNVVDPKILF  
1038 EEERE EWKSFAEDLTTREN PTRSLYDILSRLKRRKANIRLYFGSILSVVRSVMRTC DLPST

1039 DSFRVNYCLEALASRGFSVMDQWFPI DNQEANYFPVFFSRVWVWCLGECKEAVENTLENML  
1040 SIFDERKHHVNMVTVFEYLYEQNIKSLVEERDMDDCSYNDLPTNCVMVRKIMVMPSTRLL  
1041 MPPEVMMTNRVIRQFGEENALRCVFRDDGGNKLVPKEFTRGRSVEGQSVTIKEIVKGTLS  
1042 SGIVISDRHYRFLAWSNSQMRDHGCMYADIITQDETTGEEIVQDITTIKRWMGDFSSSR  
1043 NVPKLSMRMGQCFTQAQPTIRLGP SHWCVEKDFFTGPFNGPTKYCFSDGVGRISLRYAER  
1044 ISNLMGLTFSPSCFQVRYRGFKGVLCDVDPQLDRSDTPIVFRESQMKFIDYERGSQGPVL  
1045 EVVKYSMPSPVCLNRPLIMILDQVAEKNGSHCHRRVCSAIIHQTLLENELNELAVMLYDESA  
1046 AIRALSQRVNLSIDFGQFVNTGFRLTEEPFLRSLLLAIHKYNIRQQLSKVKIPLPNGMGR  
1047 TMYGVLDEYGVLYGQVFIQYSQSINRAGQRKILHEGPVMVTKNPCHVAGDVRMFEAVYQ  
1048 PCLEHLVDVIVFPRYGRPHPDDEMAGSDDLGDDEYTVIFDIDLFFGSNEPAMEFPKSEAPE  
1049 FDMPEPTDDMVDFFLKYLEQDSIGRMSNAHLMMSDKLGLFHEICNNIARKCSVAVDFPKS  
1050 GQPAEPLQMDQCADC PDYMKSN TKPSYRSKRLIGQLYRKAKNIEDIIDLMPNPGTDRNI  
1051 PFDEDLNAEAYLEKNPDVLR ECI RVRNAYNCKMQQLLDEYAI SDEASLITGHIISMKRLT  
1052 EMEKDDYTFYHTDRIVELRYGKIFAVFRKMFFDEFGGEEGHFEIHTSGLREFKMN DILIR  
1053 KACCWYTATYGYGVHKGGRIFLSFPWILWDVLT SIKKQKTLQASRICSVKSPLADELSK  
1054 IALFKCQNEEKAFVEFCNDIQKAVPIVKTYRENYGDHFLKACYVLNYWLLKERFYERTGM  
1055 TSQQLV IIFLQFGIAIRHGTLNNTGRIPRIFPKMITQSKDIIDIDSEGPLLPEIGLQII  
1056 EFLRYVSGYDFMFSECIDLSLGNILESTR LITRNTIWKSFSLASFVKVFHHVTL SYFRAL  
1057 HCGSTDVGNPEARQVAWDYGEIDNPLIVHKEALLVNTPGMPPVHLESTLNILQAWSGVDD  
1058 LMVRPMNHRDLFIVTCAGGAESRQMLRRLQLPPTVLR EALLTDSIPSEIVTGTEM

1059  
1060 >RSD-3 - L596\_g5786.t2  
1061 MSCVIDSGMDFTFIPSTFAGRRSVGAGAMSDLFSGIANLTKSVTDTFNTYEIRKLGDKVQ  
1062 GYVMNYTEAENKVRDATNEDPWGPTG PQMQEIAHMTFQYDAFPEIMNMLWKRMLQENRAA  
1063 WRRVYKSLILLNYLLKNGSERVVG NARDHVYEMRSLESYKNHDERGKDQGVNIRHRVKLI  
1064 IELIQDEDLLREERKKAKSEGKEYQGY SKEEMRMGKGGSYSSSSMGNIDDWNGRSYKSD  
1065 NFSGGYRDEPSREVNSFNFPDDERNRSE SPELGIRETKPVEDEDEFGEFTEARSTSNSIP  
1066 SKSDGVI PPAIQGPGVAVHSP IKPPQGGVHLSLDNDPFGDFTSAPIPKTQPEVDLFGDFS  
1067 TPAIDAI PNLPRPPTPGYSAPSNSNQPSSTLV DLFDAVPSNPTPNAAAPQVDFADFSN  
1068 PAPQAPTSSVAANDFFASIPQMTNVT PNQSFVANFDSSVQTQAVSSNLDFADVSLSSP  
1069 SHPSTNAVPPMASPMLFQSQSMTPSPA ASSSHTPRSVASANPSKASSSMWDDMKGRVNID  
1070 LDNLSLRNSGNMKQSLSMNQMQKNKNQG PLEF

1071  
1072 >TSN-1 - L596\_g28061.t1  
1073 MTDSAPQQT PAPAGAVKRGTVKQVLSGDALILQGP AVNGPPKEITVYLSNINVPRLAKRP  
1074 AEGQPVSSDEPF AWEAREFLRQKVVGKT VSFVRDFTATSGREHGRIYLGGT SIENAENVN  
1075 ETGVAEGFFEVRTGKQIDEYAQKLLDLQEQAKS AKKGRWAFDEQQLKEKVRNVKWNIDDL  
1076 RNLVDTYKHKPVKAVIEQIRDGSTVRAFL LPEFHVTVMLSGVKAPAVRLGSEGRAEEYS  
1077 EEAKFFVESRLLQREVEIILEGVSNNNFV GSVIHPKGNIAVLLLENGLAKCVDWSIGLAT  
1078 GGAPALRAAEK LAKDKLRLWKHF KSVSSGDKKS FVAKVTEIGMGDSFFVQKDNGDEIKI  
1079 FLASIRPPRNEAGQEKQSVGRQFRPLYDI PYMFEAREFLRKRLIGKKVNVCDYVQPKSE  
1080 QFPEKTCCTVTVGGQNVAEGLVSHGLAKVVRHRGD DENRSSHYDALLAAEAKAETGKKGM  
1081 FAEGDPNEKGGVIRVQELTGDANRSKQFMPYLQRSTRPEGVVEFVSSGSR CRVYVPKETC  
1082 IITFLLGGITCPR TARPGPGKLI GESEPYAEEAMKFTRSKCLQHEVQIEVETMDKAGGF  
1083 VGYMFVPNDKGGHNNLSELLVENGLASVHFTAERSHYYNQLNAAEERARRARLGIWKDFK  
1084 EEKQIDALEQENAENVERKLN YKQVAVTEVAKDLLRFACQSYEEGPKIVQLMRDLQQEMN  
1085 ANAIAGSYTPRRNELAAAKFSQDKQWHRVRVEGAKAGMVDVYYIDFGNRETL PVDQMAAL  
1086 PSKFVTQAPGAQEYQLALVGV PNDPHYAAETIAAFENLVFSNSNILLNVEYKAGNTEYAT  
1087 LSIDADGTKSDIGKTLVMEGNALAEQRREKRLQTLVSEYTEAEQKARRARKNIWEYGDFT  
1088 GSEV

1089

1090 >UNC-130 - L596\_g11813.t1  
1091 MRFMSDILCPPSATPDNKLVAASRKRLLTQSLTPSPPPVESKMAKLDSESSSSTSSSED  
1092 RQPPAVTQIVVAAIDKGELAAA AVLRS DGDSSGGEELATEAKQNALAAA AVVGQHARGGG  
1093 EDTTTS PGTSRSPVTSDEGDSGDECNESSNGDKRIGMSSTRSRSGATKPAYSYIALIAMA  
1094 IYNSPEKKLTLTSLQICDYICNRFQYYRDKFPAWQNSIRHNLSLND CFTKI PREPGNPGKGN  
1095 YWSLDPNAEDMFDNGSFLRRRKRFRKQSSNND FASLPFAPPGAHFLPPQAAFLANPAFVL  
1096 RSPMMPRVGPLGLPPQLYRTPYSPGFLLPVVTSTNGLPHGLPLSLSSLP PGMDHQRLLA  
1097 AMAAQSAALSSASSPPNTVSPSPSPAQAHAH  
1098

1099 >XRN-1 - L596\_g18210.t1  
1100 MGVPKFFRFISERYAALMERVQENQIPEFDNLYLDMNGIIHNC SHPNDDDV SFRISEEEI  
1101 FGNIFQYLDQLFSIIGPKKVFVMAVDGVAPRAKMNQQRARRFMSARNAEHQQKQALAAGK  
1102 PLPTSDRFDSNCITPGTSMIELQKQLEFFIQMKQSTDAKWRDVRVYLSGHNVPGEGEHK  
1103 IMDFIRTERSKPDYDPNTRHCCYGLDADLIILGLCSHEPHFALLREEVTFNRAGQKKDKV  
1104 GIEGTKFFLLHLSLMREYLAMEFQDLKETTTYRKSNTDSL PFALNEENVIDDWVLMTFLI  
1105 GNDFLPHLPNVHIHEDALPRLYKAYKAVLPSLGGYINERGI LNLKRLETFFERFSVIDRD  
1106 NYLDQFEDADWMRNKKQREQGEGPPDVI PQVVFEGLL EEEEDVIESSSTCVSSSDIGAFDT  
1107 DSEDERKEVEKITGVK KKKNGGDVIPSASEAL AAGGWDSESSLEIDGLNLEDSDESPDEN  
1108 WNIVIHR SFKKKRRDYA EKLN YVNI SAEELDDQARGYVRALQWNLHYYYHGCM SWSWYY  
1109 PHHYAPYLT DVRNFGDMKIEFDLGE PFN PYEQLLAVLPAASCRCVPPALRPLMTESSPI  
1110 SAFYPTDFKTDLNGKRNDWEAVVLVPFIDENLLLRTAKAAYPSL TEAERRANTHTGDLLY  
1111 TYSTKDLGELNSSCAK FDRVAENH SKCENMEKNAFRLPRSKI V TGLLPQTKLDVYFPGFP  
1112 TTKHLN Y TGSLEIAPVKVFHMPTRKPVMI LKIGDN TENKYSASGV D PRSLLGQEVQVNW P  
1113 LLKLAKVCSV VTPDGRYLMENH QTSFTDFGPNKHKVFKDIKDMVTDREFGRYGICVSNVK  
1114 AIVEVNLFTGSRMKFKGN N VIVEKSWSD D VFAVSDGLVLQNV E VKN DMEQKFKSAADAF P  
1115 VGSKVFLNSFKV SAYGMMGTVARNDVAARGTCLVEGVAPLQVNVKAAVSKKQYK KFWFSV  
1116 FDLAKIIGQDKHV VNRVTGTVIVQMDSDFKDEEQEERGKHHHKKHGHERPRNNINVGINLK  
1117 YTKRNEAIVDFSKREN ETWYYSLFTLKVVDY AQRFPEVFRALRQNKDQY LLED FWP ELS  
1118 PEERTNKAKEVVEFLKALPCSSRRPETCNYKYADPEELLLIQKEIAATVAETNVQQFTVH  
1119 ARALFRPDFVTGDSPPVPNVEFKILDRVIVAKTHRYVSPGAAGTVIGIKSQIGKETELDV  
1120 MFDVPIVGGSNERTGPNGLKYTRVFSHQLLNITHAARLRGGDQSESPSDNQ PQSSRQRF G  
1121 NNRTDQR PQQHHPGHYK GADSRMDNPKPSHHRAGNSRPENQRSGPPKI QVLRPKQ GDR  
1122 QHASDPPG SVGQRLFQNSQNNRRGQNNRHQQNRQCQPKPERNEKAKSVEDQANKGVED  
1123  
1124

1125 >XRN-2 - L596\_g10155.t1  
1126 MGVPAFFRWLSRKYP SIIVNATEER PTEVNGVNV PVNSTKPNPNYQEFDNLYLDMNGIIH  
1127 PCTHPEDRPAPKTEDEM FALIFEYIDRMFAIVRPRRLLYMAIDGVAPRAKMNQQR SRRFR  
1128 SSKEAAEKEEQIRLV RERLEAEGVVPPEKSPEDK FDSNCITPGT PFMARLADALRYYIN  
1129 MRITNDAAWAKIEVILSDANVPGEGEHKIMDYIRHQRAQPNHDPNTVHCLCGADADLIML  
1130 GLATHEANFNIIREEFVNPQPRPCELGQYGHELDECQGLAREEPGPDQCEPMSKSTNFI  
1131 FIRLPVLR EYLEKELEMPNL PPFDLERVIDDWFMCFFVGNDFLPHLPSLEIREGAIDR  
1132 LIKLYKDT CFTTGGFLTENGTVAIERAQQI LNLGLDVEDQIFQERQRKEVQFKERNKAKR  
1133 RRERQQAPAYFPKVGLLAPMSTPQTFSGERTREMARDARAEAMDF TNQQQRMQS IMQPVG  
1134 TGNQPQIGQKRKAVDPAESSEEEVHDEVRLYEQGW RERYYASKFDVSPSDMDFRRKVAE  
1135 AYMEGLCWVLRYYYYQGCASWDWFYPYHYAPFASDFDRIYDFKPDFSKPTAPFKPLEQLMC  
1136 VFPAASRKHIPETWHHLMTEIDSPIIDFYPNDFQIDLNGKKFAWQGVALLPFVDEDRLLG  
1137 TLSEVQDKLSEEEKHRNSLGP NRIFIGTQHPAYQLFEEIYNHEGGADVHIDSALAYGMGG  
1138 SIAKDSLVMMPGTPYGS AVSHETCHDIESNACISAIYADPAYPEGFVFPVRLPGCKEVE  
1139 KTLKPGDWNQHRNGNYRPQIGFDRHAPRASLDQGAHRGFRNEVRDRSFNDRRQSDRFDR  
1140 RNDRHPYRGGSPQQHNRGPRHSYPPPGGGHGGHGGGYQHGYPQRGHPHDHWNGGRGGRG



1141 GRGGRH  
1142  
1143 >VIG-1 - L596\_g22586.t1  
1144 MEYGINVNNKYGYLSDEEAEDPEVFIKKAIQRKDQKMAEKKMAEEKAAAEEKAAEAATEQ  
1145 KRAANKENRRETTERTGTRGARGPRGPRGEGFRGLRRDGPKEGEGTGPRGPRAPRGEGRG  
1146 GQNRPRRERPVKEGETEAAPVAGGDEARLNEEGDNRRGGARGGRVFRGGPRVPGTRLDR  
1147 KSGSDQGTGVSIEKKDGHGKGNWGTQEDELAAAEDVNVSSGGEVEREKTEEDLKRKAELE  
1148 KAARELTLSEFKARMAQKADKPEFNIRQAGEGVDKQPKLVPLQRENDEDHVAEEVVVV  
1149 RREPKNKRLNIDINFGDENRQRGGGRGGARGGARGAGRPTKERRGKDTHTDFTAESFPAL  
1150 GAR

1151  
1152  
1153

1154 Argonaute proteins

1155  
1156 >ALG-1 #1 - L596\_g7718.t1  
1157 MTTMTGGPQQQQLDQTQQQVISMLDQLSFSEGGMPPNYGMLGGPLMGPGPLAPGPQQMP  
1158 FGPGPPGPQMPQDIYFQQFAPPMPGQMMMGGGGGFDRPGSLAPGAPIDPSQTMMPSSAM  
1159 TPSLVSTQGGAPGTPSQLAPAI PASTIFQCPRRPNHGVEGRAIVLRANHFVSRMPGGTI  
1160 QHYHVEVQPDKCPRRVNREIISTMIRS YTRIFDNIRPVYD GKRNM YTRHPLPVGRDRVDL  
1161 EVTLPGDS AVERKFVVGIRWVTTVNLTTLEEAMEGRVVRQVPFESVQAMDVILRHLPSLKY  
1162 TPVGRSFFSSPTAGGAAPAQGHFQQESKLGGGREVWFGFHQSVRPSQWKMMLNIDVSATA  
1163 FYRSMPIEFIAEVLLELPVQALAEKRALS DAQRVKFTKEIRGLKIEITHCGQMRK YRVC  
1164 NVTRRPAQTQTFPLMLESGQTI ECTVAKYFYDKYKIQLKYPHLPCLOVQGEQKHTYLPPE  
1165 VCNIVPGQRCIKKLTDTQTSTMIKATARSAPEREREISNLVRHAEFNADPYAHEFGIAIN  
1166 TAMTEVKGRVLNAPKLVYGGRTQTALPNQGVWDMRGKQFHTGIEVRIWAIACFAQQQHV  
1167 KENDLRTFTSQLQRI SADAGMPIIGQPCFCKYAVGVDQVEPMFKY LKQTFAGIQLVCVVL  
1168 PGKTPVYAEVKRVGDTV LGLATQCVQAKNVIKTTPTQLSNLCLKMNVKLG VNSILMPQV  
1169 RPRI FNEPVI FLGCDITHPPAGDSRKPSIAAVVGSMDAHP SRYAATVRVQQHRQEI IQEL  
1170 TYMVRELLVQFYRNTRFKPTRIIVYRDGVSEGGFYNVLQNELRSMREACMMLERGYQPGI  
1171 TFI AVQKRHHTRLFAVDKKDQVGKANNIPPGTTVDVGITHPTEFD FYLC SHAGIQGTSRP  
1172 SHYHVLWDDNNLSADELQQLTYQMCHTYVRC TRSVSIPAPAYY AHLVAFRARYHLVDREH  
1173 DSGEGSQPSGTS EDTTLSNMARAVQVHPDANQVMYFA

1174  
1175 >ALG-1 #2 - L596\_g21728.t1  
1176 MQQPDEKKPMKPIPLRAMEGSESVQVGR LNVQVNGYTLRIAADTQRTVVHQHEITLFGVF  
1177 SRDEGQKDVNLLNMGGLKDYKKQGRLLI IYAVFDKIVEANPLIFPKNIYQC VYDGGNIL  
1178 FCKQQLVDYKLPME SVMES SKFCGSVRDFLGARCEKIKFKITYTG VVPLDTKELNGNSRS  
1179 LVQFLDIVTSQQICRSEQLVFKNRRYDSDSVRDVQASMAKIIKAGSEKTSIVGENSSH  
1180 QEALLLIEPKRSPFFMGGNLKDI FDI VQREMGVGNPRLVSELTKLVKGLGVFTLHAKKLR  
1181 QFQIKDLTKEPAGRQIIT IERSGQATDLTVAQYFQDMYQMAVNP NLPCIACEAIRGQKQ  
1182 VLLYPSEVLSVMPGQRVQTQKQTPKLVEELIRQAQFVPADLMQEVQKERLLFGLENSKYL  
1183 AEFGIKLDGKPREAPAKVLPTPAICYGRD TTVQPDQEGRWMIRENQYFKPATQCKWALCV  
1184 VENAMDSQVATR FKDSLVR AAAGHGLMIGEPSLHRFQKADPEDLTREFAYLKANKVQFVM  
1185 GIFGGDRNCIERNLLKEMEIRFQLITQTITQSKTAFKGT TNKMVIDN ILMKTNLKLGGLNH  
1186 QVTTSRAYATRFLDAIFPKNRIFIGLDMQSPGSPMLGGINEFTTDPTIVGMCVSVKNAAQ  
1187 MRGHYWCQPATFKFIMGIEKALGSVLKMYQAQRENVNDDDFPTDIVVYRGGVSDGDI PMI  
1188 VDEEIPQMKA AFANLKIRGRSYCPHLTVLLAQRASERLMPVSSPMDGGGGYNNPKSNGNV  
1189 APGTCVSSGIVSPTRSEFILAAHKAIKGTAKPMRYIVLDEYGSQSKRFTIQELENMTNQL  
1190 CYTHGIVTSPVSRPGPLYGATDLVKRGRADWKAREYRSRNAAPVGPVDDQFLEGYNKQRL  
1191 AWQLEYD GKFWA

1192  
1193 >ALG-2 - L596\_g16709.t1  
1194 MNVFLSTAATQTLTIPIIDRATDRTGGVSHSPAILRRI FWDVVDNNSLFPAPFGIVFNDKD  
1195 QLWSKRKFNQFEFEAQFGSNNDHTIKLKLVD MFDFQISPTSDQIQAEFLNSLLTQTDRCK  
1196 LLSVLCLDCPTAISVCTCAVFLKMRIPIIDYFLSVVSRRPRLTDADYRGLNFHWNPDQI  
1197 TALRESLKGLTMVTTYGGTSYYHYKFLDVYRGNASETMFNWRRPENNEEEEITIQEYYFK  
1198 KWGIRLRLPHFPLIQAAPLQKNIYLP MELLMISDRPQRFQKPIPEDCMRAALEKATISPR  
1199 DRFDLICDMIQQSSINDDNRFMQKFGVYVDTTLMITEARVLLLPIILTVRDGHTVIRPDTT  
1200 ATWRSREVQSNSRRRAIIAVIINSEVRSSMGN SFFPYFNALMRACRSIGINLVDQQDSFQ  
1201 PVIHTYNRDQQEIDVAVXXXXILSFSGFTIPNSVKFFVQRDRLFFIPTEGSRPGADDLGR  
1202 GLQMWYALHSLVSVGEKAEAI VNYDRTCVFLKMRIPIIDYFLSVVSRRPRLTDADYRGL  
1203 ENFHWSPDQIAALRESLKGLTMVTTYGGTSYYLYKFLDVYRDNASETMFNWRRPEDNEEE  
1204 EITIQEYYFKKWHPTPTALSSDSSRSPAEEHLFADGASDDIRPSAVPGIKQ  
1205  
1206 >ALG-3 (T22B3.2) - L596\_g3457.t1  
1207 MIDNIDERVSTPIQVIDIIFPSTSSLT CPLISGATSTESDSASSSSRLSTDDSGSFVSD  
1208 SEEHLTRPSLSPAPSCPQLPKLGAGSRAPSE GSGRFMDGESSESEDEDEAEAQRRVIAQ  
1209 KEAGCGLLSEDQSKMQIRALMARPGFGTNGR KIPVLANFFEIGIRNKDMIVMQYHVDIT  
1210 HPGNRKLRDENRTVFWKAVEQNPQVFQNRFA IAFDGAHQLYAVQKLRLPHGGSSAEIPI  
1211 DIALARDLRSSSKCAINLQLVGP MIVDIGKSKSMNIDERVSTPIQVIDIIFRQSLTCPLI  
1212 ANSSNFCAWKSSFYRLPTPNSNDALDLEGGK QMWTGFFSSAHVAQNYRPLLNDVSHSAF  
1213 YKQHIEMVDFMCEVINERASAFTCRATNPG PGGAYRGMKPGGPRGMGNINDNSPGFLSR  
1214 DKLYENFSLSSQELKVLDDAIRGVKIRVTHR PGVVRVYRVNGLQVSADQLTFVVGKDS DGA  
1215 ENRLTVAKYFELKYAKLKYPRLPCLHVG PPSRNIFFPMEVCRLDSPQKYAKKLSERQTSS  
1216 IIRAAAVDAEQREKRIVSLVQQAGFD TDPFLKEFGLKISPQMVETVGRVLRPPAIQYGEN  
1217 NRRMDPIVMPKDGAWSMDNQVLYLPAACRSY SLIALVNPREQPNIQNFCQALHQKAQNMG  
1218 LMLPQWPDLVKYGRTKECIVQLFKEIAFEYEQ TKQQCDLIIVVLQAKNSDLYMTVKECGD  
1219 MNYGIMSQCVL MKNVQRPSPATCSNIILKINAKLGGINSRVVPDAVTRKFLIDVPTLIVG  
1220 VDVTHPTQSEERQNI PSVAAIVGNVDCYPQTYGAHV KVKQRKCRESVVYLVDVAKERLLCF  
1221 YRNTRKKPARIIVYRDGVSEGQFGEVLR EELIGIRKACMELSSEYRPPITYIIVQKRHHA  
1222 RMFCKNPRDSVGKAKNIPPGTIIDTG VVSPEGFD FYLC SHFGIQGTSRPARYHVLWDDSK  
1223 FSADELQQITFSICHTYARCARSVSI PAPVYYADLVATRARCHIKRKLGVHETEHFDMDK  
1224 FSRKPSTTTTTTTPFDNEIVGARGDCRKG QMPDFTNLKQSTCEAALQDFVNVTEGFKTRM  
1225 YFI  
1226  
1227 >ALG-3 (T22B3.2) - L596\_g16708.t1  
1228 MTTIAGYGDQSVNLRAAIQTSLKEFYKGTG GLYP SHIIMYRLGCTSSQMTAAAKNELRAV  
1229 FSAVKEMAELANQGHFDPTITYLHIERKH QKRFHCGADVGNLPNGFAKANNGNVPAGTIV  
1230 DRDVT SQAFYDFYLC SHHGALGTSR PTRYIVFYDDWNL TADQIQ AATFCLCFLNSNCTKA  
1231 ISLPAPAYYASKGVERGKKYLNTCMLRREDI QPNEPLMMPKSI S NSMYII  
1232  
1233 >CSR-1 - L596\_g20174.t1  
1234 MIGEVTLADLHAE SFGAPLQY PDLPCVEWERQGP ARFFALET LIVMPDQRVAFERTDARQ  
1235 SAQLQKINTVRPEHRLKNIEDQMRR LHLWGDSQCPVLTGFGISIEQQLLSITAGVRTAPV  
1236 IQFGSSTDK LQPGRPK WEMALKKNRYRIPANV KSWALIYRCEDKDVDVVR LFTTKLRSTA  
1237 KMRGMNVEVPLAVIRFSPNRQAGEGDDEVLGRHV NEARSAGAEFIVYVSSKCIQDHDLLK  
1238 LLERRRLRVTQHISLESVRAVVIENKIT TLDNIIHKLNVKNGGFNYTPLIEHVGN SRELE  
1239 LASGNVLVIGLDVAHPAPMNASQRRMMHSVDAT IRSLEPSSIGIVANVIKNPHAFVGDYH  
1240 FQTARREAVEPRILKERVKWIFDLLAQNRPEHQRPKHVVYLRDGVSEGQYTMTIRDELGA  
1241 IREAVREIDPKYRPFALIIVTKRHNKRFFDS SKGVVGNPLPGTVVDHSVVRTDITEFFL  
1242 QSHIPILGTVKIPQYDIPVNEG GFFMDELQAFANCLCHSHQIICTPVSLPEPVYAAHEVA

1243 KRGHNNFLEFRRSHPEMVPYVDGNVNIIDCEEVTAKLAYRGTPLEAIRFNA  
1244  
1245 >C04F12.1 - L596\_g11107.t1  
1246 MMGSKYPDKLPAHTKGNPKVPLVSNSEFEVSLGDKIIHVYDVSIIQDCESRGRKKVIDWST  
1247 SSGDSAKRRIKLAVSKEIFKKALEVKKFASKEAALVDFDFSKILFSSEKLDHLCSAIIILT  
1248 PEDFDVLPSEFEGNSKLCRGTYTVRIVPTKAGSHQFRANDLEKALAKNQEDHSLRQFLEVA  
1249 TSFKPIQEGTHKFFRGILHDVRTSAPGRRDLQNGPFEIAYGISKGARIIGDMDNPKAALV  
1250 MDSKRFAVYSESKETFLEDIQKVLGDKDLKIHLPRITKMFQGVTLGHCFNKAVEVKFSSSL  
1251 SNVLAEKLTFFENSQKSFIVDYLEERYENYQCRARRWPVVVDKFPGRSGDVCYYPLDIL  
1252 YVKEGQLVPLPLQQEFGITQELLKEVSKPHLRSAEIGRAPKDLELNARNAHLREHGINVK  
1253 QAPIKLEGYRAQPPKLG YANGQTA AVDANRANWEAGRYIYPAKVDSFRYFVRQGC MGRDQ  
1254 ANLFLNKFLDMCRSKGLDMPKPQIEFIKGPLALKNLLSAEDKAVGKKKSVTFVLFVDSEK  
1255 SKTHDALKFYEAKYQILTQQVRSETTFKAGRQTMENIVAKTNEKCFGQNYAIHGDEFIST  
1256 KDTLILAYDVWHPTGASAQKRILDIPDDTPSVVGMSEFNGGVHADGFIGFYAYQEPLQERV  
1257 DVLKSYMQHILRIFKKTRGLLPKNIVVIRDGVSEGQFDMVCQHELASIRAGCRQFANA EK  
1258 VGWNPKFMVVTVTKRHKRFFVQDGHVRLNPPPGTVVDCTVTRPDMTEIFLQPHRPFQGS  
1259 AKAAAYSLLVNELEIPKQKSGSDLWLTNFLMKLCYSHQIAPSSISIPPEPVKQADEWAKRG  
1260 AANLEFLKRENGDKSLDMHNFLKSSSEGSFYDWAALS DALGYHTKRLEGTRANA  
1261  
1262 >HRDE-1 (WAGO-9) - L596\_g11197.t1  
1263 MTSTSVNLNSFKIDISETVHRVQQYELVFVLYKSFKPGFTATPSRTRVPLGFKYKYNLDT  
1264 FQNGDHWVGGYDIAYGPQNPVKIRMRKEMLFHFFFEFFKQQFSHTLAIGDVVPMMI FDCDR  
1265 TIYSNQQLKVGRGFSHTWSYIEHLPEKVQDHIDILCGNVSDFCGLSVFLNRVGEVDMTDL  
1266 GSEKNPNKGVIQFLETLLWQPLYTQFTDHVIYGKTFFDLAEKNRISVMQDGLFLATGYDI  
1267 SVDLIPDYEKDMSKLMPPVRFPGSSVFYQNYSRMDALLMSLSGTNGRDTLYQLEYDCKH  
1268 PSIVEKLSQTVRGATVQFIYDSDQIFEVDHLDPRTPHQITFLLQGRRRISVTDYFMAKYN  
1269 IQITSELPCVARKTRYGMSFYFVEVLRVAPNTKAIHKYLPADV KDMIEKGTILLPSAVQQ  
1270 RIKEAIGEMKLYSAGIRKHD MARINPFLFVFGIALVDKDRPVRIAAHVSESP LIEYCYRR  
1271 GATSTLMKTEQNHGPGVWNKSMKFLPPFLKPADLGKPVKIRFVNTFVEEVH LINRFMDKTI  
1272 HKLRLKGIDVMKERTISGSERF GKIRDARDIFGRNKDYRTMLKAAEDILTSSGADLFYII  
1273 GSTDPMNPTRDIFKLAEITKPSDKRIVTQHIGCKTLCTTVSTGLSKRSPGILESIVMKTN  
1274 MKLGGTNYTLREKDRSSGYRYGYPRSTHLIIAFDKVNPQHTDEKGEKLYHPKACAMTYMI  
1275 PHTTGLITRGTYWFQTSNETNLTM MISAFEEALKFYHKDSRGYDPEKVVVYWDVSHGEKE  
1276 VTQEMDAMMAIVAEQRGESVVRGPFLTFITVDQNHNTLLLPT EANVRDRLSLQNVTAGTWI  
1277 QESTIGESFTMVSYESDDKMTRAVKYDVKVAETHMHSIQDLTHKLTYLQNSGWRSVSVPA  
1278 PLKGATKLAKRAMKSYDIMDQIRGRSGPIEKQLFEERVKEISDWI AVKHLTNYWA  
1279  
1280 >PRG-1 - L596\_g25491.t1  
1281 MDARTGQLKSFRAASRQNRGPQTDES LICFAYQNHPRFIVKRTKSI SLLKTLILRRFDAL  
1282 ASALMRQQKSI IYDFQMVI ALKTKF  
1283  
1284 >T23B3.2 - T23B3.2  
1285 MRSRRIYSFNSSIEMSDGEIPIRVVDNRNRD DLLKILLVLIIVFP PAAVAVQANECNV  
1286 HWWISLFLMLFFIIPSYIHAVWYVFIRKPKELTIA  
1287  
1288 >WAGO-1 (R06C7.1) #1 - L596\_g19943.t1  
1289 MSDFENPNVKRPVTRIVDDVEELFERLQLEPGKPMADKQLPGTTGRKVKLQTN IYGLSL  
1290 QKIPVHRYDVNV IARLGEREVLF TKRSKEDAVSTDRKDKCRTAFELAVNTFGEQFFGQER  
1291 YALYYDCQSILYSMKPIPALEDKMSHEL SLLPHHLTDFPAFTGLDAVVVEIKKVADTFNL  
1292 NLGNLGFNLRELIEQDHS LQQFLELITSQH ALFTPADHICYGSGTSFLLNHKKYGF LDED  
1293 CPDLGEGKYLA VGSHKSVRFVEGPGGRSGAHA AVVVDTKKAAFHACENLIQKAMAIINLT

1294 P QTHCRKNEVDKLRGQLKGLFVHTKHGRRQRLFP IASIT EDTAADKQFEDPDGNDVTLQI  
1295 YFQQKYGITLRFPHAPLVVVQENKQTNYYPMEVCYVNDNQVALNQQTPLQIQKMIRACA  
1296 T PPAQRVRQNKENMRALELNN SNRYLQAAEVRI SNNALILEGRVLQPPDVYYGNGVKAVV  
1297 HPDKGSWRLQNKPHFLLA VEIHRWAIYVVG TGNRDI LDQPKFENFIRMYMAECSRSGIRI  
1298 NDPCEHRILPADPEI IKDRIKAACEGECYFMYFITS DAVTDIHKIMKYAERE CGVITQDM  
1299 RMSSANDVVAKGKRQ TLENVVNKTNIKLGGINYDIRFNSPDLNVLRNDRLF LFGFAMSHA  
1300 PQTQHERNKG VAPRSPSVIGFSANMKSSPVDFV GDCVFQEPRRDEKIGVIRGVVNNVVTR  
1301 FRDSRGYLPKELI IYRNGSSEGGYPLILKYEVPLIKKALEEVQCD AKVTLIVSQMHNVR  
1302 LMLSQINERDRAPEQNIKPGTVLDVGAVHPVYNEFYLN SHVSLQGS AKTPRYTVLFDENN  
1303 YNMDQLEYMTYHLSYGHQIVTLATSLPAPAYIASRYADRGRNLFNASNTNWNVLQDQGQLD  
1304 YNQITRDL SYGVSDLRDRVNA

1305  
1306 >WAGO-1 (R06C7.1) #2 - L596\_g995.t1  
1307 MDALKGHCESDETLYKIETALVSKSGTIRFY PQEAKKVLN WAVEPVMVEEDPYKEEDGAF  
1308 YSLCHVNIEFLASGVHCIAKLLAPFSNFRRSSATKSSSRRPKTTANVENRSATEPMTNLR  
1309 SKIAGPATKTASITVYLTMESVTTKMAHLTMAPKLGAGTGGRPVPLVTNMYQAKMMRAQP  
1310 VYRYDVAMEMRFGAKSVSLVKKTIIDDMVAIDHKDKCRAAFRIAVRLHDKVLGSPVGLFYD  
1311 LQSTLYAIDKIKDAKENTECKEIELCIPSDMLKNNDYFKDRNPDSVTITIKRVEADYQLS  
1312 LGDLSFATDASKAHLNADLVQFLEIATTOYAYLKAGDVLTYSSGLIYFSEKRRKLN GGNL  
1313 LIDGVQKSIKVI EGSQKGPQLAVVLDPKKTA FHAKDVAVSDKIYEAGFMEDDGRVHPAK  
1314 LETVKNQVKNL FVEVRYGKKPTRFMINGIDKESARVKTFLSSTGETTVESY YLKQYQIEL  
1315 QYPLAPLLAANKK VNGERTTIYFPMELCYVCDTQRVKNTQQTSKQISDMIRSCAMPLPADR  
1316 VKEIKDCAKRLQLNGDAVSGSLRSAGLSVATQLT SVQGRALPPPEIVYKDNKKFSVDPNS  
1317 GKWKATGAQKPKFLLGASINRWAMMCVADRPQRDDALMKNFAEKMVRECQGRGMRVNNP  
1318 VFYQAVQGRPDSLES MFRRAKQDNMEFLFFVQDGR LQAHKDIKFFERKYEIITQDLNQQT  
1319 CRSVVEQNKFLSLENIVNKTNVKLGGLNYSLIVNAPNTQH LFAKGRLYLGFQVSHPAPLS  
1320 DDQKAKGMKPKQPTVVG VAGNITNQPAAFVGDVFFQEPRDDRMADAMETLVRDFALRYKD  
1321 AVGVAPA EVIIYRNGASDGQYQTI LDVEVQEVIRAALTAAGAGS AKLTYMVVSKLHNVR  
1322 MPAQITG IKAPEQNVKPGTVVDTNIVDPVFAEFYLN SHQTLQGS AKTPKYTVLYDQNNFP  
1323 MSYLELMTYVLSYGHQIVGLPTSLPTPVYVAGRYAERGATLLSASRHDSMDCKFSELTEA  
1324 LYGSTKIGKNRLNA

1325  
1326 >WAGO-1 (R06C7.1) #3 - L596\_g15757.t1  
1327 MDTRSQAQGGFDTSIKVVYEMAPKQYAPENKAPVDLVCNAYRLRMPQPSSDYPARVYVYD  
1328 VTLLTLTRADGSLTLVKTKMDDYTHYVSKQRCSALEAFS QKFPGFFRTNEQRLFYDLQS  
1329 ILFTRVELPMRNLTEAMSIEASEFSRFGFAEGGQGMQRLNIVVQKTQSGT SIGLTD FSFL  
1330 SSDIAEVGQRHDL SQFIEICSSQNAYMNPDQRVTFPGGVS YERGNPGDLVDGSKRVWNGV  
1331 RKSRYRLTGAGNPVPAVVDARKSAFHKEGEMVSDKVYAMGLMNDG SVFDYNIDNITRQ  
1332 LKGLFVMVKHLNNQRTFPI LKLDKKT PATYRFTSDDGVEMSVADYMSKKYGTALEYPKSP  
1333 LVVVWMKQREVHYPMEMLYVC PNQRVTTNQQTSKLVSEMIKKCAI VPSERIKEIKHQATS  
1334 LHLHDGALREVCIEVDPNMLHLQ GKAVEAPKLKYGSSALVSVERNTGKWRTSNTKFLHPV  
1335 QIKKWAVIVLPTGGKLTGQDSQVPTKFVDLMIKALI IKGVQVGPPAYTGMSSGCQLEEDF  
1336 KECARDGYDFMFFIQDSKLQFHKDIKMERRY EI VTDLNLNTARNVVQQRKHL SLENI I  
1337 CKTNVKLGGVNYSIHIDRPEFADFFHRRRLYVGMQMSNSRVFELGDGSDVEKAGKPTIIG  
1338 ISANVDRELSS FVGDFMCGPANIEDLSSV VTEIFKYYS EEFKMRGHFPPEI VVYIGGIS  
1339 DGMPKLLRWHI PAIRHGLNTAKCTAKMTVI FTSKSHNVRLFPKNVTGERAPEQNVKPGT  
1340 VVDTGIVHPEFTEFFVTSHQTLQGTAKVPKYTVMIDDNNLSLSYLETMTYVLA FGHQIVA  
1341 LPTSLPTPLYVAGRYGDRGGVLYNAFDGKDDLYAVNDQLTFATS KKLCKGRVNA

1342  
1343 >WAGO-1 (R06C7.1) #4 - L596\_g16574.t1  
1344 MPTGEDPVLAEPVASTEAE DNASPRTPHAIHEAGDAIGLERRLEASTSARDGNFYVALGL

1345 PILQGVVGNKKEALAVGVPIELSTNAFGFVLPALPVWQYEIEIEGLLAGSERRVFFTKRS  
1346 PDDAFKIRKSQECRRLFQAIKHKYAHSFSEDNETYFYDNQGLLFAIAPLDLSLNEKMDCM  
1347 LTAEELAALSPPTYASFSEVIVTIKNVAANPMTVGHVMTYTSQVLENNRRLQQFLEVLTL  
1348 SQHMLANPNEFLTYGTRSAYLLDTSAHGLEAGHLTKDKEIKIGCEKSVKLVEGPMRGGQP  
1349 DGKAVALIDVKKTPFHIPEGTVLDKARAILNREPKPSDAPRLKKDLAELVVYTKHTSKEH  
1350 RYVVENVIADTAVSMTFPWTEEGREVTLSEFFVQKYRQNI SFPRTPLLVARFGREKLIH  
1351 LPMELCYVARNQRVTSRQQEVDNISAKMIKACAIAPAERQLQIQETVNALQITSSNPYLR  
1352 AARTKITAAPLIVTGHRLEAPKIAYANNEVLS PDARFGFWKPPNAHRRPKFFKPAVINSW  
1353 AIVVLPSQAEFLQGDIISREILARFTDLFRSECRDRGMQIGQPVFTEFMKADVQQLRDLI  
1354 KSLTRPDPSVCRPPLRYVIFITNGGITFCHQPMKYFERETE IITQDLKMQTVVNVVQQNK  
1355 RLTLLENIVNKANIKNGGINYVVIRNMPGQRPI LKPGRLVIGLAMSYSVRRQAE EISTLPT  
1356 AVGWAANITREEGELIGDFLLQESFKKDRVAVIQTI VDRVADAFKHPGGPKEVILYRSGE  
1357 EGRFRAILEEDLAVLRATFDNMAKPKLTVIAVQKHHNLRLMPTKINRQDRPSLQNLVPG  
1358 TVVDRYVTHPTFTEFYLN SHVAIQGTARTPKYTVLQDDANMSLEELEEMTFGLCFNHQIV  
1359 SLPTSLPSPLYIAGRYAERGMTLYRQHQEHEEDQGTSASSPSSGSSGEPHLDVERLGTI  
1360 SYGSSRKLKHLRVNA

1361  
1362 >WAGO-1 (R06C7.1) #5 - L596\_g20961.t1  
1363 MEREGTELRPSTIVRQTQNA AASSAPAAQVSTSAGAPPAAFGIRGPATSAETS FYSQLVN  
1364 IPTPPLEEKKQPGTTGREQFKLRTNVFGLSLPKDAQVFRYSVDASGTLQRNDRRIEFAKR  
1365 VGDDITYLNRREKCRHVVDQVAKNPAIFGDRRELFWYDSQSILFSRNQLDIGSEAQFVL  
1366 DQSDIGQNTLFEFGAHLKMVIRPAQTNFAVSIGDLEAYIQAE LFESDHALQQFLEILTAQ  
1367 YAFNTPTEAMSFGTRTAYLLQPEKYGFKPADCADVGDGKFLGVGCDKSVRFIEGPGGAGG  
1368 QRAALVVDLKKTA FHKVQSLYEKAREILNNRDPKST DASRLRMQLKGI VVETKHGSRRQE  
1369 FAVDNVADTPATKKFKDLTGHEVTLQQYFQQKYNITLQH PDSPIVLTDRTKKFAAFPME  
1370 VCWVVDGQRVALAQQT PVQIQKMIRQCAVPPADRQRQILGLVQGLQLNSENKYHKAAGVG  
1371 ITPTALQVQARLLQNPIIVYGGKSTMRPDEKATWRLARQKPVYLPVKIDKWAMFVIRGG  
1372 NRSDCVDQAILNQFSNMVQECRARGMTVPDRPTGLSFIGASREEVQETLEKAKTEGNQF  
1373 CFFITNDVTHIHQFMKFQERKLSIVTQDLKMSSAFD VVKKGKRQTL ENVVNKTNIKNGG  
1374 INYSLRFDDPVFNMDKLLPKDRMVI GLSTTHPKPIPGKKEQDQAPQDKKKQMHEQRTGPP  
1375 VPSVVGVAANVLTESIEIVGDCLFQQPNREEKIAL LQPVIRSLMLQFMKHRGMPPVEIVV  
1376 YRQGTSEGQFRNVMELEYKMKVAAALQOGLNPKITFIVVQKMHNVRLMPTDCKAGDRAPE  
1377 QNVKPGTVVDTMVTHPKYNEFFLN SHVALQGSARTPRFTVLYDENRLPMDEIEALSHSLA  
1378 FGHQIVNLTTSLPAPLYIANRYAERGHNIFIASQEDYTKSKSSLQSPHSTTIEDNLDFSR  
1379 MMNELSYCNSELRDKRVNA

1380  
1381 >WAGO-1 (R06C7.1) #6 - L596\_g322.t1  
1382 MSEELHAASKLKPTEGIASRKVKLTTNHFTLSFKSSKPVYRYDVAMVHYMMTKDGEKSRD  
1383 MCKGERDDAAILERQRRCLVLM EA AKVAHFTPSKSCCVYDNSKTLFSSEKLENQCAQI  
1384 RIEGEHIPDGFKNHPKLKQGYFFIEITPVSTNHKFTIDDLKSGVSDDLNTDHTLRQFYE  
1385 ILTNAYAVTNDSHMVFGNLYDNDKGESGRKKLKEARNLIFGVNKGARIEGSSSRLVAA  
1386 LVLDSKKSTFFDDANNKGLAGNIRDLLGSHFNAQPHEVVIGDHN RKTVVV TYLKDLRVYCR  
1387 YQEDRDFVIAGVTKEPIEDLYFEYGSTKTSVM DYHKQAYNTKILYPHWPVIMQGPRSKN  
1388 YFPIEVLGVSKGQRPVISKQTPGQMAETIHDCAARPHIRFAEILKKLDGLNLASNPNEF  
1389 LQSFVVKIDCNPIQVQAHRR LAPKMVYAGNKEVDYDDIKGNWFANNAYILPAKIPKWFVI  
1390 TDRIDVSIVRK FAGILKDTMKMKRMTVGE PQFLEMPVAQLDGFLGKMAKELKPEDQSPFI  
1391 LFADTND DSHALLKLYEAKHQILTQH LRARTVIECLEPRKRLTVGNICNKL NCKNYGLVY  
1392 AVNPQDHAKTMYLSKGDVMVVG YDVSHPEPQPAHERRLGIPTT P SVVGF SFNGGVHPGM  
1393 FIGDYQFCAPRQERVDILEERIQWMLRVFTTNRKTLPSRIVIVRDGVSE GQMPMVLQHEL  
1394 ESIRRGVKKLKAGYNPKFLLVTTTKRHAKRFFAETERGIDNPMLPSVIDHTVVRPDVTEF  
1395 FMQAHKAIKGTAKMPAYTLLNELGMTLDQIQSFMMGLCFEHQIVNSPISIP EPVYQSDE

1396 WAKRGHSNILAFFRLMDCPDPQKPSQKMIQRYLKASENPTTGQPEVEGYDWVRISKMLCY  
1397 RGRRLKTRANA  
1398  
1399 >WAGO-1 (R06C7.1) #7 - L596\_g9675.t1  
1400 MLEIRIPPIVDDQKRRETELENTVNVRTNVYEFELPTGTSEIYHYEVAVIGKLGKSGRTVD  
1401 LTARTTNDVLTLERRDSCRKVLGIVSERYPAVFDHNLVIFYDQARLLFTSKNVEINTAAGI  
1402 YSVILGCQDHLKGDDEMFAAFTSVEFRLARVSVVEVGNVQKYLNKNLRLVNHLSLEQYLNVL  
1403 TSQHVANKTITTFGNESVYLEQDDQCGVRNNVDLGSGLKKTGFASRLIEGLTEQPAAA  
1404 LVVDLKKAAFHVQQTVDKARLILQADRKRCCGSPRIEDTEDLSRELVLVETKHGSR  
1405 VRKYKIAGFDKSTPASRSFEKDGRNVLIADYFAQQYKVKVENLDTPLVIVRGYGRDFHLP  
1406 MELCYVKDQRVGLKQQTDPDIKMIKQCAVKPVVRIAEIEKIVKGLRLIDERKDI LGSKV  
1407 GIKDKPLKVEGHLLPPPLIVYADKDTCNQRVPPSREPASNGTWSLTTANTTPAAFFKPAK  
1408 IEKWAVIAIHTEDNGDPHDERNKRI LAQNTLETNIIHQFATVFTTEECRNRGMTLPEAEHV  
1409 KFLDDTSTTVRDFIHQAKLSFVLFVCNNAITHIHQSMKCYERKFETVTQDVRMATVNDIM  
1410 TKRRFQTLNIVAKTNVKNGLNYNVEMPSSKNGVRELMPKGRLLVIGLTVRVVVPKSPKE  
1411 IEEDKKKAEEREKQHKKARDSKFARKESTTAKLKPIMTVGYAANFTDVPTEFIDGHLVQE  
1412 YRETGDILGMQIIFERVVLEFKRARGMFPTEIVIYRECTENSDFIGQLQLEQMLLKSIAIK  
1413 STASFRPGFEPKLTLLIAVQKRHHVRLMPIAMREAKAPEQNLQPGTVVDRMITHEPTEF  
1414 YLNSHTTLQGTARI PRYTVLKDENNLSMHEVQLMTYGLSYAHQIVNSPTSLPTPVYVAVT  
1415 CAERGMNLAKHNFRAMNIKFNANDDYSKLEDQHVDI SHLNEQLSFGNCKLSSIRNNA  
1416  
1417 >WAGO-1 (R06C7.1) #8 - L596\_g18735.t1  
1418 METLTKAVANMPPVNLASKREDAKPNAQERALPLQTNMFSLSMRDEVPVFMYSVDVFMK  
1419 VRSKAISLVKHSRDDYIVIDRKNKCRAAFRFVVRANPAVFGNPGKIYYDLQAQLFTLEKL  
1420 NMDNEDEGLELVIDGADARRSTDFAEIPLDGIVVQIKRAGPKFDLALGELQKLFVAQEPK  
1421 SHELLQFLEVATSQYAFLTSPDFVTYPAGLSFIKQKDPKAGTELEGGKLLLDGAQKSVRL  
1422 IEGEKKTDDGGKLAVIDAKKTAHFHKTQYQKVIKVNDFGFLQSDGTVHRMRI PDLAKLLK  
1423 HIYVESRYRKRTQRFLINDVNPDNARNKMFTRNGVMI SVEQYYREVNITLRYPLAPLIV  
1424 SKPMKSKDSEEMVCLFPMEVLFVCPDQRVKINQQTPRQISDMIKRCAMQP DVRVKETKN  
1425 YAEKLQLN GPASQA CLNYAGVSIANEVVKVSGRKLVAPEIQYKDKKIAVDSNTGTWRSSG  
1426 REKPKFLVGS SLKKWAVYLLGVRQPLDENLGRKFVMMLEEARARGMQWESPTAVKGV L  
1427 GHVDNIEKLFKAAQKEGLEFLFFIGDQKVVHTELKFFERKYEVITQDLDLKTCRNVEQ  
1428 GKFLTMENVI AKSNMKLGGVNYSIQVNDPTIKQFFKPGRLILGFQVSHAAPLKPDEIAAG  
1429 VKPRVPTVVG VAGNVSKGDPACFVGDFFYQTPREDRMLEAMDTLIADFAQRYKRATGKDV  
1430 AELI IYRNGASEAQYTDLVRDEI PSIRDALQSAGFRGVKLTVMVVTKLHNVRLMPVAIKT  
1431 GAKASEQNIASGTVVDKGI THPKRAEFYLN GHVTLQGS AKTPKYTVLTDQDQFTLQQLER  
1432 MTYALS YGHQIVSLPTSLPSPAYIAGRYAERGALIYQGFNHTVQHDADLQTLNGLTLYGK  
1433 SKLGDKRVNA  
1434  
1435 >WAGO-1 (R06C7.1) #9 - L596\_g18947.t1  
1436 MSNPSHNGRRPGANGNGSQPGGLEMRAATHVRQIRSGASSGMSSEVRYQELTQAG  
1437 QQLHLEEKKPPGTL CREELIVHTNVYGVGLPDVQVRYDVDACGFLERNDRRVEFAKRAV  
1438 DDVADTTRRNK CRAVVQLVCQNYANIFGNHREYFWYDSQSILFSKNMLDGI PEREKKEFV  
1439 LTQEMLAGNPMFRGFKNVRLNIQRVSN SFAINIGDLTQYISADLEENDHSLQQFLEILTS  
1440 QYAFNTPSEAI CFGSRAAYLMQPDKHGFKAQDCADVGDGKYLGVGCSKSVRFIEGPRGDQ  
1441 RAGLVVDLKKTA FHYESLLAKSRAI LNREPRGNDAGR LRQQLKGLVVETRHAQKPVRF T  
1442 IEQVSD ETPRNK FMLQPDNREVTLLQYFQEKY NITLES PDSP IIVGDRLTKFAVFPLEA  
1443 CFVVDGQRVSM DQQTPTQIQKMIRACAVPPADRQRQILSLVQGLQLTSSNVYHQAGIT I  
1444 TEKPLLVRGRILPNPKI IYANNVVVSPDAQKATWR LDRQKPHYLI PAKIEKWAMYSIRAG  
1445 GRSDVLDQPTLLRFAQTMVTECRM RGMQLGNPGEVSFIGCAQEEITATMEQAKKDGCTFC  
1446 FFITNNDVTHIHQHMKLLERQ TGVITQDLKMS SAVDVIQKNKRQTLN IINKTNMKNGL

1447 NYTIRCEGLSNEQLLPSQRLIIGISTTHPKVAQTALEDRDRADKNE DPLTKKKPHHEKHH  
1448 RSEHITPSVVGFAANFKKDPIEFIGDCLYQYPQRDEKIGVMQPLLRAVINEF SNNRGVPP  
1449 NEIIVYRNGINSISTMELEFLMVKAVARCQGITPKVTMIACQKMHNMR LMPAKINPRDRA  
1450 PDQNLKPGAVVDSNVTHPKFNEFYLN SHVCLQGSARTPRYTVLHDEGQFSMDELQALTYN  
1451 LAFGHQIVNLTTSLPTPVYVAAAYADRGHNIYGV SQKDYTKSRTSDLNSSTLEGNLDFNR  
1452 IMMDLSYSNSELR SKRVNA

1453

1454 >WAGO-1 (R06C7.1) #10 - L596\_g1747.t1

1455 MASVDVELREKTKIRQEADRMFKEDYGIDV GSTEMPAKMMKPAAQNTMSLVTNLF PVKTH  
1456 QQMPIYRWDVDIT IAGKNGKTFSLTKKSDSDAVAVNRK LKTRSIFKRLVAAHPEKFGKLE  
1457 ENYYDLESMLF TTKDLSTDQEAQDFVVDGLDAKIIPGIASANVILKKVTDRYQVDLTD FR  
1458 HLTRDVANVDLSHKQFLEV VTSQYPLMAEDYVCYPGGVSFSVKEKTTPLAEGKYLGHGVQ  
1459 KSVRYIENDGRSPCAAVALDLKKT V FHSEINALEY LKMQNTYVKQLIESKQRAKDNDMTL  
1460 KTACQRIKGLRAYTQHTKRQRVVTMDRVGPETANEARFQLQD GEEITVAA YFHRTYGAPL  
1461 LFPNAPVAVERKPGSKDVNYHPLELLTIAENQRVTGELPQAVISDVIKQAAV VPLDRQQQ  
1462 IMRAHRDLKISTNDYVDNVGTSIAPQMMQVKGRLLMTPKV VYGRNTQIEAREGKWRAERK  
1463 TFLKPAGAARWTCMMLTNNRLG EQMMHNFLNKYVAVCRRNGMQMADPIEPFVVDWRRTDL  
1464 QTEIDAFMKDCTQQYKLEFVLCIQDNNMHEHKY LKFLERQYGLITQDICTRTVERCIGNA  
1465 SATIDNIVQKTNV KLGGLNYGLEYS PDGRHDVLSATTMFVGLGMSH SKPPKPDATGQEP  
1466 SRPASVIGFAANVLAQSFAFVGDY YFQKADRDEKIFAIVPIVTR LLEQWCEHHGGQMPKN  
1467 VVFFRNGGSEGFQMI LKYEVPLIKFAIEEF AKKSAVQQQFETKFCLLVANKRHNVRFFK  
1468 SNITSGGRAAQNLQPGVVVDSGVTHPVFSEFYVNSHTTLQGTGKT PRYTVLHND CGLTL  
1469 NQLEHFVFALSHGHQIVNLTTSLPTPAYIANDYAERGM AVLGQFLRASGAPVDEYETFNS  
1470 KLTFAAMHPGSKFHHC RVNA

1471

1472 >WAGO-1 (R06C7.1) #11 - L596\_g1696.t1

1473 MERFKKLPTTTLKARQVTLVTNHFR LNPTGRTVFRYDVAMSHTRMVKGTEKIRDLCCKGD  
1474 RDDAAILERNRCLALMDAAFAA PFASTSAAVIYDNSKTLIAAEELDMRQCACIRLEGG  
1475 TIPPGFINHPRFKEGYFTIQITPTSSNHRLVINDLEAALAGDEANPDRSLRQFLEILTNQ  
1476 ETLKKN SFMAFYGNLYSREAADQRK LREARILKSGMSKGARIIGSSSDLVAALVLD SKKA  
1477 TFFDDTNKNGLAGNIRELLNRAPNDAPSRVHINDFDRPDIVKYIKDLRVYCLNKPDNTFQ  
1478 ISGLTREPLRNVFFDMGGEQLSVLEYHQ RDGARLAYSHWPAVIVQSPRGRNYFPPIEVLGV  
1479 CEGQRVPI SKQTPGQMKVVVNDCAVLPNVRFAEIHQMLNALNLASTTPNRYLQAFGVTID  
1480 VRPMKITAYRRQAPKIVYGGNIKVQYDDVKGSWFS SGPYVLPAKIPKWFVVDGIDQRTV  
1481 QQFVGLVQQAMKDKRMEVAQPKYMEMKVAGMDAFLSSIVKSLKPGERSPFVLF TDANEDS  
1482 HAFLKLQEAKHQIVTQHLR TKTVRECIEPRK KLTVGNILNKLNCKNFGLNHLVAPDHEKN  
1483 YLQKADVMVLGYDVSHPEPQSPQDRRLGIPPSTPSVVGFSFNGGQNPEMFIGDYQFCPPR  
1484 QERVDILESRIQWMLKVFNDHRK KLP ERIVVVRDGVSEGLDMVLQHEMASIRRGAA MIK  
1485 EGYKPKFLLVVATKRHQKRFFIDKSNGEVDNSMPLTVIDHTVVRPDVTEFFMQSHKAIKG  
1486 TAKVPAYTVLQNELGMSLDEIQAF LMGLCFEHQIVSSPISIP EPVYQADQWASRGHS NVL  
1487 AFFRVMDIEDPEDPSKMINRYLKPVEDPLPGRPKFEYDWTRISKLLCYRGRRL EKTRAN  
1488 A

1489

1490 >WAGO-1 (R06C7.1) #12 - L596\_g18749.t1

1491 MPLITVEMSLFVAEGSVVIFFN AIVLLIIVTDSTLRESTELMFIGGLCFADMTDGIAYFY  
1492 AGIHRLCNILSR TDDVMISRLECFQKPFMFFFYGYQLPAMMIFIVALDRFVAVFAPMWQ  
1493 RKVERSSKLMVMVAIFLWVT LTYVINVFLFHSYSTGYTTAQCFAHDVFLSQLWDFIIVQR  
1494 SILILLCVLLYVPI LIKTRRIFQSN DKSVQSN SFNVTIGLTMTC SVLLLFIPDVIYFDL  
1495 IMDFHLILYLLGLNKCVANVFIYTLRQKEIRKKIELICRRVFCNLKGPFDLELSKRRQRS  
1496 NITRTLGI AKRCQSLSAVAWSVVLSSAVPQETWHVISRPPLGEARFDGRIDKGF IAPLLY  
1497 FYVSKMSAGPSNLQPDVELR PATKIRHAAEIKFKEMGIEVGIPEMPPKIPVPPNGNVKLT

1498 SNLYAVRTSSQIPIYRYDLDTISQRNGKQLALTKKSDSDAVSIDRKLKTKIIFFKMVQT  
1499 YPELFSGVHHCYDLESTLFTLNDIMKDDPEAEPKTLVIEGLDGAKFQGTTSATVILKKC  
1500 HDRFEVDLTNFSHLELNIESTDLSHKQFLELVT SQIPMMSDSFVTFPGGVSFMSNASTTE  
1501 LPEGKYLGHGVQKSVRYVENPQTRKPMAAIALDLKKTAFHAVLTGLDYLSQIVDDRPLHN  
1502 GQKLPNSVFGSFGALKMKGLRCCLQYGNRYREVVIHEISNKTAQEHYFDREGQQITVEN  
1503 YFYQMYNLRRLKCPTAPLAGEKKPGQKALCYPLELIRVLDNQRVTGELPQKVIRDVIKHA  
1504 AVVPALRIRQIQDSCADLGLFGNDYLNQVDTVIDSRPIGVEGRQLKNPKMVFVGKNTSVES  
1505 RNGQWPNRGAMRPPFFIPSTIRKWSVLMISNLQNGFASETMHTFVSSFINECRARGMTLP  
1506 APSDPWALNAREELKPQMEGFFSECPGLGIEFVVLVLDQDDCFHEHKFLKFIERKYNVISQD  
1507 VNMKTVQKCLQRAAATLENIVQKTNIKLGGNYSIEMTNPAGTSNVFQPD TMYVGLAMSH  
1508 SKPPKPDSTGREPPK PASVVGFAANVLPQNFAFVGDY YFQAADRDEKIDSIVPIMHRILD  
1509 MWCQHHEGQMPKNILFFRNGASEGQYKSILKFEVPLIKHALEKFRNCCGVEQMTPETKFS  
1510 LVVATKRHNVRIFKANIQAGRPNEQNLPPGIAVDRSIVHMPFAEFFVNSHTTLQGTGKTP  
1511 RYTIMHNGADFKIGQLEHIVFGLAHGHQIVNLCTSLPTPSYIAGDYADRGMVVLHEFLKT  
1512 TRAEADQYDTFNEQLTYAALQPESRFHYCRVNA

1513

1514 >WAGO-1 (R06C7.1) #13 - L596\_g18732.t1

1515 MLGKWRTVRVEFEAAEELDFRWEFDHMAAIFREALQPHCRCLLGGFTRSTFQINTVYPKE  
1516 LQSPAILFPDDPNGLCKRNLLVQVSLFLLLKSFQLHDFSSSQLSGRFLLLFRTCGESECE  
1517 RKRPRFATFGLPNLRSSANVQKLRANSIAKTERAANRRSNPLQTNSSPGPARKTAPHRN  
1518 PAANPKTCFAIGVRGQVADTVDRSFVPRGPLLTVAPPALSPSALPVFSPIRLFTPPHPAA  
1519 YFRQSTMDLHTKLAELSVADNAMKPTPATEFKETVEVSSYFEISIGQNALAYRYEVDIL  
1520 AISQRGQEKNLTRGPADDGAASLRRQLCHEVFNAALKKSNFGTKQGVRLPVVYDCRATL  
1521 FLPAPLKMEDEVVILDKDADFAEMSKETLFTLDPTDVIRVRIAPTTQNAFEMDLRAELM  
1522 KADFCEPDCEFARDRSFRTFLEMLTSVNAVRSQSHTQLGVGNFFDNDPSMIVDIGDAKCL  
1523 RPGLSKGVRVVEKDDRPYPALVVDKSSCFFKAQNLAQS IMELGRQKGRPDMMWKTARFL  
1524 FKDVRVISAPVDKGRVKSFP IRAITKMPATELNVKVKGFNGSLADYYARVLKIKLQHPN  
1525 FMCVEADVPGPKKEFFPVEVLFVSPNQRVPIEKTEANQSSIVLKANAIKPDRRIKNIKDQ  
1526 MSRMSLFANTPVMEAFKVFVCPDFIRLTAGVRVAPQISMGDRDVKIDQKKANWAKEANGA  
1527 NYKQESFSLDSWAVLYANTEPGLIRQFVQRYVAAAQRRGFTVREPTILKFNQDFERTFSE  
1528 CIDNDIRFLMLIDPKYVKTHESLKLFERLCHVLTQHVSLE RVFDVVQKNSRMTLDNILSK  
1529 THMKLGGNLYVPIIENVGSRFALDSGEVLVIGYDVAHPTAMSPQERRLVRSNLNDVKSLE  
1530 PSVVGITANCSEFNPHFIGDYHYQTARKESIDVSI LERRMVWIMRLLLEKNRPDQCRPKHV  
1531 VILRDGVSEGQYDMARNEEMAALRDGLKLVDP EYNPTFTLVIATKRHNKRFFGQDGRNYV  
1532 NTDPGTVIDKTVVRKDVPEFFLQSHYPLQGTVKI PQYNKLHDEANFSMDELQAFVNCLCH  
1533 THQIVNLAVSIP EPIYQADELAKRGRNNYAELRRRFTSEVPRMNEAGVIDCNALTKILSY  
1534 WDSPLEAVRFTA

1535

1536 >WAGO-1 (R06C7.1) #14 - L596\_g20920.t1

1537 MEPSSQPPPTPSLPENMAPKIVGPRDIYERPVIASNLFPLEMKADVPIFMYHVQIHMKI  
1538 GAHEINLVKRHTDDYMHIDHKDKCRAAFRFAVRSSPATFGDPKGLFYDLQGLYSDHKLK  
1539 DVLGHDLIVREEIGIPGEEAGRAPEFKNL GVEYLRVEVEPTRENRP TMI LGEMMATRAKM  
1540 QESVSRELTQFLEVATSQYAF LTPSKMVTYPSGVSYFKPTTAE PVQVFPAAKELLDGVHK  
1541 VVKLIDGT KRGE MAVVDPKKA VFHKS NITVIDKTVEMGFLDRGSGTVLRETIPELAKKL  
1542 KNLYVETRYGKKPIRF AVHDVVLDTARTSRFNKNGDMTSVEEHFKDEYNVILKHPHAPLV  
1543 VSTPLKKNPESLQLLYFPMELLFVCPNQRVLFNQQTAKEAFAIKKASTILPENRLKEVVN  
1544 SASKLRINGASVQGCFFKAKIEVGNAPLTV EGRSLVPPHIEYRAQQVQVDAVSGRWRSSS  
1545 RRGKPYLVGGKIERWAMYVLSQAPSQAEEELGKNLLAKMEDEFQARGMQIAQAKFLATV  
1546 KASPEYMKKIFDRAKAHQLEFLFFIQDTKICLHKEMKYERKYEIISQDLNMETAKAVTE  
1547 EGKYHALDSLIAKLNKVG GTNYGLVGPSIPDLFKRGKLYIGFHASFSANPADAEDPTVI  
1548 GSSANVTQTSAAFVGMFFQEKNDVDMNTAMAKATLKYVLRVYKNVHGHAPSEVVIYRSGS



1549 SEGQFGQILRDEVPALRNALQNAEAEDEAKLTLLMVNKQHSVRLMPSVIMPGSRAIEQNIK  
1550 PGTVVDTKITHPRFAEFYLNHQVLHGHTAKTPKYTIIVDDSAHQIEYLERVITYALSYGHQ  
1551 IVDNPTNLPSPLYIAGEYADRGLTLIKAKRKLGD TVDVKDLEKDLPYMASQVLADKRVNA

1552

1553 >WAGO-1 (R06C7.1) #15 - L596\_g16096.t1

1554 MSNNERVKTIQNGMETISISATMPVKKKI ANAPGAPLQVATNIYKVGLSQVPIFRYDVDI  
1555 TLKLPNGKDVKVVKKDRADHVI IQNKNKACKTFQKAVQKFPNVFGNVELFYDCQSILFSL  
1556 RKLNISDKGQEF T LSPNDLPEVYGHVDSVNFIVKSVREKYQLTLNDLGFLSTQEVNGIKH  
1557 DLAQFIEVATSQNALFNGKHSVYDGGVSYLMSTGEAVRNEPSKQLITGVQKSVRFIEGQG  
1558 KPEATLVLDLAKTVFHKGGQONLYEKAISSVRNWRNDQVDRREIKSLSQQFKGLSIKTEH  
1559 QKTKEYELAGLSEFSAHFKFDHNGKQMSVAEYFKKQYNKNLMHPNAPLAIKNFFMGKR  
1560 NTMMLPLEICTVLPNQKVSQQETPLQTA AVIRYCAVLP SDRKEQIYTQVKELGFWGNKN  
1561 LPITVDQQPIVVTGRQLPQPSIVFGGNQTVSVNPANGKWQATKGVNRNARLPFALPGNPM  
1562 PWAVVLVGQGTQDTAKSFALAVKTECESRGLKMGDPSAVIQANYEDIEINARNNTFENLT  
1563 KMTPRVKFCLVIENERSPAYIHALIKKNEQNWRITQVTD SATVQQFNFALGPAQGYGKG  
1564 QTLNICLKTNVKFGGLNHF IKPPQGHEKVFASDRMYVGLGISHASPI SDAQRARNVKPS  
1565 PSVIGISCNYLAHPQALAGTFVVFQEPRENKMVESLKKVFFDLATKFKNIRKVIPEVVIY  
1566 RVGASEGQYATILEQEVPIRAGLKEAGCNAKLVLIVPSRTHNVRLFPQT IKKEDKASFQ  
1567 NLKPGVVVDSVIVHPKFPEFFLNHCTLOGTANTPRYNVLVDDLQAPI SDHEMATYMWSF  
1568 GHEIVGSPTSLPSPAYIADKYAERGRVLAVEARRKDEKFLNEEGEVDFTEMTAKLSFAGT  
1569 PLANFRVNA

1570

1571 >WAGO-1 (R06C7.1) #16 - L596\_g21757.t1

1572 MSEISVDELSSYISLESMSIGSSSAYHKKAPVPDSSLHHPVELLSSYLEIGIQEGSKAYR  
1573 YDVEIEASKSGSLTRGPADDGHGAMRRKVCYDLLYAALAKSKGFGTGQDYHMLPVYNRQN  
1574 HVFFAQPLPEDFITIDLDNADFTGITNYLYYMTGATESIQVKISKPQSEEHVLDLYESI  
1575 FDTAPLDCDGNLEISSRDRSFRTFLELLTSGPASFTGSHVACGTSFYEATNGKDMKD GKT  
1576 MRAGLKKGVCVIERDGILYPALVVDSKTGAFFKEQNLLKSMKEMNNGEVPRSAAPMWQK  
1577 ARKLYKDVRVLVVS NVYKNSTQRRLTFPIQDFTREPASRQMMNMKGFRGTVEQYFRQHN  
1578 LSLHHPHLP CAI HASNSKI PVPTFFFPIELLFVCGDQKVPLEKSDRFHSETLLRENAVDPK  
1579 LRKERTEVQLKKLGLWREKREKMSVDDKKDLSEDGTNLLTAFGVSIINEFIPIRAGV RVA  
1580 PTIEVANSEKISIVQKTANWEKKL TNKRYFSSVEITNWAVICSQISAENPMIVRFLKQMV  
1581 NVSKRRGIRMDSPMKYSLKSGSREDFDDIFRHIAESGRHFV MYFSP LKEKQHDLVKWMEH  
1582 HYSVVTQHVCLERIENVVTGRIQILDNI IHKANMKGGLNVI PRIEKLQRMEIESGDFL  
1583 VIAYDVCHPAPMTSRERVLMSM TSFDP SIRS LDPSVVGIVANCVAHPHAFVGDYHYQAS  
1584 RKESVDGRILVDRVKWIFELLAERRPNASRPKHIIILRDGVSEGQYKMAEHEELSAIRRA  
1585 VAMIDPNYHPTFTLVIATKRHNKRFYDKNEGIAVNTEPGT IIDKDVVRGDVTEFFLQSHF  
1586 PLKGTVKMPQYAILCDEADFSQDEIQAFVNCLCHSHQIVASAVSIPEPIYAADELAKRGS  
1587 NNFAEHVKI HGRKSLRKDPMNPNLIDFEALTHELAYWKTNLEAIRFNA

1588

1589 >WAGO-1 (R06C7.1) #17 - L596\_g18751.t1

1590 MSDQPSSSHQLDVQLRPATII RQDAEKMFKELGIEVPEP IMPARI PVPPNGNVRLVSNFY  
1591 PAHVNGQVPIHRYDVEMTIARRNGSQLALTKKSTSDAVSIDRKAKTKAIFSKMVATHPEL  
1592 FTNMYSCIYDLESMLFTLKEIEEVNLIIDGLDGEMFQGTTSATVNLKKCHDRYELDLTNY  
1593 GFLQADVGSVDLSHKQFLELITSQIPMMSEEFVCFPGGISFGYHVDATPLSDAKNLYHGV  
1594 QKSIRYVENPATKKPMAAVAVDLRKTTFHQ SINAFQYMCAQVQVDRNGCLTNASSLTKVS  
1595 KAMKGI RCKLTYGRRYREMVIHAVVNKSPRSTFFKRGEQDISVEQYFYEVYQITLRYPNG  
1596 LMAAEKKPGQRELCYFPMELLEILDNQRVSGELPQAVVSAVIKQAAVLP AQRRQEIQQAC  
1597 NDIGLFDNEYLRNIQT TVEPRPIEIEGR LITNPKLIYGNNVLVDSRKGQWPNRGANKPKF  
1598 FLPAVVRKWTFLMISEQRNGQATGTMNGFLKEFIRECQMRGMTLPHSPSPYVLD TNRNVE  
1599 DQLEEFMRDCSEGDYEFVFLVLDQDGIKFKHKLKYLERYQVITQDLKTQTGQRCLQRAAA

1600 TLENIVQKTNMKLGGLNYSLQMTNPGGRKSVFDESTMFVGLSMTHGKPLKPDSTGELPPR  
1601 PASVVGFAANTLPQQFAFIGDYFQAADRDEKIDSIVPIMTILLTKWSKHHDGQMPMNVV  
1602 IFRNGASEGQYKNVLRFEIPLVKYALEKFRFAADVEQIHPETKLCMLVSNKHHSTRIFKT  
1603 NVPVQGRAPEQNLEPGIAVDRAIVNPVFQEFYINSHTTLQGTGRVPRYAILNNDAGYALG  
1604 HLEHIVFGLAHGHQIVNMTTSLPTPAYIASDYGDRGMVILTQFLREFEKLKGYEHPVDAY  
1605 QEFNQSLTYASLDPDCKFNLCRVNA

1606  
1607 >WAGO-1 (R06C7.1) #18 - L596\_g4755.t1  
1608 MLSVVEEQAIHPGRCGKRLQVNSNVLNVRLPASRIYHYHIDVVGHKRCGPKIVLSRSFFND  
1609 SLGHERRTVLVNLFNWLAYFNEERIFAQPRNFLFYDAKSPLYTRKKNLCKCGEVVTISTA  
1610 QLTEAQIEGLEEFLCVRVKFTEADPFEIVLNEPEEFRDLGGPLQNFLETLMQHSFLKKNY  
1611 ESVMNPLIQVAADYEARGIPEVEASTLVKDGSRIFPAIRTKLMNMEGPQALTMIEGLHEA  
1612 DHACLCFRWEPPFAVHSSVTLQKARRALEKEGFESFFPFELDALNRELCGIRVFTELSGT  
1613 KKYFIVDHSV SERTAWTAVDQGTLKDFLKTEYEVTLKPKDLFLIVEKRGSLDIYHAMELCT  
1614 VAPFQORPHKKNLNVPPRFKWDCHQMKNKASPSKHTDHAKRLRESVGLVNNVFLQSGSVTL  
1615 ATEPMEVTARILESPLRVKREGLFAVKSKEGWRYPTTHFVHSAKIERWGVCLIFQERM  
1616 WCDRYQAHIRLNNLMKVISDRAGGHGMRMAERFQEPYNVPIREGSSLSQIEQVRLCFE  
1617 RCKETFDPQFLFFVIQEGIHGLRDCIEAFERKYQIAALDVNNNEALKMALAHCSSRQKSP  
1618 MAQVLTSTNIEAEKALRTLMAKINTKMGGNFEVVPNHANRLLLQDGYLFIGIHAFAWY  
1619 EQQRATVVGAAANLRYPMFSGDARVRKFDESLPEFLAKIVKRCCIQFNKVRGVDPOHVI  
1620 IYQSQPSKDLCLIVDRTAILLGEIGISTELTYVFVDEHHDIRLTNTHLNNTSVIEEQNL  
1621 LPGTVIDTHLVRKGASEFFLNSHIGLVGLSEVPKYTAHDFRSGLDGDNLQSLTYTLCYAV  
1622 QSLNAPVSVPAPLYVAKNKARHGASCLKLTGKVGARDFVN

1623  
1624 >WAGO-1 (R06C7.1) #19 - L596\_g20173.t1  
1625 MADEVIGRMRQLSICDDPAYALAPKLQRADKKSFVQHVDIVTSYVRINIVGPAKSYRYEV  
1626 TIEALAEGREPNILTKGPADDGHAVMRRTVCYFLLYAALDKSGAFGTGLGHELPLVYNGQ  
1627 TLVYFAKPLDRDVIQVTLQDQHDFANVPEELLYMVSGNDTVRISLQKALVDSEMDLQTM  
1628 FETGQADVENLSTHRSFRFTFLEMATQQAHAHYAQSYSYTSIGNAFFEKDPSRTRSLGDGKII  
1629 RPGLTKGVRLIERDGVVYPALVVDARSAAFYKEQNLFLSVKECMDSDGDPNMSMNDKWDR  
1630 DNLFRGMSIFLAT

1631  
1632 >WAGO-10 (T22H9.3) #1 - L596\_g19923.t1  
1633 MSFRIPKRRKPEDEGAGGTIPPKQNYSSSSSYASASSSSSRQTSNGGKNASVYMNGFELQI  
1634 GRSVEIHKYEIKLFGVFRKRNGDEDKDLTQGSKEAKDDISIQKRRRGCWEIFRAVVREN  
1635 NSLFGDRNHRFVYDCGLIFYSIDAI F PETETKTGTDFDVAI LSRECQDY YGQAMK MIEYSI  
1636 KKVRDGTFTLGVAPEDKDDRSMQQFLEVLTSQGVYAEGLDNLI FRNHRYDVKYDTPVLRN  
1637 KPEY PFCVRHGSSKSVFVAE IENS NKALQ TILQLEKKTSPFFPRMNVLQFVDQSKSDIGE  
1638 RIVRGLFVTTTHLKKQKVFVRVADFSKMNCNDITFKMRDRQNEDEFREISVTEYYQEAHKF  
1639 STRAGHRPCVVERKKRFNGEKEENNYPMDCLEIMDGQRIMDKKQSGDITAYLISEARVLP  
1640 RQMGEIKEELNHRVLNQEAEKYLEAFGVRSRDLLRSDAKILQAPKIA YGDKEKYLTTD  
1641 NGQKNAWKIDDALKFYRPGKISDAGGENEQNRWIFAVLNEFQSERDHAAAKRFLGKLQDR  
1642 AKLRGMLMLNPEVRCLDVRDPDPTVNKKLSELCQYAKANKVKFIMFIQYERKDMSRDTM  
1643 KQLETKFKLTTQQITMSTVNKGAGDKGDRMVLNLI LNKTNEKLGGINCIMKPSQIAQWF  
1644 SGNV MYMGLDISHPGLGGNALSSVTP TAVGMTFTKNRDEVQGRYWFQEAREHMLRSLKKQ  
1645 IVFAIEEFNRCSRRYPDKIVVYRGGVSEGEYDKVKTDEVEQFMEAFREINFPGKRKPALI  
1646 IVIVQRNSGYRLIPTQDNDFRGNDAIVQNVLPGTCAEVI GEGGRKEFILLVPHQAIQGTAK  
1647 PSKYVLIYDEAKCITLSELETLTNTLCYSHGIVTSPVSCPSILYQAGDLAKRAINNYRIH  
1648 SSRRDFGAMPPIEEVDKRNEYFDQMCMDMLQVTL DTRFWA

1649  
1650 >WAGO-10 (T22H9.3) #2 - L596\_g15911.t1

1651 MLPNRAPQGNE LQRNRKVELQVNGYMRINESKVYMH EIKMEVAFNTLKG LNRNVDLLARP  
1652 ANDVIRQKRRRLIWSIFHATRIKHPQQFLYNEYEYVYDCGGALFALHQIGDGNRIEFVMK  
1653 MADFPEEAKGQLHRAEHVILRLAFTRILDLRQSNLYDGGEAGEQRCRFVQQFLDILTSQY  
1654 VLGSDQHLVFNQNSRY SADPREDIEAHL SKVIKKGASKTINIVGDQKNQEALLFVEPRRSP  
1655 FMADKKVLDI VEEVRRELGGRSSNAQLKKKLEDLLKGIVVETIHQKDAVQFPVKGFSAEP  
1656 AGVLSFTMDAGESTTVADYFKRRYHLHVDRDMLCVVCERRQQKFYFPCV LVLVLPQQRVH  
1657 CSRQTPKLVEQLIKESQQLPSRMKEEVNHEREVYGFHEL NQQLKAFNVTVDTELCTAVGK  
1658 VLPPPVIQYEQRTVSADVDRSGQKITGRQWKVSGQRFVVRPAPTPEKVVLCVFENALESES  
1659 TRTFARAYVNAARSHGLILGEP IIERLQEVNQSTIYARGQAYKSN DVKFI LFI FGGDRKN  
1660 FERDIMKESETLFNYTTQAVNTKTAMKAI SDRGAFMVL DNLV MKTNLKLGGINHEL ANAQ  
1661 DFPQGYLEKVLFKAGRVFI GLDLQSPGMLGGADEFTLDPTVVGMTFTLGS PADMRGTYWY  
1662 QPAKKKYI SRLKDAIEDVLMVYQESVGS L PNDIVIYRAGVSEGDILMVVSEEI PAIKDYL  
1663 TTLDNPDGCPYRPHL TVMVAQKNSTMRMLPLV VHQTGRAQDENVEPGTSVSTNIVSARHT  
1664 EFVLA AQQALKGTARPTRYIVVHEEEGQFTVEQLENMTHQLCYLHGIVALPVS RPSPLYS  
1665 ATDLVKRGRANWKVRMERKEGSHTPLGPVNDTFFDPINEERLRFLPVTLPKFWA

1666  
1667 >WAGO-11 (Y49F6A.1) #1 - L596\_g17524.t1  
1668 MNKSSKIAAMP SFKKRPAENDDSPAPKRPAEKARRS QREEAPRRSHGGSKILMNGFRVE  
1669 IEKAMTIHKYYIQLNGIFKKRGGEEIARDLTEGVHRDDVSMQRKRRCWDVFRQIVKENE  
1670 SLFGGNTHKFVYDCGRLFCSMEEIFPKSETKTGTVDLATLPDRSQTFYRGALRIEWTIKK  
1671 VEDGTFKLGVPPEARS SDRSAQQFLEILTSQGLYARGDDHLIFRNQRYDVQENAPVDKKS  
1672 TYPFCVRQGVQKSVILCESAEKIATILQLEKKTSPFFPEMNLLDFVRQCSSDDKAMAVLK  
1673 GLQVQTTHLKRQOKTFRISGYSNTACKDIHFENRDGEKISVPEYFLKHHA FRTAAGQLPC  
1674 VEEKRKPQNNHYPMDC LKIVGGQRILS QKQPEIVEHLI STARILPLKMADEIGEQLGKH  
1675 IILNREAE TFLRTFKVNVDRN LLETEATLIKAPQIQYGNQNGV NPAKTLTTERGQKNAWK  
1676 MEDSLTFYRPGVVS DSGEAHRWMFVILNEPNQREHGDCRVFLEKFVARAGTRGIKIQFPH  
1677 VEKKRIENSDPWPELQEI GQYAKSNGVKFVMFVYERTGDIRKAMK LLETTFALTTQHVSL  
1678 KTISKAAGDKGAFMVL DNLMLKTNEKLGGLNTRVKAEP RVAEWF ERGTTMFMGFDVSHPG  
1679 LGARNENGVTPTAVGMSFTKNSDLEVVGRLWYQEPREHLI PNMKDHI VEALETFKKHSGK  
1680 FP ELVVVFRGGVSEGEYEVQTKEVQEFQDAFQQLKFSRKPILKIVVVQRNSGYRLMPAQ  
1681 RNDFGYQKNEALVQNVVPGTCADAEIVDQKRTEFV LVP HQAIQGTAKPSKYVLLHDEAPK  
1682 MSKEELSTIAHTLCFMHGIVTSPVSCPSILYQAGDLAKRASCNFKAFLNRKGGNVPIPPV  
1683 EEKEKRKEFFDALCEK LKITLDTRFWA

1684  
1685 >WAGO-11 (Y49F6A.1) #2 - L596\_g17422.t1  
1686 MPFPRGKGYHPYRGKSYHRGFGRNNFYRQTKREEYHSSDSSPTDNQPSTSRSHDRCDY  
1687 KPKDEDDMKLYLSDRKPSPEPPEFQIRINAFPFNIDHAPKEVHTYELIFVMSQKLKKEKE  
1688 PANHKLRTNAKL FSAEDIGLGFDAEEEGQVYHGTDMSCGPTDVVRRQRRKALLFQLFRH  
1689 LINQSKEYFPGSKYVYAYDGQRILYSPEVLKMD EGMFMAQLTDLPE SVTQLLGP SDQENT  
1690 EINAYIRKAEDVIDLHDFGTEARPIHGIEGFLETLTWQHAFEGFEEHIVYGTRYFALNAG  
1691 KKLKHCTGFKSIVGF EKRIELLPDYTC SNILLERSLRPVMRMTPKFDLFFDNSTAI SLDD  
1692 FAVLFFRVEVDDL SATLQKKENLQKLNQVFKNAVVRTIHRDDGRQDTFMI DHLDERNPFE  
1693 ITLKEEDEETVADYLYGVYGYKVDNRDLPCVARKFKNEFAYYPLRTLVL LPNQKVASKF  
1694 LPEDMRKSYQEACQNLPSDALNNIFTAMSQNLNLSRASEDYNND EKVIHVNNKYMENFKIT  
1695 LESNQLIQMPAQRICEPRIAYRESTH LAQDGAWDYEKAAVFIDAVIKVRRIGLVNTCEDV  
1696 GEDDLGEFISKLIGWLRNKTIDLKLTPEDI FWWPDAWNEFKAGKSKKEM LATAEKI IETS  
1697 EVKLMFVICSGSADDEIHDIWKLA EVTNELVKV NKKDFVTTQCITPATLSNLV LKSTYQD  
1698 EILTNIIMKMN LKLG GTNYVLSKSPSNEMSIPH IHS SRMFV GIDVLQPEKTQLNGEPTN  
1699 NPTVVGISFTDATSKFYLRGTYWYQQSPTVSLCLLQKHFDEALYWDCHKMDSVPREVFV  
1700 YWRDSRIQKNMEEVKMVLEDVICNRAKDVRRDASKLFLIMVDTKPKTR LFTWETQFSGNA  
1701 QTQNVQAGTFVRESYRKRQFTMINHKS GAGLAHPVRFTMINDDVNEKDYVEAELEKTTNA

1702 LCFLQNTSTRSTSIPAPLYSAMD LAKRGMKNYETMDAVMREEERDEDRKKREARTPEAWH  
1703 RYYKQLVKTHMSVMPIRD SKFWA  
1704  
1705 >WAGO-11 (Y49F6A.1) #3 - L596\_g18655.t1  
1706 MSPPRNGSNFN RGNHGRPPHGHNSQAKRVKWEHSSDSSPIYNQPSTSRSYDRQPKEEN  
1707 DVKPLFSSRERS PRLRLDLQIRINAFPFNLDHAPKEVYTYELIFVMSQK LKREKEPENYKI  
1708 RTNAKLLAEADVGLGWFEAE EPGQFYHGTDMSCGPM DVVRRQKRKALLFQLFRHLINQSK  
1709 EYFPGSKYVYAYD GQRILYSPEVLKMDEGMFMAQLADLPESVTQFLGLDDQKNTEINAYI  
1710 KKSDEVIDLHDFG TESKPIHGIEGFLETLTWQHAFEGFDKHIVYGTRDFALNAGK LKHC  
1711 TGFKSIVGFEKKI ELLPDYTSNMI LERRIHPVMRMTPKFDLFFDNST AISLEDFAVLFF  
1712 RVEVENLPATLQ KEENLQKLNQVFKNAVVRTNHRDDGRQDTF MIDHLDKRNPF EIIVTEE  
1713 DQETVADYLYDV YSYKVDRNDRLPCVARRFRNELAYYPLRTLVL LPNQKVASKFLSEDMR  
1714 KSFQEACQNLPS DALNNIFTAMSQNLNLSRASEDYNND EEVTHVNNEYMENFKITLESNQL  
1715 IQISANRVHEPQ IAYQKSVKPAQDGAWAYEKGAFFVHPKKGVRK IGLVNTCEDVKEDVLG  
1716 EFISKLIGWLRNK DIDLKLTKEDI FWWPDAFSDFGVMKSVKEMLAKAEKI LETSAVNHMI  
1717 VICNGSAEDKTH DVWKLAEVTNGLAKKDRTNFVTTQCITPTTLG SILVKSTYQDEILTSV  
1718 IMKMNLKLG GTNYVLTNSNRNYMSVPHITQDRMFVGI AVLQPEKTRLNGDATYNPTVVGL  
1719 SYSEGSPNFYLRG TYWYQQSPSVDLSILKKTFAEALYRFDKFHLIPKEIFVFWRS GKFQR  
1720 SMEEEKIALQEV IDKRVKDVNAKSPKLFII SVNTKPKTRFF TWETKFSGNAQTQNVQAGT  
1721 FVQESFLRREFT MINHKSQAGLAHPVRFTMLNDEIGE QDYAEAEIERTTNALCFLQNNST  
1722 RSTAVPAPLYSAMD LAKRGMKNYETMDAVIREEESE EERKKRETRTPEGWQKY YGNLMER  
1723 HMPVPIKSSKFWA  
1724  
1725 >WAGO-2 (F55A12.1) - L596\_g16917.t1  
1726 MHAHRLQQLTDG INRNLNDEGIARRTPMSPTPSVGRHDKEITL TSNLYELHLAHGKVRVY  
1727 HYTIKLSDYTGK TAEVHG DYGRVNLGSKLLLAADTFM KRNGFRDHDFFCDLAGMRLYTIK  
1728 PIPRSEGNPRFYV SEATKDG NFAVCRDDGRPFELNIRDVFKEVRI PNLQDATLDAFIN TA  
1729 INKACLAKSDLY FPIFETCYPKTGAPVARKDGRSLILG TKTSVERVEGRYGSSTTPVVAL  
1730 NVSAEFWYMKKNL LDFCKQNIELNEKSVPVDAASFQL LSDSMQGVTVRLICSKNPLLFTI  
1731 KSLANKNVSM LKYPLPNIKGTGLIKFLWETYSVRLTY PESFAAEVKPDFHVTDPRPIFY P  
1732 VELLEIMPMQRAL KGKSCDGS AVDREKKIQEKVHQMERHVQKAGLGLSMDDAPVEVEAG  
1733 VLDLPKIVFADEK VVEVNPSSASWRFGSGE CPERFARPAEVKELPWCVMLVSDVPPTKGM  
1734 SKKAKFFADLLK KQAAERGLQMK EPMYHPTKQ GKVEIERFFNTTAVEFFVFLMAKSLDYH  
1735 DFTKILERKYQV ITQTVKMENAFDVVEDPNSTKSRKIVEHIVMKMNLKLG VNSTVKPSR  
1736 HLF SHEEVRRL LIGFTLIEGPKITGRDAAAFNRFGGKI PAVVGFSANMG SLEHEFLGDF T  
1737 FQYLDHTNIVQD IKKIVATILERFRKTRRGRDPAE VVIYRKLDEFHFPRV IQNEIAPLKN  
1738 LLEEKCHGFVSLI YIAMTKTHNIRFFPKGPPPEG DERKPNLVPGTVIDSGAVGGGLKQFF  
1739 IASYSASTGTT RPPRFTILENSKEAKIRDLEKLTLELTF AHQTSTRSLGVPAPLVVAKNY  
1740 ARRGVNLAKNEAEKIS DVDTSVG VETMIDRLPYADAPVLRDKRVTA  
1741  
1742 >WAGO-5 (ZK1248.7) #1 - L596\_g12936.t1  
1743 MEGEGTEL RPSTVVRQARNAAASSAGAPPAAPGSRAATASVEKSFYSKLVNVPTPPPEEK  
1744 KPHGTAGRQLKLR TNVYGLSLPKDVQVFRYSVDASGTLQRNDLRIEFAKRVANDITYLNR  
1745 REKCRVIDQV VAKYSAIFGDRRELFWYDSQSILFSRNQLDISSEGQFVLDQSDIGQNPL  
1746 FEGFAHLKMVIRPA QTNFAVSIGDLEAYIQAEV FESDHALQQFLEILTAQYAFNTPLEAM  
1747 SFGSRTAYLLN PEKYGFKPADCADVGDGKFLGVGCDKSVRFIEGPGGAGSQR AALVVDLK  
1748 KTAFHKDQSLY EKAREILNNRDPKST DASRLRMQLKGIVVETKHGSR RQEFVNDVVADT  
1749 PATKKFKDLTGQ EVTLQQYFQQKYNITLQHPD SPIVLTDRTKKFAAFPMEVCSVVDGQRV  
1750 TLAQQTPVQIQMIRQC AVPPADRQRQILGLVQGLQLNSENKYHKAASV GITPTALQVQA  
1751 RLLQNPTIVYGRNSTMKPDEKATWRLARQKPVYLKPAKV DKWAMFVICGGNRSDCVDQDI  
1752 LNQFSNMVQECRARGMTVSDPTGFSFIGASREVVQETLEKAKTEGNQFCFFITNNDVTN

1753 IHQFMKFQERKLSIVTQDMKMSAFAFDVVRKGRQTLNENVNKTNMKNNGGVNYSLRFDDPA  
1754 FSMEKLLPKDRLVIGLATTHPKPIVVKKEQDEGPHDKKKQMHQQRTPPVPSVVGVAANA  
1755 LTESIEIVGDCLFQQPNREEKIALLOPVIRSLMLQFMKHRGMPPAEIVVYRQGTSEGOFR  
1756 DVMELEYKMOVKAAALQQGLNPKITFIVVQKMHNVRLMPMDSKAGDKAPEQNVKPGTVVDT  
1757 MVTHPKYNEFFLNHVALQGSARTPRYTPLYDENRLLPMDEIEALSHSLAFGHQIVNLTTT  
1758 LPAPLYIANRYAERGHNIFIASQEDYTKSKTSFQSPHSTTIEGNLDFGRMMNELSYCNSE  
1759 LKDKRVNA

1760

1761 >WAGO-5 (ZK1248.7) #2 - L596\_g12936.t1

1762 MEGEGTELRPSTVVRQARNAAASSAGAPPAAPGSRAATASVEKSFYSKLVNVPPTPPPEEK  
1763 KPHGTAGRQLKLRTNVYGLSLPKDVQVFRYSVDASGTLQRNDLRIEFAKRVANDITYLNR  
1764 REKCRVIDQVVAKYSAIFGDRRELFWYDSQSILFSRNQLDISSEGQFVLDQSDIGQNPL  
1765 FEGFAHLKMOVIRPAQTNFAVSIGDLEAYIQAEVFESDHALQQFLEILTAQYAFNTPLEAM  
1766 SFGSRTAYLLNPEKYGFKPADCADVGDGKFLGVGCDKSVRFIEGPGGAGSQRAALVVDLK  
1767 KTAFHKDQSLYEKAREILNNRDPKSTDASRLRMQLKGIIVVETKHGSRRQEFVADNVVADT  
1768 PATKKFKDLTGQEVTLQQYFQQKYNITLQHPDSPIVLTDRTKKFAAFPMEVCSVVDGQRV  
1769 TLAQQTTPVQIQKMIRQCAVPPADRQRQILGLVQGLQLNSENKYHKAASVGITPTALQVQA  
1770 RLLQNPTIVYGRNSTMKPDEKATWRLARQKPVYLLKPAKVDKWAMFVICGGRNSDCVDQDI  
1771 LNQFSNMVQECRARGMTVSDPTGFSFIGASREVVQETLEKAKTEGNQFCFFITNNDVTN  
1772 IHQFMKFQERKLSIVTQDMKMSAFAFDVVRKGRQTLNENVNKTNMKNNGGVNYSLRFDDPA  
1773 FSMEKLLPKDRLVIGLATTHPKPIVVKKEQDEGPHDKKKQMHQQRTPPVPSVVGVAANA  
1774 LTESIEIVGDCLFQQPNREEKIALLOPVIRSLMLQFMKHRGMPPAEIVVYRQGTSEGOFR  
1775 DVMELEYKMOVKAAALQQGLNPKITFIVVQKMHNVRLMPMDSKAGDKAPEQNVKPGTVVDT  
1776 MVTHPKYNEFFLNHVALQGSARTPRYTPLYDENRLLPMDEIEALSHSLAFGHQIVNLTTT  
1777 LPAPLYIANRYAERGHNIFIASQEDYTKSKTSFQSPHSTTIEGNLDFGRMMNELSYCNSE  
1778 LKDKRVNA

1779

1780 >WAGO-5 (ZK1248.7) #3 - L596\_g17875.t1

1781 MVCKGQATSEIELTTNAYGFLPFLSAKVQYDVEIVGILSGTGRTVNFTKCSKHDAFRAA  
1782 RIEECRDLFEMVKQKYPEVFNAPDSNYFYDNGRRLFTKESLLPPLVSKQEFPLNEFDTVY  
1783 LDRDYSRFDKILFSVEKAAEDPMDVKEVLKHVKDSGKSIRLNQFLNVLTSQHALSNPVKF  
1784 ATYRIGSAFFINADRYDHNHGVEDLTDDEKIRVGCESVKLIAGSSDDGSAIALVDIKRT  
1785 AFHKSGGTLKAREVLGKWPQPCDANRLKPHFIDLAVYTQHGSKDRRYVIDDVIAETPA  
1786 TLKFAWVRGSKELTLVEYFHQAYSIEIKFPRTPLAVAMAKEGRTIYLPLELCFVSPHQRV  
1787 TTAQQQATEEMIKRCSIPPLDRQKRIGRIVEAMKISDNPFLOIADTGCKLLSTIPLSVTG  
1788 RVIAPPKIRYGHSEIQKSAFLKPAKINSWAIIVLTAQDDPELARGDILSPSVLTKFARLF  
1789 RKECKARGMQLPDPFLKEFMKADVDQLGELMRCLAQGDSTECRPPFLRFIFVTNEKLTDL  
1790 HHPMKYFERQCGIITQDMKMQTVVDVVLHKKRQILENIVSKANIKNGGLNYSVVIIPDVPG  
1791 KRPILGSGRLIVGLFTSPTFKWQFEDSPSRPTALGYAANTTPNEGEFIGDCLIQKGRASA  
1792 IQTILRRVLAEFKKQRRCDPADVIIYRSCEEGREKKTLEEDLAAVRSILKSSNPMPTLTV  
1793 IAVQKRHGLRLMPTAIQRQGEPOSENLPKPGTVLDSCLTDPALTEFYLNHSHATLQGTARTP  
1794 KYTVVHNDVGLSLEEMETLTALSFSHQIVPLPTSLPSPLYIAGTYAERGVSLYQQDRER  
1795 GREGSLESCFTYGSPPGLKHLRITA

1796

1797 >WAGO-5 (ZK1248.7) #4 - L596\_g24399.t1

1798 MDVLTEAMSKMLPMNIAPKIVGAQDPYERVVPLTANMFPLHMRAEVPIFMYNVQVFMKVG  
1799 FREVNLVKRNTDDFTIIDHKNKCRSAFRFAVRAAPQVFGHPSGLFYDIIQAQLYSVRELKD  
1800 VLGNDLKKKEEIIIVPGEDARKAYDFQDIDLEYLRLVIEPVNGTNP SINL GELVLKQKNFS  
1801 DEVPCCELLQFLDVACSQHAFLLPTKFTTYPGGFAYFNPTSEEPARELPDAARLHNGVHKS  
1802 VKVIEGCTAGRCGELAVVLDPKKAAFHKPDI TVVQKI QEMGFLQMASENVAPHRIPELA  
1803 EALKNVFEVETRHGKRRSRFAIHSVVAESARTNRFTKDDGQVTVEEHFKKEYDIALKYPHL

1804 PLVVSAMPLRKKTPSNGRAPPRLFFPMEVLFICPNQRVLRNQOSAKQNNEVIKSCAVAPE  
1805 HRLKDVIASGQKMRINGPNVHGCLNSAQIQVESEPLKVEGRTLVPNNIDYKGCQVQVDSF  
1806 TGKWRNFGRNKPHYLEGGKIGRWGLYVLSKAPSSEEEQLALKFKDKMLVEFQSRGMQIDL  
1807 PMFLATVKATPLYLRTIFEKARKERLEFLFFIQDKDLALHNEMKFYERAYEVITQDLRTD  
1808 TARAVIEQGKNLSLENI IAKLNVKVGGTNYSVNGPSVPDLFKKGRLYIGLQASTNGPPAA  
1809 GAHLPTVVGSAANVTTAPSSFVGDIFYQKFGEMDLQGAMASTTEGYVKRYAAVHGRAPDE  
1810 VFIYRSGTANTNIGQMLRDEVPAIRCALKNSGASRARLTLVMVTKQHNVRMLPTNMTLGG  
1811 RAIDQNIKPGTVVDQKITHPRFAEFYLNHQALHGSAKTPKYVVVADDCSNPIQYLERVT  
1812 YALSYGHQIVGMPTSLPSPVYIAGKYAERGAALLQTKRNLGGALDVDALAEELAYANSKV  
1813 LGFKRINA  
1814
